# Supplementary material for: Single-arm, open-label, dose-escalation phase I study to evaluate the safety of a herbal medicine SH003 in patients with solid cancer: a study protocol
Source: PubMed Central journal article supplement — BMJ Open. 2018 Aug 5;8(8):e019502. doi: 10.1136/bmjopen-2017-019502 (PMC6078237; doi:10.1136/bmjopen-2017-019502), 2018-08-05
Supplement: bmjopen-2017-019502.draft_revisions.pdf [file bmjopen-2017-019502.draft_revisions.pdf]

# BMJ Open

BMJ Open is committed to open peer review. As part of this commitment we make the peer review history of every article we publish publicly available.

When an article is published we post the peer reviewers' comments and the authors' responses online. We also post the versions of the paper that were used during peer review. These are the versions that the peer review comments apply to.

The versions of the paper that follow are the versions that were submitted during the peer review process. They are not the versions of record or the final published versions. They should not be cited or distributed as the published version of this manuscript.

BMJ Open is an open access journal and the full, final, typeset and author-corrected version of record of the manuscript is available on our site with no access controls, subscription charges or pay-per-view fees (<http://bmjopen.bmj.com>).

If you have any questions on BMJ Open's open peer review process please email [info.bmjopen@bmj.com](mailto:info.bmjopen@bmj.com)

# BMJ Open

## Phase I dose-escalation study to evaluate the safety of SH003 in patients with solid cancer: a study protocol

|                               |                                                                                                                                                                                     |
|-------------------------------|-------------------------------------------------------------------------------------------------------------------------------------------------------------------------------------|
| Journal:                      | <i>BMJ Open</i>                                                                                                                                                                     |
| Manuscript ID                 | bmjopen-2017-019502                                                                                                                                                                 |
| Article Type:                 | Protocol                                                                                                                                                                            |
| Date Submitted by the Author: | 06-Sep-2017                                                                                                                                                                         |
| Complete List of Authors:     | Cheon, Chunhoo<br>Kang, Sohyeon; Kyung Hee University<br>Ko, Youme<br>Kim, Mia; Kyung Hee University<br>Jang, Bo-Hyoung<br>Shin, Yong-Cheol<br>Ko, Seong-Gyu; Kyung Hee University, |
| Keywords:                     | Herbal medicine < THERAPEUTICS, ONCOLOGY, COMPLEMENTARY MEDICINE                                                                                                                    |
|                               |                                                                                                                                                                                     |

SCHOLARONE™  
Manuscripts

Peer Review Only

# Phase I dose-escalation study to evaluate the safety of SH003 in patients with solid cancer: a study protocol

Chunhoo Cheon<sup>1</sup>, Sohyeon Kang<sup>1</sup>, Youme Ko<sup>1</sup>, Mia Kim<sup>2</sup>, Bo-Hyoung Jang<sup>1</sup>, Yong-Cheol Shin<sup>1</sup> and Seong-Gyu Ko<sup>1§</sup>

<sup>1</sup> Department of Korean Preventive Medicine, Graduate School, Kyung Hee University, Seoul, Republic of Korea

<sup>2</sup> Department of Cardiovascular and Neurologic disease (Stroke center), College of Korean Medicine, Kyung Hee University, Seoul, Republic of Korea

§Corresponding author

Email addresses:

CC: pm.thehoo@gmail.com

SK: kangsohyeon@gmail.com

YK: ymymko84@gmail.com

MK: hyuntemia@hanmail.net

BHJ: bhjang@khu.ac.kr

YCS: syc99@khu.ac.kr

SGK: epiko@khu.ac.kr

Correspondence to

Professor Seong-Gyu Ko; epiko@khu.ac.kr, 26, Kyungheedaero, Dongdaemun-gu, Seoul, 02447, Korea Tel. +82-2-961-9278

Word count: 2,556

1  
2  
3  
4 Abstract

5  
6 **Introduction**

7 Cancer is a major health problem worldwide and the leading cause of death in many countries.

8  
9 The number of patients with cancer and socioeconomic costs of cancer continues to increase.

10  
11 SH003 is a novel herbal medicine consist of Astragalus membranaceus, Angelica gigas, and  
12  
13 Trichosanthes Kirilowii Maximowicz. Preclinical studies showed that SH003 has therapeutic  
14  
15 effectiveness of anticancer. The aim of this study is to determine the maximum tolerated dose  
16  
17 of SH003 in patient with solid cancer.  
18  
19

20  
21 **Methods and analysis**

22 This study is an open-label, dose escalation trial evaluating the safety and tolerability of  
23  
24 SH003. The traditional 3+3 dose escalation design will be implemented. Patients with solid  
25  
26 cancer will be recruited. According to dose level, the patients will receive 1 to 3 tablets of  
27  
28 SH003 three times a day for 3 weeks. The toxicity will be evaluated using common  
29  
30 terminology criteria for adverse events (CTCAE). Dose-limiting toxicities are defined Grade  
31  
32 3 or higher adverse events based on CTCAE. Maximum tolerated dose will be determined by  
33  
34 the highest dose at which no more than 1 of 6 patients has dose-limiting toxicity.  
35  
36  
37

38  
39 **Ethics and dissemination**

40 This study has been approved by the institutional review board of the Ajou University  
41  
42 Hospital (reference AJIRB-MED-CT1-16-311). The results of this study will be disseminated  
43  
44 through a scientific journal and conference.  
45  
46

47 **Trial registrations**

48 ClinicalTrials.gov NCT03081819  
49  
50  
51  
52  
53  
54  
55  
56

## Strengths and limitations of this study

- This is the first human study to examine the safety and feasibility of SH003 for patients with solid cancer.
- The present study is the first Phase I study to determine maximum tolerated dose of herbal medicine in Korea.
- Limitations of this study is that pharmacokinetic and pharmacodynamics studies could not be conducted due to the nature of the drug.

## Introduction

Cancer which is the disease caused by an uncontrolled division of abnormal cells in a part of the body is a leading cause of death global, to the amount of 8.8 million deaths in 2015<sup>1</sup>. The economic cost of cancer is increasing. In 2010, the total economic cost of cancer was calculated at approximately 1.16 trillion US dollars<sup>2</sup>. In Korea, there were 1.46 million patients with cancer and 9.57% of people aged 65 and older were patients with cancer<sup>3</sup>. Korea National Health Insurance Service reported that socioeconomic cost of cancer was more than 12.1 billion US dollars in 2012, it is 43.2% of the socioeconomic costs of the five major causes of death<sup>4</sup>.

Although many investigation and development of several anticancer drugs, the global market for cancer treatment is continuing to grow due to unmet need. Under this circumstance, many herbal medicines have received attention as new anticancer drugs.

SH003 is a mixed herbal extract containing Huang-Qi (*Astragalus membranaceus*), Dang-Gui (*Angelica gigas*), and Gua-Lou-Gen (*Trichosanthes Kirilowii Maximowicz*), which are based on the principle of traditional Korean medicine. Huang-Qi has been reported to be effective in cancer treatment in many previous studies<sup>5</sup>. Dang-Gui enhances chemosensitivity in ovarian cancer cells by inhibition of P-glycoprotein expression<sup>6</sup>. Gua-Lou-Gen also showed anti-tumor activity on cancer cell<sup>7</sup>. According to the theoretical frameworks of

1  
2  
3  
4 Korean medicine, the effect of Huang-Qi is tonifying qi, Dang-Gui has the function of  
5  
6 tonifying blood, and Gua-Lou-Gen has effects of disperse swelling and expel pus<sup>8</sup>. Therefore,  
7  
8 the combination of those herbs is expected to be effective in the treatment of cancer patients.  
9  
10 It has been reported that SH003 suppresses breast cancer growth and metastasis by inducing  
11  
12 autophagy<sup>9</sup> and inhibiting STAT3-IL-6 signaling<sup>10</sup>, represses tumor angiogenesis by  
13  
14 inhibiting VEGF-induced VEGFR2 activation<sup>11</sup>, and induces apoptotic cell death of prostate  
15  
16 cancer cells by inhibiting ERK2-mediated signaling<sup>12</sup>.  
17  
18 SH003 has never been used in human before, therefore, in the present study, we designed a  
19  
20 phase I dose-escalation study to evaluate the maximum tolerated dose (MTD) of SH003 in  
21  
22 patients with solid cancer.  
23  
24  
25  
26  
27

## 28 **Methods**

### 29 **Study design**

30  
31  
32 A Phase I dose escalation study will be conducted at the Ajou University Hospital in Suwon,  
33  
34 Republic of Korea. Any participants who fulfilling the eligibility criteria will be enrolled. The  
35  
36 enrolled participants will be assigned to one of the three groups: 1,200 mg, 2,400 mg, and  
37  
38 4,800 mg of SH003 per day. Each participant will be examined for signs and symptoms of  
39  
40 any adverse events during the study period. Figure 1 shows the schematic flow of the present  
41  
42 study. Protocol amendments are not expected. However if it is essential, any change in the  
43  
44 study protocol will be informed to the entire investigators in a conference. All modifications  
45  
46 will be included in the final manuscript.  
47  
48  
49  
50

### 51 **Recruitment**

Subjects will be recruited as follows. Patients who visit the trial site and meet the criteria will be recommended to participate in the trial by the physician in charge of the study. Detailed information on the trial including study period, purpose of study, inclusion and exclusion criteria, and intervention will be provided by the investigators.

## Participants

### *Inclusion criteria*

Participants will be included when they meet the following criteria: 19 years and older; patients with histologically or cytologically confirmed solid cancer; metastatic or unresectable and for which standard curative measures do not exist or are no longer effective; ECOG Performance Status  $\leq 2$ ; life expectancy estimated to be at least 12 weeks; at least 4 weeks since prior chemotherapy or surgery, with recovery to haemoglobin  $\geq 8\text{g/dL}$ , platelet  $\geq 75,000/\mu\text{l}$ , absolute neutrophil count  $\geq 1,500/\mu\text{l}$ ; participants who can swallow tablet; ability to understand and willingness to sign a written informed consent document

### *Exclusion criteria*

The exclusion criteria are as follows: known hypersensitivity to any study drug component, including *Astragalus membranaceus*, *Angelica gigas*, or *Trichosanthes Kirilowii Maximowicz*; patient with acute or chronic infections requiring treatment (active HAV, HBV, HCV, HIV, TB); eGFR  $< 60\text{ml/min}$ , AST, ALT, total bilirubin  $\geq 2.5$  times institutional upper limit of normal (ULN); patient with uncontrolled cardiovascular diseases (unstable angina, heart failure, myocardial infarction, hypertension that remains uncontrolled: 140/90 mm Hg or higher); patient with active cytomegalovirus infection within 4 weeks; patient who experienced major surgery on cerebrovascular disease such as acute coronary syndrome,

1  
2  
3  
4 stroke, etc. within 1 year; pregnant or lactating females, women of childbearing potential;  
5  
6 patient who do not agrees to use effective means of contraception and not to donate sperm  
7  
8 during the trial and up to 1 month after final administration; patient who are taking  
9  
10 anticoagulants or anticonvulsants; any psychological, sociological, or geographical condition  
11  
12 that could potentially interfere with compliance with the study protocol; patient who  
13  
14 participated other clinical trials of medicine or medical devices within 1 month.  
15  
16  
17  
18

### 19 **Subject withdrawal criteria**

20  
21 The participants who meet the criteria as follows will be discontinued from the study: receive  
22  
23 other treatment for anti-cancer purposes; participant's withdrawal of consent; occurrence of a  
24  
25 serious adverse event related to investigational drug; occurrence of other significant protocol  
26  
27 violations during the trial including detection of eligibility violations; investigator's decision  
28  
29 to terminate the process for the sake of the participant's health. The participant who has been  
30  
31 withdrawn regardless of the investigational product will be replaced by a new participant.  
32  
33  
34  
35

### 36 **Sample size**

37  
38 The present study is a dose-escalation study that examine the MTD of SH003 for patient with  
39  
40 solid cancer. Thus, dose escalation rules for the traditional 3 + 3 design will be adopted<sup>13</sup>.  
41  
42 Three patients are initially enrolled into a starting dose cohort. If there is no dose-limiting  
43  
44 toxicity (DLT) observed in any of these participants, the study proceeds to enroll additional  
45  
46 participants into the next higher dose cohort. If one participant develops a DLT at a specific  
47  
48 dose, an additional three participants are enrolled into that same dose cohort. Development of  
49  
50 DLTs in more than 1 of 6 participants in a specific dose suggests that the MTD has been  
51  
52 exceeded, and further dose escalation will be stopped. The present study plans to escalate the  
53  
54  
55  
56



1  
2  
3  
4 dose of SH003 up to three times. Thus, at least 3 up to 18 participants will be recruited for the  
5  
6 study. Three to six participants will be allocated to the each dose of SH003.  
7  
8  
9

### 10 **Allocation**

11  
12 The study participants who satisfy the eligibility criteria will be assigned to each cohort in  
13  
14 sequence which they are recruited. After one cohort has been recruited, the participant  
15  
16 enrolment will be suspended until the end of the study of the cohort to check whether DLT  
17  
18 occurred in the cohort. The recruitment and dose of the following cohort will depend on the  
19  
20 outcome of the previous cohort.  
21  
22  
23  
24  
25  
26  
27

### 28 **Treatment protocol**

29  
30 The participants will receive SH003 for three weeks. They will orally take 1 to 3 tablets with  
31  
32 water three times a day after meals for 3 weeks according to their dose level. The daily doses  
33  
34 were determined based on repeated dose toxicity test and in vivo efficacy study<sup>10</sup>. The  
35  
36 participants will be required to return remains of investigational products for calculating the  
37  
38 compliance. During the study, the participants will be prohibited to receive other treatment  
39  
40 for cancer including chemotherapy and radiotherapy.  
41  
42  
43  
44

### 45 **Interventions**

46  
47 Hanpoong Pharm and Foods Co., Ltd., the pharmaceutical company, produces the SH003 in  
48  
49 accordance with Korea Good Manufacturing Practice (KGMP) standards. SH003 used in the  
50  
51 present study is a pale yellow to brown and rectangular tablet. One tablet (total of 800 mg)  
52  
53 including 400mg of solid extract from *Astragalus membranaceus* · *Angelica gigas* ·  
54  
55 *Trichosanthes Kirilowii Maximowicz* (1:1:1) 30% ethanol extract.  
56

### **Primary outcome measurement**

The primary outcome in the present study is the adverse events (AEs) with grade 3 or 4 throughout the study period measured by national cancer institute (NCI) common terminology criteria for adverse events (CTCAE) v4.03<sup>14</sup>. CTCAE is a sort of list of AE commonly occurred in oncology. Each AE term has a grading scale which indicates the severity of AE. The AE will be measured by a trained investigator at every visit according to standard operating procedures (SOPs).

### **Secondary outcome measurement**

Secondary outcome measurements include the AEs regardless of grade throughout the study period measured by NCI CTCAE v4.03 and change in tumour size on computed tomography (CT) imaging. The study schedule is detailed in Table 1.

**Table 1 - Study schedule of SH003 Phase I study (4 weeks)**

| TIMEPOINT                    | STUDY PERIOD |                  |       |        |           |
|------------------------------|--------------|------------------|-------|--------|-----------|
|                              | Enrolment    | Treatment Period |       |        | Close-out |
|                              | Day -7       | Day 0            | Day 8 | Day 22 | Day 29    |
| Eligibility screen           | X            |                  |       |        |           |
| Informed consent             | X            |                  |       |        |           |
| Allocation                   |              | X                |       |        |           |
| SH003                        |              | ←—————→          |       |        |           |
| Demographic characteristic   | X            |                  |       |        |           |
| Physical examination         | X            | X                | X     | X      | X         |
| Vital signs                  | X            | X                | X     | X      | X         |
| Laboratory test              | X            |                  | X     | X      | X         |
| Electrocardiography          | X            |                  |       | X      |           |
| Pregnancy test               | X            |                  |       |        |           |
| Medical/drug use history     | X            |                  |       |        |           |
| Smoking and drinking history | X            |                  |       |        |           |
| Computed tomography          | X            |                  |       |        | X         |
| Compliance calculation       |              |                  | X     | X      |           |
| Concomitant medication       | X            | X                | X     | X      | X         |
| Adverse event                |              |                  | X     | X      | X         |

## **Safety outcomes**

All variables related to the safety of participant including vital signs, physical examination, hematologic test, biochemical test, urine test and adverse events will be documented on the case report form (CRF) at every visit. If the adverse event is severe and associated with the investigational product, the participant will be withdrawn from the study, and then the appropriate therapy will be given to him or her. Any loss caused by the present study will be reimbursed by insurance.

## **Outcomes analysis**

### ***Determination of maximum tolerated dose***

MTD will be defined as that dose level at which more than 1 out of 6 patients exhibit dose limiting toxicity during the 4 weeks of trial period. In the present study, the highest dose among three dose groups of 1200 mg, 2400 mg and 4800 mg per day with less than one patient with dose limiting toxicity will be determined as the MTD of SH003.

All analyses of data from the present study will be descriptive as the study has no inferential analysis and general hypothesis test. The continuous variables will be displayed as the mean and range, and the categorical variables will be displayed as the numbers. After completion of each cohort's study period, an analysis will be conducted to determine the subsequent dose level.

## **Data and safety monitoring**

To maintain the quality of the present study, monitoring will be conducted by the contract research organization (CRO). The institution participating in the present study will be monitored while this trial is in progress using SOPs. For data quality improvement, double data entry and range checks for data values will be done. Suspected unexpected serious

1  
2  
3  
4 adverse reactions will be reported to institutional review board (IRB) and regulatory  
5  
6 authorities in Republic of Korea within 24 hours.  
7  
8  
9

### 10 **Ethics and dissemination**

11  
12 The present study has been approved by the IRB of the Ajou University Hospital (reference  
13  
14 AJIRB-MED-CT1-16-311). The current protocol version is 1.1. A written informed consent  
15  
16 will be obtained from each participant prior to commencement of the trial procedure by the  
17  
18 investigator. Informed consent for the research use of human biological material will be also  
19  
20 obtained for collection, storage and use of blood samples from participants. The trial will be  
21  
22 performed in compliance with the Helsinki Declaration and according to Good Clinical  
23  
24 Practice as described by the Korea Food and Drug Administration.  
25  
26

27 The confidentiality of personal information of patients will be protected. Each participant will  
28  
29 be given a study identification number at the study enrolment. During the trial period, data  
30  
31 will be dealt by the study identification number. During and after the study, all the records  
32  
33 will be kept secure in a locked cabinets or password protected computer files. Only  
34  
35 participating investigators will have the authority to access to the data. The results of this  
36  
37 study will be disseminated through academic journal or scientific conference.  
38  
39  
40  
41  
42  
43  
44  
45

### 46 **Discussion**

47 The present study investigates the tolerability and safety of SH003 in patient with solid  
48  
49 cancer. Globally, 8.2 million deaths from cancer in 2012, and cancer is also the leading cause  
50  
51 of mortality in Korea.<sup>15 16</sup> Thus, development of anti-cancer drugs is also active in Korea.  
52  
53  
54 Among total 628 cases of investigational new drug (IND) approval in 2016, the number of  
55  
56

1  
2  
3  
4 anti-cancer drugs was the highest as 202 cases.<sup>17</sup> Nevertheless there is little IND approval for  
5  
6 new herbal medicine as anti-cancer drug. In this situation, SH003 received IND approval  
7  
8 from MFDS to begin phase I trial as anti-cancer drug.  
9

10 In addition to the effect of tumour size reduction, SH003 has shown several potential as an  
11  
12 anti-cancer agent in preclinical studies. Combination of SH003 and paclitaxel enhanced  
13  
14 apoptotic cell death of paclitaxel-resistant breast cancer cells by inhibition of multidrug  
15  
16 resistance protein 1 (MDR1) expression.<sup>18</sup> Decursin in Dang-Gui, one of the constituent herbs  
17  
18 of SH003, inhibited doxorubicin-resistant ovarian cancer cell proliferation and induced  
19  
20 apoptosis.<sup>6</sup> Combination of SH003 and doxorubicin showed synergistic effect in triple  
21  
22 negative breast cancer (TNBC) treatment.<sup>19</sup> Therefore, those studies suggest that SH003  
23  
24 could be used for an anti-MDR tumour agent and combination therapy with conventional  
25  
26 chemotherapy drugs. SH003 showed efficacy in various cancers including breast cancer,  
27  
28 ovarian cancer and prostate cancer. Thus, further clinical studies are necessary to evaluate the  
29  
30 effectiveness for various cancers.  
31  
32

33  
34 The present study has its own significance. First, it is the first Phase I dose-escalation study to  
35  
36 determine MTD for new herbal medicine in Korea. There were several studies that  
37  
38 investigated anti-cancer effect of herbal medicine. Most of them were preclinical studies or  
39  
40 clinical trials to evaluate effectiveness of established herbal medicine in cancer patients.<sup>20-23</sup>  
41  
42 Second, the present study will investigate the effect of SH003 on the changes in tumour size  
43  
44 for planning further studies to evaluate efficacy.  
45  
46

47 Limitations of the present study are that the number of dose level is relatively small and the  
48  
49 study does not include pharmacokinetics and pharmacodynamics research. Due to the nature  
50  
51 of the formulation, the dose exceeding 4 tablets is inconvenient and may reduce the patient  
52  
53 compliance, so the upper limit of dose level was determined as 4,800 mg per day, the third  
54  
55 dose level. The effective dose estimated from preclinical studies was also considered.<sup>10</sup> Since  
56  
57

1  
2  
3  
4 most herbal medicine, including SH003 is composed of complex compounds, thus PK and  
5  
6 PD study is not easy<sup>24</sup>. Based on *in vivo* PK studies currently being performed, further human  
7  
8 studies should be conducted.  
9

10 Although the present study also has a few limitations, this study would serve as a first-in-  
11  
12 human trials to plan therapeutic exploratory trials of SH003 on patient with cancer. To the  
13  
14 best of our knowledge, this is the first Phase I study on herbal medicine in Korea. We expect  
15  
16 that the present study could contribute to promoting the development of new herbal medicine.  
17  
18  
19  
20  
21  
22  
23

## 24 **Authors' affiliations**

25  
26 <sup>1</sup> Department of Korean Preventive Medicine, Graduate School, Kyung Hee University, 26,  
27  
28 Kyungheedaero-ro, Dongdaemun-gu, Seoul, Republic of Korea

29  
30 <sup>2</sup> Department of Cardiovascular and Neurologic disease (Stroke center), College of Korean  
31  
32 Medicine, Kyung Hee University, Seoul, Republic of Korea  
33  
34  
35  
36  
37

## 38 **Acknowledgements**

39 We wish to acknowledge Hanpoong Pharm. & Foods Co. Ltd. for providing investigational  
40  
41 product support.  
42  
43  
44  
45  
46

## 47 **Contributors**

48 CC, SK and YK have written the first manuscript for this trial and they will contribute to  
49  
50 monitoring this trial. MK, BHJ and YCS have edited the first manuscript. SGK has conducted  
51  
52 all the procedures for this protocol. All authors have read and approved the final manuscript.  
53  
54  
55  
56  
57

## Funding

This research was supported by a grant of the Korea Health Technology R&D Project through the Korea Health Industry Development Institute (KHIDI), funded by the Ministry of Health & Welfare, Republic of Korea (grant number : HI11C2110). The management, analysis and reporting of study will be conducted independently by the study investigators.

## Competing interests

None declared.

## Patients consent

Obtained

## Ethics approval

The Institutional Review Board of the Ajou University Hospital approved the study (reference AJIRB-MED-CT1-16-311).

## Provenance and peer review

Not commissioned; externally peer reviewed.

## References

1. World Health Organization. Cancer, fact sheet. Updated February 2017 ed: World Health Organization, 2017.
2. World Health Organization. World cancer report 2014: Lyon: International Agency for Research on Cancer, 2014.
3. National Cancer Center. National Cancer Information Center 2017 [Available from: <http://www.cancer.go.kr> July 2017.



4. Hyun KR, Lee SM. Analysis of Socioeconomic Costs of Five Major Diseases. *Health insurance & policy* 2014;13(2):91-107.
5. Auyeung KK, Han QB, Ko JK. Astragalus membranaceus: A Review of its Protection Against Inflammation and Gastrointestinal Cancers. *Am J Chin Med* 2016;44(1):1-22. doi: 10.1142/s0192415x16500014 [published Online First: 2016/02/27]
6. Choi HS, Cho SG, Kim MK, et al. Decursin in Angelica gigas Nakai (AGN) Enhances Doxorubicin Chemosensitivity in NCI/ADR-RES Ovarian Cancer Cells via Inhibition of P-glycoprotein Expression. *Phytother Res* 2016;30(12):2020-26. doi: 10.1002/ptr.5708 [published Online First: 2016/09/09]
7. Li J, Li H, Zhang Z, et al. The anti-cancerous activity of recombinant trichosanthin on prostate cancer cell PC3. *Biol Res* 2016;49:21.
8. National College of Korean Medicine Publication Committee on Joint Textbook. *Herbology*. Seoul, Korea: Younglimsa 2016.
9. Choi YK, Cho SG, Choi YJ, et al. SH003 suppresses breast cancer growth by accumulating p62 in autolysosomes. *Oncotarget* 2016 doi: 10.18632/oncotarget.11393 [published Online First: 2016/08/25]
10. Choi YK, Cho SG, Woo SM, et al. Herbal extract SH003 suppresses tumor growth and metastasis of MDA-MB-231 breast cancer cells by inhibiting STAT3-IL-6 signaling. *Mediators Inflamm* 2014;2014:492173.
11. Choi HS, Kim MK, Lee K, et al. SH003 represses tumor angiogenesis by blocking VEGF binding to VEGFR2. *Oncotarget* 2016;7(22):32969-79.
12. Choi YJ, Choi YK, Lee KM, et al. SH003 induces apoptosis of DU145 prostate cancer cells by inhibiting ERK-involved pathway. *BMC Complement Altern Med* 2016;16(1):507.
13. Storer BE. An evaluation of phase I clinical trial designs in the continuous dose-response setting. *Stat Med* 2001;20(16):2399-408. [published Online First: 2001/08/21]
14. U.S.Department of Health and Human Services. Common Terminology Criteria for Adverse Events (CTCAE) v4.03: National Institutes of Health National Cancer Institute, 2010.
15. International Agency for Research on Cancer. GLOBOCAN 2012: Estimated Cancer Incidence, Mortality and Prevalence Worldwide in 2012: World Health Organization; 2012 [Available from: [http://globocan.iarc.fr/Pages/fact\\_sheets\\_cancer.aspx](http://globocan.iarc.fr/Pages/fact_sheets_cancer.aspx) accessed 2015.07.04 2015.
16. National Cancer Center. Cancer Facts & Figures 2014. In: Welfare MoH, ed.: Ministry of Health & Welfare, 2014.
17. Ministry of Food and Drug Safety. MFDS, Results of the Investigational New Drug approval status 2016. In: MFDS, ed. Osong, Korea: Ministry of Food and Drug Safety, 2017.
18. Choi HS, Cho SG, Kim MK, et al. SH003 enhances paclitaxel chemosensitivity in MCF-7/PAX breast cancer cells through inhibition of MDR1 activity. *Mol Cell Biochem* 2017;426(1-2):1-8. doi: 10.1007/s11010-016-2875-y [published Online First: 2016/11/18]
19. Woo SM, Kim AJ, Choi YK, et al. Synergistic Effect of SH003 and Doxorubicin in Triple-negative Breast Cancer. *Phytother Res* 2016;30(11):1817-23. doi: 10.1002/ptr.5687 [published Online First: 2016/11/05]
20. Kim HY, Kim J, Ha Thi HT, et al. Evaluation of anti-tumorigenic activity of BP3B against colon cancer with patient-derived tumor xenograft model. *BMC Complement Altern Med* 2016;16(1):473.

- 1  
2  
3  
4 21. Choi BY, Joo JC, Lee YK, et al. Anti-cancer effect of *Scutellaria baicalensis* in  
5 combination with cisplatin in human ovarian cancer cell. *BMC Complement Altern*  
6 *Med* 2017;17(1):277.  
7  
8 22. Lee SI, Bae JA, Ko YS, et al. Gejjigajakyak decoction inhibits the motility and  
9 tumorigenesis of colorectal cancer cells. *BMC Complement Altern Med*  
10 2016;16(1):288.  
11 23. Jeong JS, Ryu BH, Kim JS, et al. Bojungikki-tang for cancer-related fatigue: a pilot  
12 randomized clinical trial. *Integr Cancer Ther* 2010;9(4):331-8. doi:  
13 10.1177/1534735410383170 [published Online First: 2010/11/10]  
14 24. Liu WJH. Traditional Herbal Medicine Research Methods: Identification, Analysis,  
15 Bioassay, and Pharmaceutical and Clinical Studies: Wiley 2011.  
16  
17  
18  
19  
20  
21  
22  
23  
24  
25  
26  
27  
28  
29  
30  
31  
32  
33  
34  
35  
36  
37  
38  
39  
40  
41  
42  
43  
44  
45  
46  
47  
48  
49  
50  
51  
52  
53  
54  
55  
56  
57  
58  
59  
60

1  
2  
3  
4  
5  
6  
7  
8  
9  
10  
11  
12  
13  
14  
15  
16  
17  
18  
19  
20  
21  
22  
23  
24  
25  
26  
27  
28  
29  
30  
31  
32  
33  
34  
35  
36  
37  
38  
39  
40  
41  
42  
43  
44  
45  
46  
47  
48  
49  
50  
51  
52  
53  
54  
55  
56  
57  
58  
59  
60

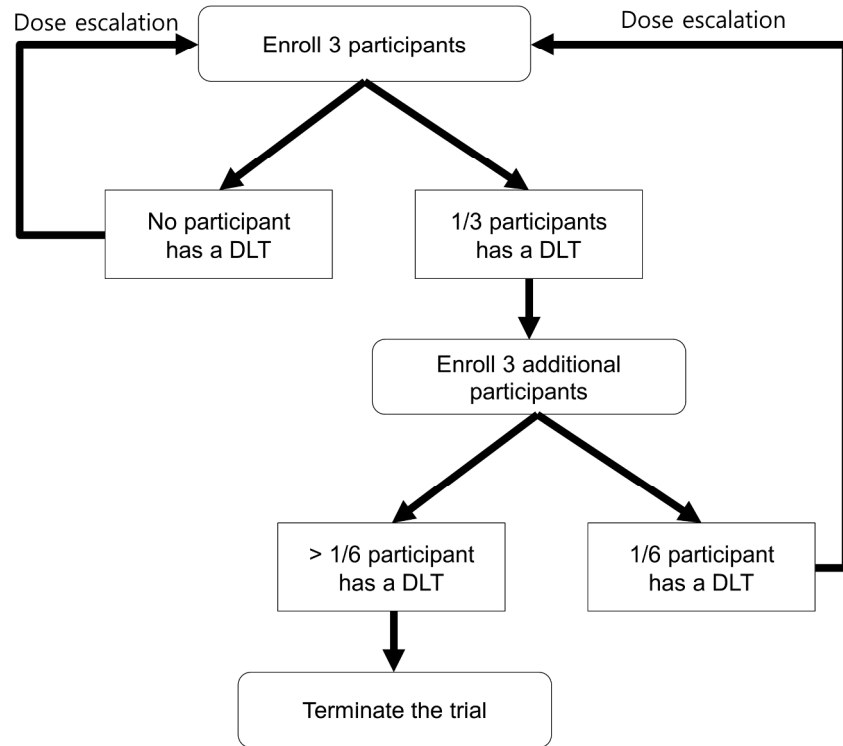

Study flow chart. SH003

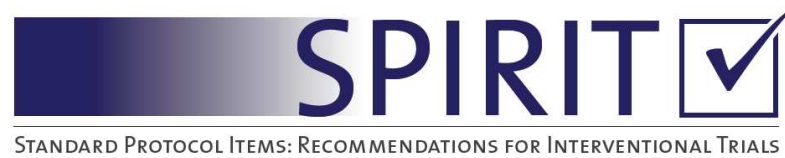

SPIRIT 2013 Checklist: Recommended items to address in a clinical trial protocol and related documents\*

| Section/item                      | Item No | Description                                                                                                                                                                                                                                                                              | Addressed on page number |
|-----------------------------------|---------|------------------------------------------------------------------------------------------------------------------------------------------------------------------------------------------------------------------------------------------------------------------------------------------|--------------------------|
| <b>Administrative information</b> |         |                                                                                                                                                                                                                                                                                          |                          |
| Title                             | 1       | Descriptive title identifying the study design, population, interventions, and, if applicable, trial acronym                                                                                                                                                                             | _____1_____              |
| Trial registration                | 2a      | Trial identifier and registry name. If not yet registered, name of intended registry                                                                                                                                                                                                     | _____2_____              |
|                                   | 2b      | All items from the World Health Organization Trial Registration Data Set                                                                                                                                                                                                                 | ___Appendix___           |
| Protocol version                  | 3       | Date and version identifier                                                                                                                                                                                                                                                              | _____11_____             |
| Funding                           | 4       | Sources and types of financial, material, and other support                                                                                                                                                                                                                              | _____13_____             |
| Roles and responsibilities        | 5a      | Names, affiliations, and roles of protocol contributors                                                                                                                                                                                                                                  | _____13_____             |
|                                   | 5b      | Name and contact information for the trial sponsor                                                                                                                                                                                                                                       | _____13_____             |
|                                   | 5c      | Role of study sponsor and funders, if any, in study design; collection, management, analysis, and interpretation of data; writing of the report; and the decision to submit the report for publication, including whether they will have ultimate authority over any of these activities | _____13_____             |
|                                   | 5d      | Composition, roles, and responsibilities of the coordinating centre, steering committee, endpoint adjudication committee, data management team, and other individuals or groups overseeing the trial, if applicable (see Item 21a for data monitoring committee)                         | _____NA_____             |

1  
2  
3  
4  
5  
6  
7  
8  
9  
10  
11  
12  
13  
14  
15  
16  
17  
18  
19  
20  
21  
22  
23  
24  
25  
26  
27  
28  
29  
30  
31  
32  
33  
34  
35  
36  
37  
38  
39  
40  
41  
42  
43  
44  
45  
46  
47

## Introduction

|                          |    |                                                                                                                                                                                                           |     |
|--------------------------|----|-----------------------------------------------------------------------------------------------------------------------------------------------------------------------------------------------------------|-----|
| Background and rationale | 6a | Description of research question and justification for undertaking the trial, including summary of relevant studies (published and unpublished) examining benefits and harms for each intervention        | 3-4 |
|                          | 6b | Explanation for choice of comparators                                                                                                                                                                     | NA  |
| Objectives               | 7  | Specific objectives or hypotheses                                                                                                                                                                         | 4   |
| Trial design             | 8  | Description of trial design including type of trial (eg, parallel group, crossover, factorial, single group), allocation ratio, and framework (eg, superiority, equivalence, noninferiority, exploratory) | 4   |

## Methods: Participants, interventions, and outcomes

|                      |     |                                                                                                                                                                                                                                                                                                                                                                                |     |
|----------------------|-----|--------------------------------------------------------------------------------------------------------------------------------------------------------------------------------------------------------------------------------------------------------------------------------------------------------------------------------------------------------------------------------|-----|
| Study setting        | 9   | Description of study settings (eg, community clinic, academic hospital) and list of countries where data will be collected. Reference to where list of study sites can be obtained                                                                                                                                                                                             | 4   |
| Eligibility criteria | 10  | Inclusion and exclusion criteria for participants. If applicable, eligibility criteria for study centres and individuals who will perform the interventions (eg, surgeons, psychotherapists)                                                                                                                                                                                   | 5-6 |
| Interventions        | 11a | Interventions for each group with sufficient detail to allow replication, including how and when they will be administered                                                                                                                                                                                                                                                     | 7   |
|                      | 11b | Criteria for discontinuing or modifying allocated interventions for a given trial participant (eg, drug dose change in response to harms, participant request, or improving/worsening disease)                                                                                                                                                                                 | 6   |
|                      | 11c | Strategies to improve adherence to intervention protocols, and any procedures for monitoring adherence (eg, drug tablet return, laboratory tests)                                                                                                                                                                                                                              | 7   |
|                      | 11d | Relevant concomitant care and interventions that are permitted or prohibited during the trial                                                                                                                                                                                                                                                                                  | 7   |
| Outcomes             | 12  | Primary, secondary, and other outcomes, including the specific measurement variable (eg, systolic blood pressure), analysis metric (eg, change from baseline, final value, time to event), method of aggregation (eg, median, proportion), and time point for each outcome. Explanation of the clinical relevance of chosen efficacy and harm outcomes is strongly recommended | 8   |
| Participant timeline | 13  | Time schedule of enrolment, interventions (including any run-ins and washouts), assessments, and visits for participants. A schematic diagram is highly recommended (see Figure)                                                                                                                                                                                               | 9   |

|   |             |    |                                                                                                                                                                                       |             |
|---|-------------|----|---------------------------------------------------------------------------------------------------------------------------------------------------------------------------------------|-------------|
| 1 |             |    |                                                                                                                                                                                       |             |
| 2 |             |    |                                                                                                                                                                                       |             |
| 3 | Sample size | 14 | Estimated number of participants needed to achieve study objectives and how it was determined, including clinical and statistical assumptions supporting any sample size calculations | _____6_____ |
| 4 |             |    |                                                                                                                                                                                       |             |
| 5 | Recruitment | 15 | Strategies for achieving adequate participant enrolment to reach target sample size                                                                                                   | _____5_____ |
| 6 |             |    |                                                                                                                                                                                       |             |
| 7 |             |    |                                                                                                                                                                                       |             |

### 8 **Methods: Assignment of interventions (for controlled trials)**

#### 9 Allocation:

|    |                                  |     |                                                                                                                                                                                                                                                                                                                                                          |              |
|----|----------------------------------|-----|----------------------------------------------------------------------------------------------------------------------------------------------------------------------------------------------------------------------------------------------------------------------------------------------------------------------------------------------------------|--------------|
| 10 |                                  |     |                                                                                                                                                                                                                                                                                                                                                          |              |
| 11 |                                  |     |                                                                                                                                                                                                                                                                                                                                                          |              |
| 12 | Sequence generation              | 16a | Method of generating the allocation sequence (eg, computer-generated random numbers), and list of any factors for stratification. To reduce predictability of a random sequence, details of any planned restriction (eg, blocking) should be provided in a separate document that is unavailable to those who enrol participants or assign interventions | _____NA_____ |
| 13 |                                  |     |                                                                                                                                                                                                                                                                                                                                                          |              |
| 14 |                                  |     |                                                                                                                                                                                                                                                                                                                                                          |              |
| 15 |                                  |     |                                                                                                                                                                                                                                                                                                                                                          |              |
| 16 |                                  |     |                                                                                                                                                                                                                                                                                                                                                          |              |
| 17 | Allocation concealment mechanism | 16b | Mechanism of implementing the allocation sequence (eg, central telephone; sequentially numbered, opaque, sealed envelopes), describing any steps to conceal the sequence until interventions are assigned                                                                                                                                                | _____NA_____ |
| 18 |                                  |     |                                                                                                                                                                                                                                                                                                                                                          |              |
| 19 |                                  |     |                                                                                                                                                                                                                                                                                                                                                          |              |
| 20 |                                  |     |                                                                                                                                                                                                                                                                                                                                                          |              |
| 21 | Implementation                   | 16c | Who will generate the allocation sequence, who will enrol participants, and who will assign participants to interventions                                                                                                                                                                                                                                | _____NA_____ |
| 22 |                                  |     |                                                                                                                                                                                                                                                                                                                                                          |              |
| 23 |                                  |     |                                                                                                                                                                                                                                                                                                                                                          |              |
| 24 | Blinding (masking)               | 17a | Who will be blinded after assignment to interventions (eg, trial participants, care providers, outcome assessors, data analysts), and how                                                                                                                                                                                                                | _____NA_____ |
| 25 |                                  |     |                                                                                                                                                                                                                                                                                                                                                          |              |
| 26 |                                  |     |                                                                                                                                                                                                                                                                                                                                                          |              |
| 27 |                                  | 17b | If blinded, circumstances under which unblinding is permissible, and procedure for revealing a participant's allocated intervention during the trial                                                                                                                                                                                                     | _____NA_____ |
| 28 |                                  |     |                                                                                                                                                                                                                                                                                                                                                          |              |
| 29 |                                  |     |                                                                                                                                                                                                                                                                                                                                                          |              |
| 30 |                                  |     |                                                                                                                                                                                                                                                                                                                                                          |              |

### 31 **Methods: Data collection, management, and analysis**

|    |                         |     |                                                                                                                                                                                                                                                                                                                                                                                                              |             |
|----|-------------------------|-----|--------------------------------------------------------------------------------------------------------------------------------------------------------------------------------------------------------------------------------------------------------------------------------------------------------------------------------------------------------------------------------------------------------------|-------------|
| 32 |                         |     |                                                                                                                                                                                                                                                                                                                                                                                                              |             |
| 33 | Data collection methods | 18a | Plans for assessment and collection of outcome, baseline, and other trial data, including any related processes to promote data quality (eg, duplicate measurements, training of assessors) and a description of study instruments (eg, questionnaires, laboratory tests) along with their reliability and validity, if known. Reference to where data collection forms can be found, if not in the protocol | _____8_____ |
| 34 |                         |     |                                                                                                                                                                                                                                                                                                                                                                                                              |             |
| 35 |                         |     |                                                                                                                                                                                                                                                                                                                                                                                                              |             |
| 36 |                         |     |                                                                                                                                                                                                                                                                                                                                                                                                              |             |
| 37 |                         |     |                                                                                                                                                                                                                                                                                                                                                                                                              |             |
| 38 |                         | 18b | Plans to promote participant retention and complete follow-up, including list of any outcome data to be collected for participants who discontinue or deviate from intervention protocols                                                                                                                                                                                                                    | _____6_____ |
| 39 |                         |     |                                                                                                                                                                                                                                                                                                                                                                                                              |             |
| 40 |                         |     |                                                                                                                                                                                                                                                                                                                                                                                                              |             |
| 41 |                         |     |                                                                                                                                                                                                                                                                                                                                                                                                              |             |
| 42 |                         |     |                                                                                                                                                                                                                                                                                                                                                                                                              |             |
| 43 |                         |     |                                                                                                                                                                                                                                                                                                                                                                                                              |             |
| 44 |                         |     |                                                                                                                                                                                                                                                                                                                                                                                                              |             |
| 45 |                         |     |                                                                                                                                                                                                                                                                                                                                                                                                              |             |
| 46 |                         |     |                                                                                                                                                                                                                                                                                                                                                                                                              |             |
| 47 |                         |     |                                                                                                                                                                                                                                                                                                                                                                                                              |             |

1  
2  
3  
4  
5  
6  
7  
8  
9  
10  
11  
12  
13  
14  
15  
16  
17  
18  
19  
20  
21  
22  
23  
24  
25  
26  
27  
28  
29  
30  
31  
32  
33  
34  
35  
36  
37  
38  
39  
40  
41  
42  
43  
44  
45  
46  
47

|                 |    |                                                                                                                                                                                                                                                                   |              |
|-----------------|----|-------------------------------------------------------------------------------------------------------------------------------------------------------------------------------------------------------------------------------------------------------------------|--------------|
| Data management | 19 | Plans for data entry, coding, security, and storage, including any related processes to promote data quality (eg, double data entry; range checks for data values). Reference to where details of data management procedures can be found, if not in the protocol | _____10_____ |
|-----------------|----|-------------------------------------------------------------------------------------------------------------------------------------------------------------------------------------------------------------------------------------------------------------------|--------------|

|                     |     |                                                                                                                                                                          |              |
|---------------------|-----|--------------------------------------------------------------------------------------------------------------------------------------------------------------------------|--------------|
| Statistical methods | 20a | Statistical methods for analysing primary and secondary outcomes. Reference to where other details of the statistical analysis plan can be found, if not in the protocol | _____10_____ |
|---------------------|-----|--------------------------------------------------------------------------------------------------------------------------------------------------------------------------|--------------|

|  |     |                                                                          |              |
|--|-----|--------------------------------------------------------------------------|--------------|
|  | 20b | Methods for any additional analyses (eg, subgroup and adjusted analyses) | _____10_____ |
|--|-----|--------------------------------------------------------------------------|--------------|

|  |     |                                                                                                                                                                                 |             |
|--|-----|---------------------------------------------------------------------------------------------------------------------------------------------------------------------------------|-------------|
|  | 20c | Definition of analysis population relating to protocol non-adherence (eg, as randomised analysis), and any statistical methods to handle missing data (eg, multiple imputation) | _____6_____ |
|--|-----|---------------------------------------------------------------------------------------------------------------------------------------------------------------------------------|-------------|

**Methods: Monitoring**

|                 |     |                                                                                                                                                                                                                                                                                                                                       |              |
|-----------------|-----|---------------------------------------------------------------------------------------------------------------------------------------------------------------------------------------------------------------------------------------------------------------------------------------------------------------------------------------|--------------|
| Data monitoring | 21a | Composition of data monitoring committee (DMC); summary of its role and reporting structure; statement of whether it is independent from the sponsor and competing interests; and reference to where further details about its charter can be found, if not in the protocol. Alternatively, an explanation of why a DMC is not needed | _____10_____ |
|-----------------|-----|---------------------------------------------------------------------------------------------------------------------------------------------------------------------------------------------------------------------------------------------------------------------------------------------------------------------------------------|--------------|

|  |     |                                                                                                                                                                         |              |
|--|-----|-------------------------------------------------------------------------------------------------------------------------------------------------------------------------|--------------|
|  | 21b | Description of any interim analyses and stopping guidelines, including who will have access to these interim results and make the final decision to terminate the trial | _____10_____ |
|--|-----|-------------------------------------------------------------------------------------------------------------------------------------------------------------------------|--------------|

|       |    |                                                                                                                                                                                   |              |
|-------|----|-----------------------------------------------------------------------------------------------------------------------------------------------------------------------------------|--------------|
| Harms | 22 | Plans for collecting, assessing, reporting, and managing solicited and spontaneously reported adverse events and other unintended effects of trial interventions or trial conduct | _____10_____ |
|-------|----|-----------------------------------------------------------------------------------------------------------------------------------------------------------------------------------|--------------|

|          |    |                                                                                                                                             |              |
|----------|----|---------------------------------------------------------------------------------------------------------------------------------------------|--------------|
| Auditing | 23 | Frequency and procedures for auditing trial conduct, if any, and whether the process will be independent from investigators and the sponsor | _____NA_____ |
|----------|----|---------------------------------------------------------------------------------------------------------------------------------------------|--------------|

**Ethics and dissemination**

|                          |    |                                                                                           |              |
|--------------------------|----|-------------------------------------------------------------------------------------------|--------------|
| Research ethics approval | 24 | Plans for seeking research ethics committee/institutional review board (REC/IRB) approval | _____11_____ |
|--------------------------|----|-------------------------------------------------------------------------------------------|--------------|

|                     |    |                                                                                                                                                                                                                                  |             |
|---------------------|----|----------------------------------------------------------------------------------------------------------------------------------------------------------------------------------------------------------------------------------|-------------|
| Protocol amendments | 25 | Plans for communicating important protocol modifications (eg, changes to eligibility criteria, outcomes, analyses) to relevant parties (eg, investigators, REC/IRBs, trial participants, trial registries, journals, regulators) | _____4_____ |
|---------------------|----|----------------------------------------------------------------------------------------------------------------------------------------------------------------------------------------------------------------------------------|-------------|

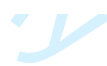

|    |                               |     |                                                                                                                                                                                                                                                                                     |                |
|----|-------------------------------|-----|-------------------------------------------------------------------------------------------------------------------------------------------------------------------------------------------------------------------------------------------------------------------------------------|----------------|
| 1  |                               |     |                                                                                                                                                                                                                                                                                     |                |
| 2  |                               |     |                                                                                                                                                                                                                                                                                     |                |
| 3  | Consent or assent             | 26a | Who will obtain informed consent or assent from potential trial participants or authorised surrogates, and how (see Item 32)                                                                                                                                                        | _____11_____   |
| 4  |                               |     |                                                                                                                                                                                                                                                                                     |                |
| 5  |                               |     |                                                                                                                                                                                                                                                                                     |                |
| 6  |                               | 26b | Additional consent provisions for collection and use of participant data and biological specimens in ancillary studies, if applicable                                                                                                                                               | _____11_____   |
| 7  |                               |     |                                                                                                                                                                                                                                                                                     |                |
| 8  | Confidentiality               | 27  | How personal information about potential and enrolled participants will be collected, shared, and maintained in order to protect confidentiality before, during, and after the trial                                                                                                | _____11_____   |
| 9  |                               |     |                                                                                                                                                                                                                                                                                     |                |
| 10 |                               |     |                                                                                                                                                                                                                                                                                     |                |
| 11 | Declaration of interests      | 28  | Financial and other competing interests for principal investigators for the overall trial and each study site                                                                                                                                                                       | _____14_____   |
| 12 |                               |     |                                                                                                                                                                                                                                                                                     |                |
| 13 |                               |     |                                                                                                                                                                                                                                                                                     |                |
| 14 | Access to data                | 29  | Statement of who will have access to the final trial dataset, and disclosure of contractual agreements that limit such access for investigators                                                                                                                                     | _____11_____   |
| 15 |                               |     |                                                                                                                                                                                                                                                                                     |                |
| 16 |                               |     |                                                                                                                                                                                                                                                                                     |                |
| 17 | Ancillary and post-trial care | 30  | Provisions, if any, for ancillary and post-trial care, and for compensation to those who suffer harm from trial participation                                                                                                                                                       | _____10_____   |
| 18 |                               |     |                                                                                                                                                                                                                                                                                     |                |
| 19 |                               |     |                                                                                                                                                                                                                                                                                     |                |
| 20 | Dissemination policy          | 31a | Plans for investigators and sponsor to communicate trial results to participants, healthcare professionals, the public, and other relevant groups (eg, via publication, reporting in results databases, or other data sharing arrangements), including any publication restrictions | _____11_____   |
| 21 |                               |     |                                                                                                                                                                                                                                                                                     |                |
| 22 |                               |     |                                                                                                                                                                                                                                                                                     |                |
| 23 |                               |     |                                                                                                                                                                                                                                                                                     |                |
| 24 |                               |     |                                                                                                                                                                                                                                                                                     |                |
| 25 |                               | 31b | Authorship eligibility guidelines and any intended use of professional writers                                                                                                                                                                                                      | _____13_____   |
| 26 |                               |     |                                                                                                                                                                                                                                                                                     |                |
| 27 |                               | 31c | Plans, if any, for granting public access to the full protocol, participant-level dataset, and statistical code                                                                                                                                                                     | _____NA_____   |
| 28 |                               |     |                                                                                                                                                                                                                                                                                     |                |
| 29 | <b>Appendices</b>             |     |                                                                                                                                                                                                                                                                                     |                |
| 30 |                               |     |                                                                                                                                                                                                                                                                                     |                |
| 31 | Informed consent materials    | 32  | Model consent form and other related documentation given to participants and authorised surrogates                                                                                                                                                                                  | ___Appendix___ |
| 32 |                               |     |                                                                                                                                                                                                                                                                                     |                |
| 33 |                               |     |                                                                                                                                                                                                                                                                                     |                |
| 34 | Biological specimens          | 33  | Plans for collection, laboratory evaluation, and storage of biological specimens for genetic or molecular analysis in the current trial and for future use in ancillary studies, if applicable                                                                                      | _____NA_____   |
| 35 |                               |     |                                                                                                                                                                                                                                                                                     |                |
| 36 |                               |     |                                                                                                                                                                                                                                                                                     |                |

37 \*It is strongly recommended that this checklist be read in conjunction with the SPIRIT 2013 Explanation & Elaboration for important clarification on the items.  
 38 Amendments to the protocol should be tracked and dated. The SPIRIT checklist is copyrighted by the SPIRIT Group under the Creative Commons  
 39 "[Attribution-NonCommercial-NoDerivs 3.0 Unported](https://creativecommons.org/licenses/by-nc-nd/3.0/)" license.  
 40



# BMJ Open

## A single-arm, open-label, dose-escalation Phase I study to evaluate the safety of an herbal medicine SH003 in patients with solid cancer: a study protocol

|                                 |                                                                                                                                                                                                                                                                                                                                                                                                                                                                                                                                                                                                             |
|---------------------------------|-------------------------------------------------------------------------------------------------------------------------------------------------------------------------------------------------------------------------------------------------------------------------------------------------------------------------------------------------------------------------------------------------------------------------------------------------------------------------------------------------------------------------------------------------------------------------------------------------------------|
| Journal:                        | <i>BMJ Open</i>                                                                                                                                                                                                                                                                                                                                                                                                                                                                                                                                                                                             |
| Manuscript ID                   | bmjopen-2017-019502.R1                                                                                                                                                                                                                                                                                                                                                                                                                                                                                                                                                                                      |
| Article Type:                   | Protocol                                                                                                                                                                                                                                                                                                                                                                                                                                                                                                                                                                                                    |
| Date Submitted by the Author:   | 31-Jan-2018                                                                                                                                                                                                                                                                                                                                                                                                                                                                                                                                                                                                 |
| Complete List of Authors:       | Cheon, Chunhoo; Kyung Hee University, Department of Korean Preventive Medicine<br>Kang, Sohyeon; Kyung Hee University, Department of Korean Preventive Medicine<br>Ko, Youme; Kyung Hee University, Department of Korean Preventive Medicine<br>Kim, Mia; Kyung Hee University, Department of Cardiovascular and Neurologic disease (Stroke center)<br>Jang, Bo-Hyoung; Kyung Hee University, Department of Korean Preventive Medicine<br>Shin, Yong-Cheol; Kyung Hee University, Department of Korean Preventive Medicine<br>Ko, Seong-Gyu; Kyung Hee University, Department of Korean Preventive Medicine |
| <b>Primary Subject Heading</b>: | Complementary medicine                                                                                                                                                                                                                                                                                                                                                                                                                                                                                                                                                                                      |
| Secondary Subject Heading:      | Oncology                                                                                                                                                                                                                                                                                                                                                                                                                                                                                                                                                                                                    |
| Keywords:                       | Herbal medicine < THERAPEUTICS, ONCOLOGY, COMPLEMENTARY MEDICINE                                                                                                                                                                                                                                                                                                                                                                                                                                                                                                                                            |
|                                 |                                                                                                                                                                                                                                                                                                                                                                                                                                                                                                                                                                                                             |

SCHOLARONE™  
Manuscripts

# A single-arm, open-label, dose-escalation Phase I study to evaluate the safety of an herbal medicine SH003 in patients with solid cancer: a study protocol

Chunhoo Cheon<sup>1</sup>, Sohyeon Kang<sup>1</sup>, Youme Ko<sup>1</sup>, Mia Kim<sup>2</sup>, Bo-Hyoung Jang<sup>1</sup>, Yong-Cheol Shin<sup>1</sup> and Seong-Gyu Ko<sup>1§</sup>

<sup>1</sup> Department of Korean Preventive Medicine, Graduate School, Kyung Hee University, Seoul, Republic of Korea

<sup>2</sup> Department of Cardiovascular and Neurologic disease (Stroke center), College of Korean Medicine, Kyung Hee University, Seoul, Republic of Korea

§Corresponding author

Email addresses:

CC: hreedom35@gmail.com

SK: kangsohyeon@gmail.com

YMK: ymymko84@gmail.com

BHJ: bhjang@khu.ac.kr

YCS: syc99@khu.ac.kr

SGK: epiko@khu.ac.kr

Correspondence to

Professor Seong-Gyu Ko; epiko@khu.ac.kr, 26, Kyungheedaero, Dongdaemun-gu, Seoul, 02447, Korea Tel. +82-2-961-9278

Word count: 2,732

1  
2  
3  
4 Abstract

5  
6 **Introduction**

7 Cancer is a major health problem worldwide and the leading cause of death in many countries.

8  
9 The number of patients with cancer and socioeconomic costs of cancer continues to increase.

10  
11 SH003 is a novel herbal medicine consisting of *Astragalus membranaceus*, *Angelica gigas*,  
12  
13 and *Trichosanthes Kirilowii Maximowicz*. Preclinical studies have shown that SH003 has  
14  
15 therapeutic anticancer effects. The aim of this study is to determine the maximum tolerated  
16  
17 dose of SH003 in patients with solid cancers.  
18  
19

20  
21 **Methods and analysis**

22 This study is an open-label, dose-escalation trial evaluating the safety and tolerability of  
23  
24 SH003. The traditional 3+3 dose-escalation design will be implemented. Patients with solid  
25  
26 cancers will be recruited. According to dose level, the patients will receive 1 to 3 tablets of  
27  
28 SH003 3 times-a-day for 3 weeks. Toxicity will be evaluated using common terminology  
29  
30 criteria for adverse events (CTCAE). Dose-limiting toxicities are defined as Grade 3 or  
31  
32 higher adverse events based on CTCAE. The maximum tolerated dose will be determined by  
33  
34 the highest dose at which no more than 1 of 6 patients experiences dose-limiting toxicity.  
35  
36  
37

38  
39 **Ethics and dissemination**

40 This study has been approved by the institutional review board of the Ajou University  
41  
42 Hospital (reference AJIRB-MED-CT1-16-311). The results of this study will be disseminated  
43  
44 through a scientific journal and a conference.  
45  
46

47 **Trial registrations**

48 ClinicalTrials.gov NCT03081819  
49  
50  
51  
52  
53  
54  
55  
56

## Strengths and limitations of this study

- This is the first human study to examine the safety and feasibility of administering SH003 to treat patients with solid cancers.
- The present study is the first Phase I study to determine the maximum tolerated dose of an herbal medicine in Korea.
- Limitations of this study are that pharmacokinetic and pharmacodynamic studies could not be conducted due to the nature of the drug.

## INTRODUCTION

Cancer, which is caused by an uncontrolled division of abnormal cells in a part of the body, is a leading cause of death globally, accounting for 8.8 million deaths in 2015.<sup>1</sup> Moreover, the economic cost of cancer is increasing. In 2010, the total economic cost of cancer was calculated at approximately 1.16 trillion US dollars.<sup>2</sup> In Korea, there were 1.46 million patients with cancer, and 9.57% of people aged 65 and older were patients with cancer.<sup>3</sup> The Korea National Health Insurance Service reported that the socioeconomic cost of cancer was more than 12.1 billion US dollars in 2012, which accounted for 43.2% of the socioeconomic costs of the five major causes of death.<sup>4</sup>

Although many investigations and development of several anticancer drugs have been conducted, the global market for cancer treatment is continuing to grow due to unmet needs. Therefore, many herbal medicines have received attention as potential new anticancer drugs. SH003 is a mixed herbal extract containing Huang-Qi (*Astragalus membranaceus*), Dang-Gui (*Angelica gigas*), and Gua-Lou-Gen (*Trichosanthes Kirilowii Maximowicz*), which are traditionally used in Korean medicine. Huang-Qi has been reported to be effective in cancer treatment in many previous studies.<sup>5</sup> Dang-Gui enhances chemosensitivity in ovarian cancer cells by inhibition of P-glycoprotein expression.<sup>6</sup> Gua-Lou-Gen has shown anti-tumour activity in cancer cells.<sup>7</sup> According to the theoretical framework of Korean medicine, Huang-

1  
2  
3  
4 Qi has the effect of tonifying qi, Dang-Gui has the function of tonifying blood, and Gua-Lou-  
5  
6 Gen has the effects of disperse swelling and expel pus.<sup>8</sup> Therefore, the combination of those  
7  
8 herbs is expected to be effective in the treatment of cancer patients.

9  
10 It has been reported that SH003 suppresses breast cancer growth and metastasis by inducing  
11  
12 autophagy<sup>9</sup> and inhibiting STAT3-IL-6 signaling.<sup>10</sup> Moreover, it represses tumour  
13  
14 angiogenesis by inhibiting VEGF-induced VEGFR2 activation,<sup>11</sup> and induces apoptosis of  
15  
16 prostate cancer cells by inhibiting ERK2-mediated signalling.<sup>12</sup> *In vivo* xenograft studies have  
17  
18 reported that SH003 inhibits tumour growth and metastasis,<sup>10</sup> as well as VEGF-induced tumour  
19  
20 angiogenesis<sup>11</sup> without detectable toxicity, and SH003 in combination with doxorubicin has shown a  
21  
22 synergistic effect in treating triple-negative breast cancer (TNBC).<sup>13</sup> Moreover, no toxicity was  
23  
24 detected in the efficacy studies. In one toxicity test, hypertrophy of the liver was observed;  
25  
26 however, it was deemed to be a reversible change with no toxicological significance.<sup>9</sup>  
27  
28 However, an herbology textbook has mentioned that components of SH003 should be used  
29  
30 with caution in patients with diarrhoea.<sup>8</sup>

31  
32  
33 SH003 has never been tested in humans before; therefore, we have designed a Phase I dose-  
34  
35 escalation study to evaluate the maximum tolerated dose (MTD) of SH003 in patients with  
36  
37 solid cancers.  
38  
39  
40  
41  
42

## 43 **METHODS**

### 44 **Study design**

45  
46  
47 A Phase I dose-escalation study will be conducted at the Ajou University Hospital in Suwon,  
48  
49 Republic of Korea. Any participants fulfilling the eligibility criteria will be enrolled. The  
50  
51 enrolled participants will be assigned to one of three groups receiving 1200 mg, 2400 mg,  
52  
53 and 4800 mg doses of SH003 per day. These doses represent the measurement of active  
54  
55 ingredients found in a half of one tablet. The dose escalation will follow the modified  
56  
57

1  
2  
3  
4 Fibonacci sequence. The dose will be increased twice by 100% of the preceding dose. Each  
5  
6 participant will be examined for signs and symptoms of any adverse events (AEs) during the  
7  
8 study period. Figure 1 shows the schematic flow of the present study. Protocol amendments  
9  
10 are not expected; however if they are essential, any changes in the study protocol will be  
11  
12 provided to the all investigators via a conference. All modifications will be included in the  
13  
14 final manuscript. The present study was begun in March 2017 and is currently in progress.  
15  
16  
17  
18

### 19 **Recruitment**

20  
21 Subjects will be recruited as follows. Patients who visit the trial site and meet the inclusion  
22  
23 criteria will be recommended to participate in the trial by the physician in charge of the study.  
24  
25 Detailed information on the trial, including the study period, purpose of the study, inclusion  
26  
27 and exclusion criteria, and interventions, will be provided by the investigators.  
28  
29  
30  
31

### 32 **Participants**

#### 33 *Inclusion criteria*

34  
35 Participants meeting the following criteria will be included: those 19 years-of-age and older;  
36  
37 patients with histologically or cytologically confirmed solid cancers; metastatic or  
38  
39 unresectable cancers for which standard curative measures do not exist or are no longer  
40  
41 effective; those with ECOG Performance Status  $\leq 2$ ; life expectancy estimated to be at least  
42  
43 12 weeks; those who have not received chemotherapy or surgery within the last 4 weeks;  
44  
45 those with recovery to haemoglobin  $\geq 8$  g/dL, platelets  $\geq 75,000/\mu\text{L}$ , and absolute neutrophil  
46  
47 count  $\geq 1,500/\mu\text{L}$ ; those patients with the ability to swallow tablets, as well as those with the  
48  
49 ability to understand the study and who are willing to sign a written informed consent  
50  
51  
52  
53  
54  
55  
56 document.

### Exclusion criteria

Patients with the following will be excluded: those with known hypersensitivity to any study drug component, including *Astragalus membranaceus*, *Angelica gigas*, and *Trichosanthes Kirilowii Maximowicz*; patients with acute or chronic infections requiring treatment (active hepatitis A, B, and C viruses, human immunodeficiency virus, tuberculosis); estimated glomerular filtration rate (eGFR) < 60ml/min, aspartate aminotransferase (AST), alanine aminotransferase (ALT), or total bilirubin  $\geq 2.5$  times the institutional upper limit of normal (ULN); patients with uncontrolled cardiovascular diseases (unstable angina, heart failure, myocardial infarction, hypertension that remains uncontrolled: 140/90 mm Hg or higher); patients with active cytomegalovirus infection within the past 4 weeks; patients who have experienced major surgery on cerebrovascular disease such as acute coronary syndrome, stroke, etc., within the past year; pregnant or lactating females and women with childbearing potential; patients who do not agree to either use effective means of contraception or not to donate sperm during the trial and up to 1 month after final administration; patients who are taking anticoagulants or anticonvulsants; those with any psychological, sociological, or geographical conditions that could potentially interfere with their compliance to the study protocol, and, finally, patients who have participated in other clinical trials of medicine or medical devices within the past month.

### Subject withdrawal criteria

The participants who meet the following criteria will be discontinued from the study: those who receive other treatments for anti-cancer purposes; participants who withdraw their consent; those who experience serious AEs related to the investigational drug; those with significant protocol violations during the trial, including detection of eligibility violations;

1  
2  
3  
4 those patients who the investigator decides to terminate for their health. The participant who  
5  
6 has been withdrawn regardless of the investigational product will be replaced by a new  
7  
8 participant.  
9

### 10 11 12 **Sample size** 13

14 The present study is a dose-escalation study that examines the MTD of SH003 for patients  
15 with solid cancers. The, dose-escalation rules for the traditional 3 + 3 design will be  
16 adopted.<sup>14</sup> Three patients will be initially enrolled into a starting dose cohort. If there is no  
17 dose-limiting toxicity (DLT) observed in any of these participants, the study will proceed to  
18 enrol additional participants into the next higher dose cohort. If one participant develops a  
19 DLT at a specific dose, an additional three participants will be enrolled into the same dose  
20 cohort. Development of DLTs in more than 1 of 6 participants at a specific dose will suggest  
21 that the MTD has been exceeded, and further dose escalation will be stopped. The present  
22 study plans to escalate the dose of SH003 up to three times. Thus, at least 3, and up to 18  
23 participants, will be recruited for the study. Three to six participants will be allocated to each  
24 dose of SH003.  
25  
26  
27  
28  
29  
30  
31  
32  
33  
34  
35  
36  
37  
38  
39  
40

### 41 **Allocation** 42

43 The study participants who satisfy the eligibility criteria will be assigned to each cohort in the  
44 order they are recruited. After one cohort has been recruited, the participant enrolment will be  
45 suspended until the end of the study for that cohort to determine whether DLT has occurred.  
46  
47 The recruitment and dose of the following cohort will depend on the outcome of the previous  
48  
49 one.  
50  
51  
52  
53  
54  
55  
56  
57  
58  
59  
60



## Treatment protocol

The participants will receive SH003 for three weeks. They will orally take 1 to 3 tablets with water three times a day after meals for 3 weeks according to their dose level. It should be noted that no abnormal findings related to the investigational product were observed in either the single-dose toxicity study or the repeated-dose toxicity study. Therefore, the no observed adverse effect level (NOAEL) of the investigational product was determined to be 2500 mg/kg for rats. According to the FDA guideline, the maximum recommended starting dose for adults is 2400 mg per day based on a safety factor of 10.<sup>15</sup> Based on the toxicity and efficacy study results, the starting dose was determined to be 1200 mg per day for this study.<sup>10</sup> The participants will be required to return unused investigational products for calculating their compliance. During the study, the participants will be prohibited from receiving other treatments for cancer, including chemotherapy and radiotherapy.

## Interventions

The pharmaceutical company Hanpoong Pharm and Foods Co. Ltd. (Jeonju, Republic of Korea), produces the SH003 in accordance with Korea Good Manufacturing Practice (KGMP) standards. The SH003 used in the present study is a pale yellow-to-brown rectangular tablet. One tablet (total of 800 mg) includes 400mg of solid extracts from *Astragalus membranaceus* · *Angelica gigas* · *Trichosanthes Kirilowii Maximowicz* (1:1:1) 30% ethanol extract.

## Primary outcome measurement

The primary outcome in the present study will be determined by the number of 3 or 4 AEs throughout the study period as measured by the National Cancer Institute (NCI; Bethesda, MD USA) common terminology criteria for adverse events (CTCAE) v4.03.<sup>16</sup> CTCAE is a collection of AEs that commonly occur in oncology. Each AE listed has a grading scale

1  
2  
3  
4 indicating its severity. The AEs for this study will be measured by a trained investigator at  
5  
6 every patient visit, in accordance with standard operating procedures (SOPs). The expected  
7  
8 dose-limiting toxicities include diarrhoea, increases in ALT, and/or AST, febrile neutropenia,  
9  
10 and a decreased platelet count.  
11  
12  
13

### 14 **Secondary outcome measurement**

15  
16 Secondary outcome measurements include the AEs, regardless of grade, throughout the study  
17  
18 period as measured by the NCI CTCAE v4.03 as well as changes in tumour size as assessed  
19  
20 by computed tomography (CT) imaging. The study schedule is detailed in Table 1.  
21  
22  
23  
24  
25  
26  
27  
28  
29  
30  
31  
32  
33  
34  
35  
36  
37  
38  
39  
40  
41  
42  
43  
44  
45  
46  
47  
48  
49  
50  
51  
52  
53  
54  
55  
56  
57  
58  
59  
60

**Table 1 - Study schedule of SH003 Phase I study (4 weeks)**

| TIMEPOINT                    | STUDY PERIOD |                                                                                    |       |        |           |
|------------------------------|--------------|------------------------------------------------------------------------------------|-------|--------|-----------|
|                              | Enrolment    | Treatment Period                                                                   |       |        | Close-out |
|                              | Day -7       | Day 0                                                                              | Day 8 | Day 22 | Day 29    |
| Eligibility screen           | X            |                                                                                    |       |        |           |
| Informed consent             | X            |                                                                                    |       |        |           |
| Allocation                   |              | X                                                                                  |       |        |           |
| SH003                        |              |  |       |        |           |
| Demographic characteristic   | X            |                                                                                    |       |        |           |
| Physical examination         | X            | X                                                                                  | X     | X      | X         |
| Vital signs                  | X            | X                                                                                  | X     | X      | X         |
| Laboratory test              | X            |                                                                                    | X     | X      | X         |
| Electrocardiography          | X            |                                                                                    |       | X      |           |
| Pregnancy test               | X            |                                                                                    |       |        |           |
| Medical/drug use history     | X            |                                                                                    |       |        |           |
| Smoking and drinking history | X            |                                                                                    |       |        |           |
| Computed tomography          | X            |                                                                                    |       |        | X         |
| Compliance calculation       |              |                                                                                    | X     | X      |           |
| Concomitant medication       | X            | X                                                                                  | X     | X      | X         |
| Adverse event                |              |                                                                                    | X     | X      | X         |

### **Safety outcomes**

All variables related to the safety of participants, including vital signs, physical examination, hematologic, biochemical, and urine tests, and AEs will be documented on the case report form (CRF) at every visit. If an AE is severe and associated with the investigational product, the participant will be withdrawn from the study and appropriate therapy will be provided to them. Any loss caused by the present study will be reimbursed by insurance.

### **Outcomes analysis**

#### *Determination of maximum tolerated dose*

MTD will be defined as the dose just below the lowest dose level at which more than 1 out of 6 patients exhibit DLT during the 4 weeks of the trial period. In the present study, the highest dose among the three dose groups (1200 mg, 2400 mg or 4800 mg per day) with one patient or less experiencing DLT will be determined as the MTD of SH003.

All analyses of data from the present study will be descriptive, as the study includes no inferential analysis and general hypothesis testing. The continuous variables will be displayed as the median and range, and the categorical variables will be displayed as the absolute and relative frequencies. After completion of each cohort's study period, an analysis will be conducted to determine the subsequent dose level.

### **Data and safety monitoring**

To maintain the quality of the present study, monitoring will be conducted by the Contract Research Organization (CRO). The institution participating in the present study will be monitored while this trial is in progress through use of SOPs. For data quality improvement, double data entry and range checks for data values will be performed. Suspected and

1  
2  
3  
4 unexpected serious adverse reactions will be reported to the institutional review board (IRB)  
5  
6 and regulatory authorities in the Republic of Korea within 24 hours.  
7  
8  
9

### 10 **Ethics and dissemination**

11  
12 The present study has been approved by the IRB of the Ajou University Hospital (reference  
13  
14 AJIRB-MED-CT1-16-311). The current protocol version is 1.1. Written informed consent  
15  
16 will be obtained from each participant prior to commencement of the trial procedure by the  
17  
18 investigator. Informed consent for the research use of human biological material will also be  
19  
20 obtained for collection, storage, and use of blood samples from participants. The trial will be  
21  
22 performed in compliance with the Helsinki Declaration and according to Good Clinical  
23  
24 Practice as described by the Korea Food and Drug Administration.  
25  
26

27  
28 Confidentiality of patients' personal information will be protected. Each participant will be  
29  
30 given a study identification number upon enrolment. During the trial period, data will be dealt  
31  
32 with by using study identification numbers. During and after the study, all records will be  
33  
34 kept in secure locked cabinets or in password-protected computer files. Only participating  
35  
36 investigators will have the authority to access the data. The results of this study will be  
37  
38 disseminated through an academic journal publication or a scientific conference.  
39  
40  
41  
42  
43  
44  
45

## 46 **DISCUSSION**

47  
48 The present study will investigate the tolerability and safety of administering SH003 to treat  
49  
50 patients with solid cancers. Globally, there were 8.2 million reported deaths from cancer in  
51  
52 2012, and cancer is also the leading cause of mortality in Korea.<sup>17 18</sup> Thus, development of  
53  
54 anti-cancer drugs is active in Korea. Among a total of 628 cases of investigational new drug  
55  
56

1  
2  
3  
4 (IND) approvals in 2016, the number of anti-cancer drugs was the highest, at 202 cases.<sup>19</sup>  
5  
6 Nevertheless, there have been few IND approvals for new herbal medicines as anti-cancer  
7  
8 drugs. In this situation, SH003 received IND approval from the Korean Ministry of Food and  
9  
10 Drug Safety (MFDS) to begin a Phase I trial testing it as anti-cancer drug.

11  
12 In addition to the effect of tumour size-reduction, SH003 has shown much potential as an  
13  
14 anti-cancer agent in preclinical studies. The combination of SH003 and paclitaxel has been  
15  
16 shown to enhance apoptotic cell death in paclitaxel-resistant breast cancer cells by inhibition  
17  
18 of multidrug resistance protein 1 (MDR1) expression.<sup>20</sup> Decursin in Dang-Gui, one of the  
19  
20 constituent herbs of SH003, has been shown to inhibit doxorubicin-resistant ovarian cancer  
21  
22 cell proliferation and induce apoptosis.<sup>6</sup> The combination of SH003 and doxorubicin has  
23  
24 shown synergistic effects in TNBC treatment.<sup>13</sup> Those studies suggest that SH003 could be  
25  
26 used as an anti-MDR tumour agent and in combination with conventional chemotherapy  
27  
28 drugs. SH003 has shown efficacy in treating various cancers, including breast, ovarian, and  
29  
30 prostate cancers. Thus, further clinical studies are necessary to evaluate its effectiveness in  
31  
32 treating various cancers.  
33  
34

35  
36 The present study is particularly significant. First, it is the only Phase I dose-escalation study  
37  
38 conducted to date to determine the MTD for a new herbal medicine in Korea. While there  
39  
40 have been several studies that investigated the anti-cancer effect of herbal medicine, most of  
41  
42 these were preclinical studies or clinical trials to evaluate the effectiveness of established  
43  
44 herbal medicine in treating cancer patients.<sup>21-24</sup> Second, the present study will investigate the  
45  
46 effect of SH003 on changes in tumour size for planning further studies to evaluate its efficacy.

47  
48 Limitations of the present study are that the number of dose levels is relatively small and the  
49  
50 study does not include pharmacokinetics (PK) and pharmacodynamics (PD) research. Due to  
51  
52 the nature of the formulation, a dose exceeding 4 tablets would be inconvenient and may  
53  
54 reduce patient compliance, thus the upper limit of dose level was determined as 4800 mg per  
55  
56

1  
2  
3  
4 day, the third dose level in this study. The effective dose estimated from preclinical studies  
5  
6 was also considered.<sup>10</sup> Most herbal medicines, including SH003, are composed of complex  
7  
8 compounds, and thus, PK and PD studies are not easy.<sup>25</sup> Therefore, it is difficult to collect PK  
9  
10 evidence on dose and frequency of administration of herbal medicines. Based on *in vivo* PK  
11  
12 studies on SH003 currently being performed, further human studies will need to be conducted.  
13  
14 Although the present study has a few limitations, it serves as the first in-human trial to  
15  
16 explore the use of SH003 to treat patients with cancer. Moreover, to the best of our  
17  
18 knowledge, this is the first Phase I study of an herbal medicine in Korea. We, therefore,  
19  
20 expect that the present study could promote the overall development of new herbal medicines  
21  
22 to treat cancer and other devastating diseases.  
23  
24  
25  
26  
27  
28  
29  
30

### 31 **Authors' affiliations**

32 <sup>1</sup> Department of Korean Preventive Medicine, Graduate School, Kyung Hee University, 26,  
33  
34 Kyungheedaero-ro, Dongdaemun-gu, Seoul, Republic of Korea

35  
36 <sup>2</sup> Department of Cardiovascular and Neurologic disease (Stroke center), College of Korean  
37  
38 Medicine, Kyung Hee University, Seoul, Republic of Korea  
39  
40  
41  
42  
43

### 44 **Acknowledgements**

45 We wish to acknowledge Hanpoong Phar. & Foods Co. Ltd. for providing investigational  
46  
47 product support.  
48  
49  
50  
51  
52  
53  
54  
55  
56

## Contributors

CC, SK and YK have written the first manuscript for this trial and they will contribute to monitoring this trial. MK, BHJ and YCS have edited the first manuscript. SGK has conducted all the procedures for this protocol. All authors have read and approved the final manuscript.

## Funding

This research was supported by a grant of the Korea Health Technology R&D Project through the Korea Health Industry Development Institute (KHIDI), funded by the Ministry of Health & Welfare, Republic of Korea (grant number : HI11C2110). The management, analysis and reporting of study will be conducted independently by the study investigators.

## Competing interests

None declared.

## Patients consent

Obtained

## Ethics approval

The Institutional Review Board of the Ajou University Hospital approved the study (reference AJIRB-MED-CT1-16-311).

## Provenance and peer review

Not commissioned; externally peer reviewed.



## References

1. World Health Organization. Cancer, fact sheet. Updated February 2017. World Health Organization, 2017.
2. World Health Organization. World cancer report 2014. Lyon: International Agency for Research on Cancer, 2014.
3. National Cancer Center. National Cancer Information Center 2017. <http://www.cancer.go.kr> (accessed July 2017)
4. Hyun KR, Lee SM. Analysis of Socioeconomic Costs of Five Major Diseases. *Health insurance & policy* 2014;13(2):91-107.
5. Auyeung KK, Han QB, Ko JK. Astragalus membranaceus: A Review of its Protection Against Inflammation and Gastrointestinal Cancers. *Am J Chin Med* 2016;44(1):1-22.
6. Choi HS, Cho SG, Kim MK, et al. Decursin in Angelica gigas Nakai (AGN) Enhances Doxorubicin Chemosensitivity in NCI/ADR-RES Ovarian Cancer Cells via Inhibition of P-glycoprotein Expression. *Phytother Res* 2016;30(12):2020-26.
7. Li J, Li H, Zhang Z, et al. The anti-cancerous activity of recombinant trichosanthin on prostate cancer cell PC3. *Biol Res* 2016;49:21.
8. National College of Korean Medicine Publication Committee on Joint Textbook. Herbology. Seoul, Korea: Younglimsa 2016.
9. Choi YK, Cho SG, Choi YJ, et al. SH003 suppresses breast cancer growth by accumulating p62 in autolysosomes. *Oncotarget* 2016;8(51):88386-88400.
10. Choi YK, Cho SG, Woo SM, et al. Herbal extract SH003 suppresses tumor growth and metastasis of MDA-MB-231 breast cancer cells by inhibiting STAT3-IL-6 signaling. *Mediators Inflamm* 2014;2014:492173.
11. Choi HS, Kim MK, Lee K, et al. SH003 represses tumor angiogenesis by blocking VEGF binding to VEGFR2. *Oncotarget* 2016;7(22):32969-79.
12. Choi YJ, Choi YK, Lee KM, et al. SH003 induces apoptosis of DU145 prostate cancer cells by inhibiting ERK-involved pathway. *BMC Complement Altern Med* 2016;16(1):507.
13. Woo SM, Kim AJ, Choi YK, et al. Synergistic Effect of SH003 and Doxorubicin in Triple-negative Breast Cancer. *Phytother Res* 2016;30(11):1817-23.
14. Storer BE. An evaluation of phase I clinical trial designs in the continuous dose-response setting. *Stat Med* 2001;20(16):2399-408.
15. U.S. Dept. of Health and Human Services, Food and Drug Administration, Center for Drug Evaluation and Research. Guidance for industry estimating the maximum safe starting dose in initial clinical trials for therapeutics in adult healthy volunteers. Rockville, MD. USA: Food and Drug Administration, 2005.
16. U.S. Department of Health and Human Services. Common Terminology Criteria for Adverse Events (CTCAE) v4.03: National Institutes of Health National Cancer Institute, 2010.
17. International Agency for Research on Cancer. GLOBOCAN 2012: Estimated Cancer Incidence, Mortality and Prevalence Worldwide in 2012. World Health Organization, 2012. [http://globocan.iarc.fr/Pages/fact\\_sheets\\_cancer.aspx](http://globocan.iarc.fr/Pages/fact_sheets_cancer.aspx)
18. National Cancer Center. Cancer Facts & Figures 2014. Ministry of Health & Welfare, 2014.
19. Ministry of Food and Drug Safety. MFDS, Results of the Investigational New Drug approval status 2016. Ministry of Food and Drug Safety, 2017.

- 1  
2  
3  
4 20. Choi HS, Cho SG, Kim MK, et al. SH003 enhances paclitaxel chemosensitivity in MCF-  
5 7/PAX breast cancer cells through inhibition of MDR1 activity. *Mol Cell Biochem*  
6 2017;426(1-2):1-8.  
7 21. Kim HY, Kim J, Ha Thi HT, et al. Evaluation of anti-tumorigenic activity of BP3B  
8 against colon cancer with patient-derived tumor xenograft model. *BMC Complement*  
9 *Altern Med* 2016;16(1):473.  
10 22. Choi BY, Joo JC, Lee YK, et al. Anti-cancer effect of *Scutellaria baicalensis* in  
11 combination with cisplatin in human ovarian cancer cell. *BMC Complement Altern*  
12 *Med* 2017;17(1):277.  
13 23. Lee SI, Bae JA, Ko YS, et al. Gejjigajakyak decoction inhibits the motility and  
14 tumorigenesis of colorectal cancer cells. *BMC Complement Altern Med*  
15 2016;16(1):288.  
16 24. Jeong JS, Ryu BH, Kim JS, et al. Bojungikki-tang for cancer-related fatigue: a pilot  
17 randomized clinical trial. *Integr Cancer Ther* 2010;9(4):331-8.  
18 25. Liu WJH. Traditional Herbal Medicine Research Methods: Identification, Analysis,  
19 Bioassay, and Pharmaceutical and Clinical Studies: Wiley 2011.  
20  
21  
22  
23  
24  
25  
26

## 27 List of Figure

28  
29 Figure 1. Study flow chart  
30  
31  
32  
33  
34  
35  
36  
37  
38  
39  
40  
41  
42  
43  
44  
45  
46  
47  
48  
49  
50  
51  
52  
53  
54  
55  
56  
57  
58  
59  
60

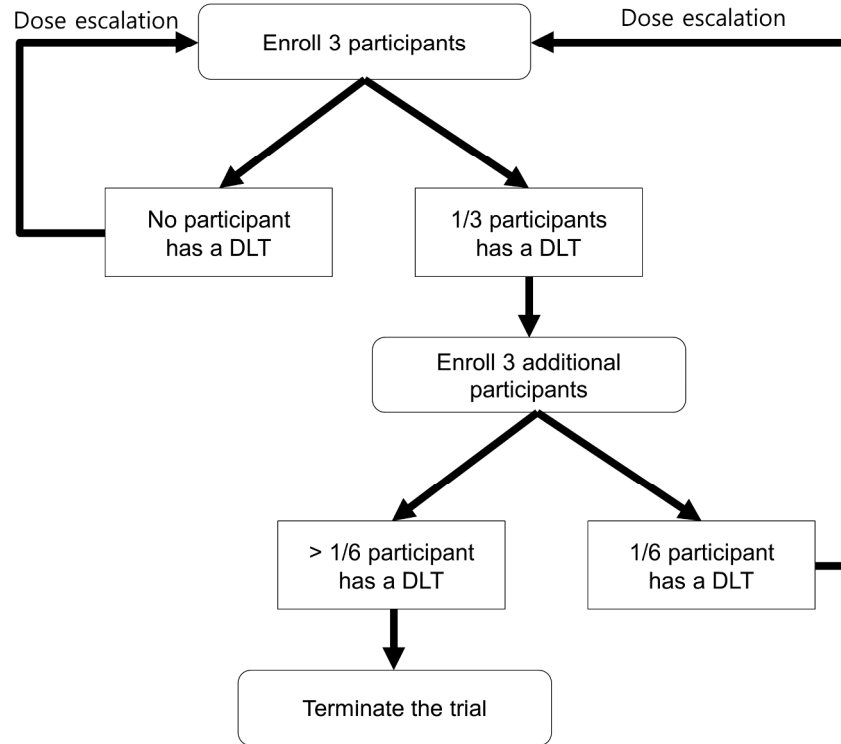

Study flow chart. SH003

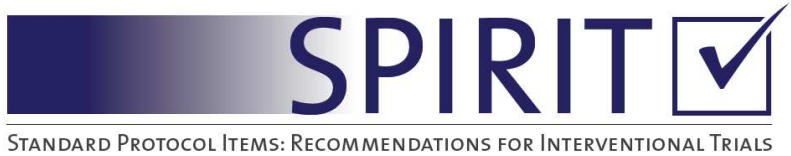

SPIRIT 2013 Checklist: Recommended items to address in a clinical trial protocol and related documents\*

| Section/item                      | Item No | Description                                                                                                                                                                                                                                                                              | Addressed on page number |
|-----------------------------------|---------|------------------------------------------------------------------------------------------------------------------------------------------------------------------------------------------------------------------------------------------------------------------------------------------|--------------------------|
| <b>Administrative information</b> |         |                                                                                                                                                                                                                                                                                          |                          |
| Title                             | 1       | Descriptive title identifying the study design, population, interventions, and, if applicable, trial acronym                                                                                                                                                                             | _____1_____              |
| Trial registration                | 2a      | Trial identifier and registry name. If not yet registered, name of intended registry                                                                                                                                                                                                     | _____2_____              |
|                                   | 2b      | All items from the World Health Organization Trial Registration Data Set                                                                                                                                                                                                                 | ___Appendix___           |
| Protocol version                  | 3       | Date and version identifier                                                                                                                                                                                                                                                              | _____11_____             |
| Funding                           | 4       | Sources and types of financial, material, and other support                                                                                                                                                                                                                              | _____13_____             |
| Roles and responsibilities        | 5a      | Names, affiliations, and roles of protocol contributors                                                                                                                                                                                                                                  | _____13_____             |
|                                   | 5b      | Name and contact information for the trial sponsor                                                                                                                                                                                                                                       | _____13_____             |
|                                   | 5c      | Role of study sponsor and funders, if any, in study design; collection, management, analysis, and interpretation of data; writing of the report; and the decision to submit the report for publication, including whether they will have ultimate authority over any of these activities | _____13_____             |
|                                   | 5d      | Composition, roles, and responsibilities of the coordinating centre, steering committee, endpoint adjudication committee, data management team, and other individuals or groups overseeing the trial, if applicable (see Item 21a for data monitoring committee)                         | _____NA_____             |

## Introduction

|                          |    |                                                                                                                                                                                                           |     |
|--------------------------|----|-----------------------------------------------------------------------------------------------------------------------------------------------------------------------------------------------------------|-----|
| Background and rationale | 6a | Description of research question and justification for undertaking the trial, including summary of relevant studies (published and unpublished) examining benefits and harms for each intervention        | 3-4 |
|                          | 6b | Explanation for choice of comparators                                                                                                                                                                     | NA  |
| Objectives               | 7  | Specific objectives or hypotheses                                                                                                                                                                         | 4   |
| Trial design             | 8  | Description of trial design including type of trial (eg, parallel group, crossover, factorial, single group), allocation ratio, and framework (eg, superiority, equivalence, noninferiority, exploratory) | 4   |

## Methods: Participants, interventions, and outcomes

|                      |     |                                                                                                                                                                                                                                                                                                                                                                                |     |
|----------------------|-----|--------------------------------------------------------------------------------------------------------------------------------------------------------------------------------------------------------------------------------------------------------------------------------------------------------------------------------------------------------------------------------|-----|
| Study setting        | 9   | Description of study settings (eg, community clinic, academic hospital) and list of countries where data will be collected. Reference to where list of study sites can be obtained                                                                                                                                                                                             | 4   |
| Eligibility criteria | 10  | Inclusion and exclusion criteria for participants. If applicable, eligibility criteria for study centres and individuals who will perform the interventions (eg, surgeons, psychotherapists)                                                                                                                                                                                   | 5-6 |
| Interventions        | 11a | Interventions for each group with sufficient detail to allow replication, including how and when they will be administered                                                                                                                                                                                                                                                     | 7   |
|                      | 11b | Criteria for discontinuing or modifying allocated interventions for a given trial participant (eg, drug dose change in response to harms, participant request, or improving/worsening disease)                                                                                                                                                                                 | 6   |
|                      | 11c | Strategies to improve adherence to intervention protocols, and any procedures for monitoring adherence (eg, drug tablet return, laboratory tests)                                                                                                                                                                                                                              | 7   |
|                      | 11d | Relevant concomitant care and interventions that are permitted or prohibited during the trial                                                                                                                                                                                                                                                                                  | 7   |
| Outcomes             | 12  | Primary, secondary, and other outcomes, including the specific measurement variable (eg, systolic blood pressure), analysis metric (eg, change from baseline, final value, time to event), method of aggregation (eg, median, proportion), and time point for each outcome. Explanation of the clinical relevance of chosen efficacy and harm outcomes is strongly recommended | 8   |
| Participant timeline | 13  | Time schedule of enrolment, interventions (including any run-ins and washouts), assessments, and visits for participants. A schematic diagram is highly recommended (see Figure)                                                                                                                                                                                               | 9   |

1  
2  
3 Sample size 14 Estimated number of participants needed to achieve study objectives and how it was determined, including \_\_\_\_\_6\_\_\_\_\_  
4 clinical and statistical assumptions supporting any sample size calculations

5  
6 Recruitment 15 Strategies for achieving adequate participant enrolment to reach target sample size \_\_\_\_\_5\_\_\_\_\_  
7

8 **Methods: Assignment of interventions (for controlled trials)**  
9

10 Allocation:

11 Sequence generation 16a Method of generating the allocation sequence (eg, computer-generated random numbers), and list of any \_\_\_\_\_NA\_\_\_\_\_  
12 factors for stratification. To reduce predictability of a random sequence, details of any planned restriction  
13 (eg, blocking) should be provided in a separate document that is unavailable to those who enrol participants  
14 or assign interventions  
15

16  
17 Allocation concealment mechanism 16b Mechanism of implementing the allocation sequence (eg, central telephone; sequentially numbered, \_\_\_\_\_NA\_\_\_\_\_  
18 opaque, sealed envelopes), describing any steps to conceal the sequence until interventions are assigned  
19

20  
21 Implementation 16c Who will generate the allocation sequence, who will enrol participants, and who will assign participants to \_\_\_\_\_NA\_\_\_\_\_  
22 interventions  
23

24 Blinding (masking) 17a Who will be blinded after assignment to interventions (eg, trial participants, care providers, outcome \_\_\_\_\_NA\_\_\_\_\_  
25 assessors, data analysts), and how  
26

27 17b If blinded, circumstances under which unblinding is permissible, and procedure for revealing a participant's \_\_\_\_\_NA\_\_\_\_\_  
28 allocated intervention during the trial  
29

30  
31 **Methods: Data collection, management, and analysis**  
32

33 Data collection methods 18a Plans for assessment and collection of outcome, baseline, and other trial data, including any related \_\_\_\_\_8\_\_\_\_\_  
34 processes to promote data quality (eg, duplicate measurements, training of assessors) and a description of  
35 study instruments (eg, questionnaires, laboratory tests) along with their reliability and validity, if known.  
36 Reference to where data collection forms can be found, if not in the protocol  
37

38 18b Plans to promote participant retention and complete follow-up, including list of any outcome data to be \_\_\_\_\_6\_\_\_\_\_  
39 collected for participants who discontinue or deviate from intervention protocols  
40  
41  
42  
43  
44

|    |                     |     |                                                                                                                                                                                                                                                                   |              |
|----|---------------------|-----|-------------------------------------------------------------------------------------------------------------------------------------------------------------------------------------------------------------------------------------------------------------------|--------------|
| 1  |                     |     |                                                                                                                                                                                                                                                                   |              |
| 2  |                     |     |                                                                                                                                                                                                                                                                   |              |
| 3  | Data management     | 19  | Plans for data entry, coding, security, and storage, including any related processes to promote data quality (eg, double data entry; range checks for data values). Reference to where details of data management procedures can be found, if not in the protocol | _____10_____ |
| 4  |                     |     |                                                                                                                                                                                                                                                                   |              |
| 5  |                     |     |                                                                                                                                                                                                                                                                   |              |
| 6  |                     |     |                                                                                                                                                                                                                                                                   |              |
| 7  | Statistical methods | 20a | Statistical methods for analysing primary and secondary outcomes. Reference to where other details of the statistical analysis plan can be found, if not in the protocol                                                                                          | _____10_____ |
| 8  |                     |     |                                                                                                                                                                                                                                                                   |              |
| 9  |                     |     |                                                                                                                                                                                                                                                                   |              |
| 10 |                     | 20b | Methods for any additional analyses (eg, subgroup and adjusted analyses)                                                                                                                                                                                          | _____10_____ |
| 11 |                     |     |                                                                                                                                                                                                                                                                   |              |
| 12 |                     | 20c | Definition of analysis population relating to protocol non-adherence (eg, as randomised analysis), and any statistical methods to handle missing data (eg, multiple imputation)                                                                                   | _____6_____  |
| 13 |                     |     |                                                                                                                                                                                                                                                                   |              |
| 14 |                     |     |                                                                                                                                                                                                                                                                   |              |

### 15 **Methods: Monitoring**

|    |                 |     |                                                                                                                                                                                                                                                                                                                                       |              |
|----|-----------------|-----|---------------------------------------------------------------------------------------------------------------------------------------------------------------------------------------------------------------------------------------------------------------------------------------------------------------------------------------|--------------|
| 16 |                 |     |                                                                                                                                                                                                                                                                                                                                       |              |
| 17 | Data monitoring | 21a | Composition of data monitoring committee (DMC); summary of its role and reporting structure; statement of whether it is independent from the sponsor and competing interests; and reference to where further details about its charter can be found, if not in the protocol. Alternatively, an explanation of why a DMC is not needed | _____10_____ |
| 18 |                 |     |                                                                                                                                                                                                                                                                                                                                       |              |
| 19 |                 |     |                                                                                                                                                                                                                                                                                                                                       |              |
| 20 |                 |     |                                                                                                                                                                                                                                                                                                                                       |              |
| 21 |                 |     |                                                                                                                                                                                                                                                                                                                                       |              |
| 22 |                 | 21b | Description of any interim analyses and stopping guidelines, including who will have access to these interim results and make the final decision to terminate the trial                                                                                                                                                               | _____10_____ |
| 23 |                 |     |                                                                                                                                                                                                                                                                                                                                       |              |
| 24 |                 |     |                                                                                                                                                                                                                                                                                                                                       |              |
| 25 | Harms           | 22  | Plans for collecting, assessing, reporting, and managing solicited and spontaneously reported adverse events and other unintended effects of trial interventions or trial conduct                                                                                                                                                     | _____10_____ |
| 26 |                 |     |                                                                                                                                                                                                                                                                                                                                       |              |
| 27 |                 |     |                                                                                                                                                                                                                                                                                                                                       |              |
| 28 | Auditing        | 23  | Frequency and procedures for auditing trial conduct, if any, and whether the process will be independent from investigators and the sponsor                                                                                                                                                                                           | _____NA_____ |
| 29 |                 |     |                                                                                                                                                                                                                                                                                                                                       |              |
| 30 |                 |     |                                                                                                                                                                                                                                                                                                                                       |              |
| 31 |                 |     |                                                                                                                                                                                                                                                                                                                                       |              |

### 32 **Ethics and dissemination**

|    |                          |    |                                                                                                                                                                                                                                  |              |
|----|--------------------------|----|----------------------------------------------------------------------------------------------------------------------------------------------------------------------------------------------------------------------------------|--------------|
| 33 |                          |    |                                                                                                                                                                                                                                  |              |
| 34 | Research ethics approval | 24 | Plans for seeking research ethics committee/institutional review board (REC/IRB) approval                                                                                                                                        | _____11_____ |
| 35 |                          |    |                                                                                                                                                                                                                                  |              |
| 36 |                          |    |                                                                                                                                                                                                                                  |              |
| 37 | Protocol amendments      | 25 | Plans for communicating important protocol modifications (eg, changes to eligibility criteria, outcomes, analyses) to relevant parties (eg, investigators, REC/IRBs, trial participants, trial registries, journals, regulators) | _____4_____  |
| 38 |                          |    |                                                                                                                                                                                                                                  |              |
| 39 |                          |    |                                                                                                                                                                                                                                  |              |
| 40 |                          |    |                                                                                                                                                                                                                                  |              |
| 41 |                          |    |                                                                                                                                                                                                                                  |              |
| 42 |                          |    |                                                                                                                                                                                                                                  |              |
| 43 |                          |    |                                                                                                                                                                                                                                  |              |
| 44 |                          |    |                                                                                                                                                                                                                                  |              |
| 45 |                          |    |                                                                                                                                                                                                                                  |              |
| 46 |                          |    |                                                                                                                                                                                                                                  |              |
| 47 |                          |    |                                                                                                                                                                                                                                  |              |

|    |                               |     |                                                                                                                                                                                                                                                                                     |                |
|----|-------------------------------|-----|-------------------------------------------------------------------------------------------------------------------------------------------------------------------------------------------------------------------------------------------------------------------------------------|----------------|
| 1  |                               |     |                                                                                                                                                                                                                                                                                     |                |
| 2  |                               |     |                                                                                                                                                                                                                                                                                     |                |
| 3  | Consent or assent             | 26a | Who will obtain informed consent or assent from potential trial participants or authorised surrogates, and how (see Item 32)                                                                                                                                                        | _____11_____   |
| 4  |                               |     |                                                                                                                                                                                                                                                                                     |                |
| 5  |                               |     |                                                                                                                                                                                                                                                                                     |                |
| 6  |                               | 26b | Additional consent provisions for collection and use of participant data and biological specimens in ancillary studies, if applicable                                                                                                                                               | _____11_____   |
| 7  |                               |     |                                                                                                                                                                                                                                                                                     |                |
| 8  | Confidentiality               | 27  | How personal information about potential and enrolled participants will be collected, shared, and maintained in order to protect confidentiality before, during, and after the trial                                                                                                | _____11_____   |
| 9  |                               |     |                                                                                                                                                                                                                                                                                     |                |
| 10 |                               |     |                                                                                                                                                                                                                                                                                     |                |
| 11 | Declaration of interests      | 28  | Financial and other competing interests for principal investigators for the overall trial and each study site                                                                                                                                                                       | _____14_____   |
| 12 |                               |     |                                                                                                                                                                                                                                                                                     |                |
| 13 |                               |     |                                                                                                                                                                                                                                                                                     |                |
| 14 | Access to data                | 29  | Statement of who will have access to the final trial dataset, and disclosure of contractual agreements that limit such access for investigators                                                                                                                                     | _____11_____   |
| 15 |                               |     |                                                                                                                                                                                                                                                                                     |                |
| 16 |                               |     |                                                                                                                                                                                                                                                                                     |                |
| 17 | Ancillary and post-trial care | 30  | Provisions, if any, for ancillary and post-trial care, and for compensation to those who suffer harm from trial participation                                                                                                                                                       | _____10_____   |
| 18 |                               |     |                                                                                                                                                                                                                                                                                     |                |
| 19 |                               |     |                                                                                                                                                                                                                                                                                     |                |
| 20 | Dissemination policy          | 31a | Plans for investigators and sponsor to communicate trial results to participants, healthcare professionals, the public, and other relevant groups (eg, via publication, reporting in results databases, or other data sharing arrangements), including any publication restrictions | _____11_____   |
| 21 |                               |     |                                                                                                                                                                                                                                                                                     |                |
| 22 |                               |     |                                                                                                                                                                                                                                                                                     |                |
| 23 |                               |     |                                                                                                                                                                                                                                                                                     |                |
| 24 |                               |     |                                                                                                                                                                                                                                                                                     |                |
| 25 |                               | 31b | Authorship eligibility guidelines and any intended use of professional writers                                                                                                                                                                                                      | _____13_____   |
| 26 |                               |     |                                                                                                                                                                                                                                                                                     |                |
| 27 |                               | 31c | Plans, if any, for granting public access to the full protocol, participant-level dataset, and statistical code                                                                                                                                                                     | _____NA_____   |
| 28 |                               |     |                                                                                                                                                                                                                                                                                     |                |
| 29 | <b>Appendices</b>             |     |                                                                                                                                                                                                                                                                                     |                |
| 30 |                               |     |                                                                                                                                                                                                                                                                                     |                |
| 31 | Informed consent materials    | 32  | Model consent form and other related documentation given to participants and authorised surrogates                                                                                                                                                                                  | ___Appendix___ |
| 32 |                               |     |                                                                                                                                                                                                                                                                                     |                |
| 33 |                               |     |                                                                                                                                                                                                                                                                                     |                |
| 34 | Biological specimens          | 33  | Plans for collection, laboratory evaluation, and storage of biological specimens for genetic or molecular analysis in the current trial and for future use in ancillary studies, if applicable                                                                                      | _____NA_____   |
| 35 |                               |     |                                                                                                                                                                                                                                                                                     |                |
| 36 |                               |     |                                                                                                                                                                                                                                                                                     |                |

37 \*It is strongly recommended that this checklist be read in conjunction with the SPIRIT 2013 Explanation & Elaboration for important clarification on the items.  
 38 Amendments to the protocol should be tracked and dated. The SPIRIT checklist is copyrighted by the SPIRIT Group under the Creative Commons  
 39 "[Attribution-NonCommercial-NoDerivs 3.0 Unported](https://creativecommons.org/licenses/by-nc-nd/3.0/)" license.  
 40



# BMJ Open

## A single-arm, open-label, dose-escalation Phase I study to evaluate the safety of an herbal medicine SH003 in patients with solid cancer: a study protocol

|                                 |                                                                                                                                                                                                                                                                                                                                                                                                                                                                                                                                                                                                             |
|---------------------------------|-------------------------------------------------------------------------------------------------------------------------------------------------------------------------------------------------------------------------------------------------------------------------------------------------------------------------------------------------------------------------------------------------------------------------------------------------------------------------------------------------------------------------------------------------------------------------------------------------------------|
| Journal:                        | <i>BMJ Open</i>                                                                                                                                                                                                                                                                                                                                                                                                                                                                                                                                                                                             |
| Manuscript ID                   | bmjopen-2017-019502.R2                                                                                                                                                                                                                                                                                                                                                                                                                                                                                                                                                                                      |
| Article Type:                   | Protocol                                                                                                                                                                                                                                                                                                                                                                                                                                                                                                                                                                                                    |
| Date Submitted by the Author:   | 28-Feb-2018                                                                                                                                                                                                                                                                                                                                                                                                                                                                                                                                                                                                 |
| Complete List of Authors:       | Cheon, Chunhoo; Kyung Hee University, Department of Korean Preventive Medicine<br>Kang, Sohyeon; Kyung Hee University, Department of Korean Preventive Medicine<br>Ko, Youme; Kyung Hee University, Department of Korean Preventive Medicine<br>Kim, Mia; Kyung Hee University, Department of Cardiovascular and Neurologic disease (Stroke center)<br>Jang, Bo-Hyoung; Kyung Hee University, Department of Korean Preventive Medicine<br>Shin, Yong-Cheol; Kyung Hee University, Department of Korean Preventive Medicine<br>Ko, Seong-Gyu; Kyung Hee University, Department of Korean Preventive Medicine |
| <b>Primary Subject Heading</b>: | Complementary medicine                                                                                                                                                                                                                                                                                                                                                                                                                                                                                                                                                                                      |
| Secondary Subject Heading:      | Oncology                                                                                                                                                                                                                                                                                                                                                                                                                                                                                                                                                                                                    |
| Keywords:                       | Herbal medicine < THERAPEUTICS, ONCOLOGY, COMPLEMENTARY MEDICINE, Clinical trials < THERAPEUTICS                                                                                                                                                                                                                                                                                                                                                                                                                                                                                                            |
|                                 |                                                                                                                                                                                                                                                                                                                                                                                                                                                                                                                                                                                                             |

SCHOLARONE™  
Manuscripts

# A single-arm, open-label, dose-escalation Phase I study to evaluate the safety of an herbal medicine SH003 in patients with solid cancer: a study protocol

Chunhoo Cheon<sup>1</sup>, Sohyeon Kang<sup>1</sup>, Youme Ko<sup>1</sup>, Mia Kim<sup>2</sup>, Bo-Hyoung Jang<sup>1</sup>, Yong-Cheol Shin<sup>1</sup> and Seong-Gyu Ko<sup>1§</sup>

<sup>1</sup> Department of Korean Preventive Medicine, College of Korean Medicine, Kyung Hee University, Seoul, Republic of Korea

<sup>2</sup> Department of Cardiovascular and Neurologic disease (Stroke center), College of Korean Medicine, Kyung Hee University, Seoul, Republic of Korea

§Corresponding author

Email addresses:

CC: hreedom35@gmail.com

SK: kangsohyeon@gmail.com

YMK: ymymko84@gmail.com

BHJ: bhjang@khu.ac.kr

YCS: syc99@khu.ac.kr

SGK: epiko@khu.ac.kr

Correspondence to

Professor Seong-Gyu Ko; epiko@khu.ac.kr, 26, Kyungheedaero, Dongdaemun-gu, Seoul, 02447, Korea Tel. +82-2-961-9278

Word count: 2,845

1  
2  
3  
4 Abstract

5  
6 **Introduction**

7 Cancer is a major health problem worldwide and the leading cause of death in many countries.

8  
9 The number of patients with cancer and socioeconomic costs of cancer continues to increase.

10  
11 SH003 is a novel herbal medicine consisting of *Astragalus membranaceus*, *Angelica gigas*,

12  
13 and *Trichosanthes Kirilowii Maximowicz*. Preclinical studies have shown that SH003 has

14  
15 therapeutic anticancer effects. The aim of this study is to determine the maximum tolerated

16  
17 dose of SH003 in patients with solid cancers.

18  
19  
20  
21 **Methods and analysis**

22 This study is an open-label, dose-escalation trial evaluating the safety and tolerability of

23  
24 SH003. The traditional 3+3 dose-escalation design will be implemented. Patients with solid

25  
26 cancers will be recruited. According to dose level, the patients will receive 1 to 3 tablets of

27  
28 SH003, 3 times-a-day for 3 weeks. Toxicity will be evaluated using common terminology

29  
30 criteria for adverse events (CTCAE). Dose-limiting toxicities are defined as Grade 3 or

31  
32 higher adverse events based on CTCAE. The maximum tolerated dose will be determined by

33  
34 the highest dose at which no more than 1 of 6 patients experiences dose-limiting toxicity.

35  
36  
37  
38 **Ethics and dissemination**

39 This study has been approved by the institutional review board of the Ajou University

40  
41 Hospital (reference AJIRB-MED-CT1-16-311). The results of this study will be disseminated

42  
43 through a scientific journal and a conference.

44  
45  
46  
47 **Trial registrations**

48 ClinicalTrials.gov NCT03081819

## Strengths and limitations of this study

- This is the first human study to examine the safety and feasibility of administering SH003 to treat patients with solid cancers.
- The present study is the first Phase I study to determine the maximum tolerated dose of an herbal medicine in Korea.
- Limitations of this study are that pharmacokinetic and pharmacodynamic studies could not be conducted due to the nature of the drug.

## INTRODUCTION

Cancer, which is caused by an uncontrolled division of abnormal cells in a part of the body, is a leading cause of death globally, accounting for 8.8 million deaths in 2015.<sup>1</sup> Moreover, the economic cost of cancer is increasing. In 2010, the total economic cost of cancer was calculated at approximately 1.16 trillion US dollars.<sup>2</sup> In Korea, there were 1.46 million patients with cancer, and 9.57% of people aged 65 and older were patients with cancer.<sup>3</sup> The Korea National Health Insurance Service reported that the socioeconomic cost of cancer was more than 12.1 billion US dollars in 2012, which accounted for 43.2% of the socioeconomic costs of the five major causes of death.<sup>4</sup>

Although many investigations and development of several anticancer drugs have been conducted, the global market for cancer treatment is continuing to grow due to unmet needs. Therefore, many herbal medicines have received attention as potential new anticancer drugs. SH003 is a mixed herbal extract containing Huang-Qi (*Astragalus membranaceus*), Dang-Gui (*Angelica gigas*), and Gua-Lou-Gen (*Trichosanthes Kirilowii Maximowicz*), which are traditionally used in Korean medicine. Huang-Qi has been reported to be effective in cancer treatment in many previous studies.<sup>5</sup> Dang-Gui enhances chemosensitivity in ovarian cancer cells by inhibition of P-glycoprotein expression.<sup>6</sup> Gua-Lou-Gen has shown anti-tumour activity in cancer cells.<sup>7</sup> According to the theoretical framework of Korean medicine, Huang-

1  
2  
3  
4 Qi has the effect of tonifying qi, Dang-Gui has the function of tonifying blood, and Gua-Lou-  
5  
6 Gen has the effects of disperse swelling and expel pus.<sup>8</sup> Therefore, the combination of those  
7  
8 herbs is expected to be effective in the treatment of cancer patients.

9  
10 It has been reported that SH003 suppresses breast cancer growth and metastasis by inducing  
11  
12 autophagy<sup>9</sup> and inhibiting STAT3-IL-6 signaling.<sup>10</sup> SH003 inhibits cell proliferation and  
13  
14 induces apoptosis without an effect on normal cell viability.<sup>10</sup> Moreover, it represses tumour  
15  
16 angiogenesis by inhibiting VEGF-induced VEGFR2 activation.<sup>11</sup> VEGF-induced  
17  
18 phosphorylation of VEGFR2 is blocked by SH003 interrupting VEGF binding to VEGFR2.  
19  
20 SH003 induces apoptosis of prostate cancer cells in a dose-dependent manner.<sup>12</sup> This is due  
21  
22 to the intracellular mechanisms that SH003 inhibits ERK2-mediated signalling. *In vivo*  
23  
24 xenograft studies have reported that SH003 inhibits tumour growth and metastasis,<sup>10</sup> as well as  
25  
26 VEGF-induced tumour angiogenesis<sup>11</sup> without detectable toxicity, and SH003 in combination with  
27  
28 doxorubicin has shown a synergistic effect in treating triple-negative breast cancer (TNBC).<sup>13</sup> The  
29  
30 combinational treatment induces apoptotic cell death and suppresses tumour growth. Moreover, no  
31  
32 toxicity was detected in the efficacy studies. In one toxicity test, hypertrophy of the liver was  
33  
34 observed; however, it was deemed to be a reversible change with no toxicological  
35  
36 significance.<sup>9</sup> However, an herbology textbook has mentioned that components of SH003  
37  
38 should be used with caution in patients with diarrhoea.<sup>8</sup>  
39  
40  
41  
42 SH003 has never been tested in humans before; therefore, we have designed a Phase I dose-  
43  
44 escalation study to evaluate the maximum tolerated dose (MTD) of SH003 in patients with  
45  
46 solid cancers.  
47  
48  
49  
50

## 51 **METHODS**

### 52 **Study design**

1  
2  
3  
4 A Phase I dose-escalation study will be conducted at the Ajou University Hospital in Suwon,  
5 Republic of Korea. Any participants fulfilling the eligibility criteria will be enrolled. The  
6 enrolled participants will be assigned to one of three groups receiving 1200 mg, 2400 mg,  
7 and 4800 mg doses of SH003 per day. These doses represent the measurement of active  
8 ingredients found in a half of one tablet. The dose escalation will follow the modified  
9  
10  
11  
12  
13  
14  
15  
16  
17  
18  
19  
20  
21  
22  
23  
24  
25  
26  
27  
28  
29  
30  
31  
32  
33  
34  
35  
36  
37  
38  
39  
40  
41  
42  
43  
44  
45  
46  
47  
48  
49  
50  
51  
52  
53  
54  
55  
56  
57  
58  
59  
60

A Phase I dose-escalation study will be conducted at the Ajou University Hospital in Suwon, Republic of Korea. Any participants fulfilling the eligibility criteria will be enrolled. The enrolled participants will be assigned to one of three groups receiving 1200 mg, 2400 mg, and 4800 mg doses of SH003 per day. These doses represent the measurement of active ingredients found in a half of one tablet. The dose escalation will follow the modified Fibonacci sequence. The dose will be increased twice by 100% of the preceding dose. Each participant will be examined for signs and symptoms of any adverse events (AEs) during the study period. Figure 1 shows the schematic flow of the present study. Protocol amendments are not expected; however if they are essential, any changes in the study protocol will be provided to the all investigators via a conference. All modifications will be included in the final manuscript. The present study was begun in March 2017 and is currently in progress.

## Recruitment

Subjects will be recruited as follows. Patients who visit the trial site and meet the inclusion criteria will be recommended to participate in the trial by the physician in charge of the study. Detailed information on the trial, including the study period, purpose of the study, inclusion and exclusion criteria, and interventions, will be provided by the investigators.

## Participants

### *Inclusion criteria*

Participants meeting the following criteria will be included: those 19 years-of-age and older; patients with histologically or cytologically confirmed solid cancers; metastatic or unresectable cancers for which standard curative measures do not exist or are no longer effective; those with ECOG Performance Status  $\leq 2$ ; life expectancy estimated to be at least 12 weeks; those who have not received chemotherapy or surgery within the last 4 weeks;

1  
2  
3  
4 those with recovery to haemoglobin  $\geq 8$  g/dL, platelets  $\geq 75,000/\mu\text{L}$ , and absolute neutrophil  
5  
6  
7 count  $\geq 1,500/\mu\text{L}$ ; those patients with the ability to swallow tablets, as well as those with the  
8  
9  
10 ability to understand the study and who are willing to sign a written informed consent  
11  
12 document.  
13  
14  
15

### 16 17 **Exclusion criteria**

18 Patients with the following will be excluded: those with known hypersensitivity to any study  
19 drug component, including *Astragalus membranaceus*, *Angelica gigas*, and *Trichosanthes*  
20 *Kirilowii Maximowicz*; patients with acute or chronic infections requiring treatment (active  
21 hepatitis A, B, and C viruses, human immunodeficiency virus, tuberculosis); estimated  
22 glomerular filtration rate (eGFR)  $< 60\text{ml/min}$ , aspartate aminotransferase (AST), alanine  
23 aminotransferase (ALT), or total bilirubin  $\geq 2.5$  times the institutional upper limit of normal  
24 (ULN); patients with uncontrolled cardiovascular diseases (unstable angina, heart failure,  
25 myocardial infarction, hypertension that remains uncontrolled: 140/90 mm Hg or higher);  
26 patients with active cytomegalovirus infection within the past 4 weeks; patients who have  
27 experienced major surgery on cerebrovascular disease such as acute coronary syndrome,  
28 stroke, etc., within the past year; pregnant or lactating females and women with childbearing  
29 potential; patients who do not agree to either use effective means of contraception or not to  
30 donate sperm during the trial and up to 1 month after final administration; patients who are  
31 taking anticoagulants or anticonvulsants; those with any psychological, sociological, or  
32 geographical conditions that could potentially interfere with their compliance to the study  
33 protocol, and, finally, patients who have participated in other clinical trials of medicine or  
34 medical devices within the past month.  
35  
36  
37  
38  
39  
40  
41  
42  
43  
44  
45  
46  
47  
48  
49  
50  
51  
52  
53  
54

### **Subject withdrawal criteria**

The participants who meet the following criteria will be discontinued from the study: those who receive other treatments for anti-cancer purposes; participants who withdraw their consent; those who experience serious AEs related to the investigational drug; those with significant protocol violations during the trial, including detection of eligibility violations; those patients who the investigator decides to terminate for their health. The participant who has been withdrawn regardless of the investigational product will be replaced by a new participant.

### **Sample size**

The present study is a dose-escalation study that examines the MTD of SH003 for patients with solid cancers. The, dose-escalation rules for the traditional 3 + 3 design will be adopted.<sup>14</sup> Three patients will be initially enrolled into a starting dose cohort. If there is no dose-limiting toxicity (DLT) observed in any of these participants, the study will proceed to enrol additional participants into the next higher dose cohort. If one participant develops a DLT at a specific dose, an additional three participants will be enrolled into the same dose cohort. Development of DLTs in more than 1 of 6 participants at a specific dose will suggest that the MTD has been exceeded, and further dose escalation will be stopped. The present study plans to escalate the dose of SH003 up to three times. Thus, at least 3, and up to 18 participants, will be recruited for the study. Three to six participants will be allocated to each dose of SH003.

### **Allocation**

The study participants who satisfy the eligibility criteria will be assigned to each cohort in the order they are recruited. After one cohort has been recruited, the participant enrolment will be



1  
2  
3  
4 suspended until the end of the study for that cohort to determine whether DLT has occurred.

5  
6 The recruitment and dose of the following cohort will depend on the outcome of the previous  
7  
8 one.  
9

### 10 11 12 13 14 **Treatment protocol**

15  
16 The participants will receive SH003 for three weeks. They will orally take 1 to 3 tablets with  
17  
18 water three times a day after meals for 3 weeks according to their dose level. It should be  
19  
20 noted that no abnormal findings related to the investigational product were observed in either  
21  
22 the single-dose toxicity study or the repeated-dose toxicity study. Therefore, the no observed  
23  
24 adverse effect level (NOAEL) of the investigational product was determined to be 2500  
25  
26 mg/kg for rats. According to the FDA guideline, the maximum recommended starting dose  
27  
28 for adults is 2400 mg per day based on a safety factor of 10.<sup>15</sup> Based on the toxicity and  
29  
30 efficacy study results, the starting dose was determined to be 1200 mg per day for this  
31  
32 study.<sup>10</sup> The participants will be required to return unused investigational products for  
33  
34 calculating their compliance. During the study, the participants will be prohibited from  
35  
36 receiving other treatments for cancer, including chemotherapy and radiotherapy.  
37  
38  
39  
40  
41  
42

### 43 **Interventions**

44  
45 The pharmaceutical company Hanpoong Pharm and Foods Co. Ltd. (Jeonju, Republic of  
46  
47 Korea), produces the SH003 in accordance with Korea Good Manufacturing Practice (KGMP)  
48  
49 standards. The SH003 used in the present study is a pale yellow-to-brown rectangular tablet.  
50  
51 One tablet (total of 800 mg) includes 400mg of solid extracts from *Astragalus membranaceus*  
52  
53 · *Angelica gigas* · *Trichosanthes Kirilowii Maximowicz* (1:1:1) 30% ethanol extract.  
54  
55  
56  
57  
58  
59  
60

**Primary outcome measurement**

The primary outcome in the present study will be determined by the number of 3 or 4 AEs throughout the study period as measured by the National Cancer Institute (NCI; Bethesda, MD USA) common terminology criteria for adverse events (CTCAE) v4.03.<sup>16</sup> CTCAE is a collection of AEs that commonly occur in oncology. Each AE listed has a grading scale indicating its severity. The AEs for this study will be measured by a trained investigator at every patient visit, in accordance with standard operating procedures (SOPs). The expected dose-limiting toxicities include diarrhoea, increases in ALT, and/or AST, febrile neutropenia, and a decreased platelet count.

**Secondary outcome measurement**

Secondary outcome measurements include the AEs, regardless of grade, throughout the study period as measured by the NCI CTCAE v4.03 as well as changes in tumour size as assessed by computed tomography (CT) imaging. The study schedule is detailed in Table 1.

**Table 1 - Study schedule of SH003 Phase I study (4 weeks)**

| TIMEPOINT                    | STUDY PERIOD |                                                                                    |       |        |           |
|------------------------------|--------------|------------------------------------------------------------------------------------|-------|--------|-----------|
|                              | Enrolment    | Treatment Period                                                                   |       |        | Close-out |
|                              | Day -7       | Day 0                                                                              | Day 8 | Day 22 | Day 29    |
| Eligibility screen           | X            |                                                                                    |       |        |           |
| Informed consent             | X            |                                                                                    |       |        |           |
| Allocation                   |              | X                                                                                  |       |        |           |
| SH003                        |              |  |       |        |           |
| Demographic characteristic   | X            |                                                                                    |       |        |           |
| Physical examination         | X            | X                                                                                  | X     | X      | X         |
| Vital signs                  | X            | X                                                                                  | X     | X      | X         |
| Laboratory test              | X            |                                                                                    | X     | X      | X         |
| Electrocardiography          | X            |                                                                                    |       | X      |           |
| Pregnancy test               | X            |                                                                                    |       |        |           |
| Medical/drug use history     | X            |                                                                                    |       |        |           |
| Smoking and drinking history | X            |                                                                                    |       |        |           |
| Computed tomography          | X            |                                                                                    |       |        | X         |
| Compliance calculation       |              |                                                                                    | X     | X      |           |
| Concomitant medication       | X            | X                                                                                  | X     | X      | X         |
| Adverse event                |              |                                                                                    | X     | X      | X         |

### **Safety outcomes**

All variables related to the safety of participants, including vital signs, physical examination, hematologic, biochemical, and urine tests, and AEs will be documented on the case report form (CRF) at every visit. If an AE is severe and associated with the investigational product, the participant will be withdrawn from the study and appropriate therapy will be provided to them. Any loss caused by the present study will be reimbursed by insurance.

### **Outcomes analysis**

#### *Determination of maximum tolerated dose*

MTD will be defined as the dose just below the lowest dose level at which more than 1 out of 6 patients exhibit DLT during the 4 weeks of the trial period. In the present study, the highest dose among the three dose groups (1200 mg, 2400 mg or 4800 mg per day) with one patient or less experiencing DLT will be determined as the MTD of SH003.

All analyses of data from the present study will be descriptive, as the study includes no inferential analysis and general hypothesis testing. The continuous variables will be displayed as the median and range, and the categorical variables will be displayed as the absolute and relative frequencies. After completion of each cohort's study period, an analysis will be conducted to determine the subsequent dose level.

### **Data and safety monitoring**

To maintain the quality of the present study, monitoring will be conducted by the Contract Research Organization (CRO). The institution participating in the present study will be monitored while this trial is in progress through use of SOPs. For data quality improvement, double data entry and range checks for data values will be performed. Suspected and

1  
2  
3  
4 unexpected serious adverse reactions will be reported to the institutional review board (IRB)  
5  
6 and regulatory authorities in the Republic of Korea within 24 hours.  
7  
8  
9

### 10 **Ethics and dissemination**

11  
12 The present study has been approved by the IRB of the Ajou University Hospital (reference  
13  
14 AJIRB-MED-CT1-16-311). The current protocol version is 1.1. Written informed consent  
15  
16 will be obtained from each participant prior to commencement of the trial procedure by the  
17  
18 investigator. Informed consent for the research use of human biological material will also be  
19  
20 obtained for collection, storage, and use of blood samples from participants. The trial will be  
21  
22 performed in compliance with the Helsinki Declaration and according to Good Clinical  
23  
24 Practice as described by the Korean Ministry of Food and Drug Safety (MFDS).  
25  
26

27 Confidentiality of patients' personal information will be protected. Each participant will be  
28  
29 given a study identification number upon enrolment. During the trial period, data will be dealt  
30  
31 with by using study identification numbers. During and after the study, all records will be  
32  
33 kept in secure locked cabinets or in password-protected computer files. Only participating  
34  
35 investigators will have the authority to access the data. The results of this study will be  
36  
37 disseminated through an academic journal publication or a scientific conference.  
38  
39  
40  
41  
42

### 43 **Patient and public involvement**

44  
45 Patients or public were not involved to design the present study, and will not involve in the  
46  
47 recruitment to and conduct of the study. So far, there is no established plan for announcement  
48  
49 the results of the study to study participants.  
50  
51  
52  
53  
54  
55  
56

## DISCUSSION

The present study will investigate the tolerability and safety of administering SH003 to treat patients with solid cancers. Globally, there were 8.2 million reported deaths from cancer in 2012, and cancer is also the leading cause of mortality in Korea.<sup>17 18</sup> Thus, development of anti-cancer drugs is active in Korea. Among a total of 628 cases of investigational new drug (IND) approvals in 2016, the number of anti-cancer drugs was the highest, at 202 cases.<sup>19</sup> Nevertheless, there have been few IND approvals for new herbal medicines as anti-cancer drugs. In this situation, SH003 received IND approval from the Korean MFDS to begin a Phase I trial testing it as anti-cancer drug.

In addition to the effect of tumour size-reduction, SH003 has shown much potential as an anti-cancer agent in preclinical studies. The combination of SH003 and paclitaxel has been shown to enhance apoptotic cell death in paclitaxel-resistant breast cancer cells by inhibition of multidrug resistance protein 1 (MDR1) expression.<sup>20</sup> Decursin in Dang-Gui, one of the constituent herbs of SH003, has been shown to inhibit doxorubicin-resistant ovarian cancer cell proliferation and induce apoptosis.<sup>6</sup> The combination of SH003 and doxorubicin has shown synergistic effects in TNBC treatment.<sup>13</sup> Those studies suggest that SH003 could be used as an anti-MDR tumour agent and in combination with conventional chemotherapy drugs. SH003 has shown efficacy in treating various cancers, including breast, ovarian, and prostate cancers. Thus, further clinical studies are necessary to evaluate its effectiveness in treating various cancers. The pharmacological action of SH003 has not yet been fully elucidated. Thus, preclinical studies for SH003 will also continue to be conducted and the results will be published.

The present study is particularly significant. First, it is the only Phase I dose-escalation study conducted to date to determine the MTD for a new herbal medicine in Korea. While there have been several studies that investigated the anti-cancer effect of herbal medicine, most of

1  
2  
3  
4 these were preclinical studies or clinical trials to evaluate the effectiveness of established  
5  
6 herbal medicine in treating cancer patients.<sup>21-24</sup> Second, the present study will investigate the  
7  
8 effect of SH003 on changes in tumour size for planning further studies to evaluate its efficacy.

9  
10 Changes in tumour size, that is objective response, are not a common outcome measurement  
11  
12 for phase I study, but have been included in the present study, expecting that the results  
13  
14 would provide helpful information to plan further studies.

15  
16 Limitations of the present study are that the number of dose levels is relatively small and the  
17  
18 study does not include pharmacokinetics (PK) and pharmacodynamics (PD) research. Due to  
19  
20 the nature of the formulation, a dose exceeding 4 tablets would be inconvenient and may  
21  
22 reduce patient compliance, thus the upper limit of dose level was determined as 4800 mg per  
23  
24 day, the third dose level in this study. The effective dose estimated from preclinical studies  
25  
26 was also considered.<sup>10</sup> Most herbal medicines, including SH003, are composed of complex  
27  
28 compounds, and thus, PK and PD studies are not easy.<sup>25</sup> Therefore, it is difficult to collect PK  
29  
30 evidence on dose and frequency of administration of herbal medicines. Based on *in vivo* PK  
31  
32 studies on SH003 currently being performed, further human studies will need to be conducted.

33  
34 Although the present study has a few limitations, it serves as the first in-human trial to  
35  
36 explore the use of SH003 to treat patients with cancer. Moreover, to the best of our  
37  
38 knowledge, this is the first Phase I study of an herbal medicine in Korea. We, therefore,  
39  
40 expect that the present study could promote the overall development of new herbal medicines  
41  
42 to treat cancer and other devastating diseases.  
43  
44  
45  
46  
47  
48  
49  
50  
51  
52  
53  
54  
55  
56  
57  
58  
59  
60

## Authors' affiliations

<sup>1</sup> Department of Korean Preventive Medicine, College of Korean Medicine, Kyung Hee University, 26, Kyunghedae-ro, Dongdaemun-gu, Seoul, Republic of Korea

<sup>2</sup> Department of Cardiovascular and Neurologic disease (Stroke center), College of Korean Medicine, Kyung Hee University, Seoul, Republic of Korea

## Acknowledgements

We wish to acknowledge Hanpoong Phar. & Foods Co. Ltd. for providing investigational product support.

## Contributors

CC, SK and YK have written the first manuscript for this trial and they will contribute to monitoring this trial. MK, BHJ and YCS have edited the first manuscript. SGK has conducted all the procedures for this protocol. All authors have read and approved the final manuscript.

## Funding

This research was supported by a grant of the Korea Health Technology R&D Project through the Korea Health Industry Development Institute (KHIDI), funded by the Ministry of Health & Welfare, Republic of Korea (grant number : HI11C2110). The management, analysis and reporting of study will be conducted independently by the study investigators.

## Competing interests

None declared.



## Patients consent

Obtained

## Ethics approval

The Institutional Review Board of the Ajou University Hospital approved the study

(reference AJIRB-MED-CT1-16-311).

## Provenance and peer review

Not commissioned; externally peer reviewed.

## References

1. World Health Organization. Cancer, fact sheet. Updated February 2017. World Health Organization, 2017.
2. World Health Organization. World cancer report 2014. Lyon: International Agency for Research on Cancer, 2014.
3. National Cancer Center. National Cancer Information Center 2017. <http://www.cancer.go.kr> (accessed July 2017)
4. Hyun KR, Lee SM. Analysis of Socioeconomic Costs of Five Major Diseases. *Health insurance & policy* 2014;13(2):91-107.
5. Auyeung KK, Han QB, Ko JK. Astragalus membranaceus: A Review of its Protection Against Inflammation and Gastrointestinal Cancers. *Am J Chin Med* 2016;44(1):1-22.
6. Choi HS, Cho SG, Kim MK, et al. Decursin in Angelica gigas Nakai (AGN) Enhances Doxorubicin Chemosensitivity in NCI/ADR-RES Ovarian Cancer Cells via Inhibition of P-glycoprotein Expression. *Phytother Res* 2016;30(12):2020-26.
7. Li J, Li H, Zhang Z, et al. The anti-cancerous activity of recombinant trichosanthin on prostate cancer cell PC3. *Biol Res* 2016;49:21.
8. National College of Korean Medicine Publication Committee on Joint Textbook. *Herbology*. Seoul, Korea: Younglimsa 2016.
9. Choi YK, Cho SG, Choi YJ, et al. SH003 suppresses breast cancer growth by accumulating p62 in autolysosomes. *Oncotarget* 2016;8(51):88386-88400.
10. Choi YK, Cho SG, Woo SM, et al. Herbal extract SH003 suppresses tumor growth and metastasis of MDA-MB-231 breast cancer cells by inhibiting STAT3-IL-6 signaling. *Mediators Inflamm* 2014;2014:492173.
11. Choi HS, Kim MK, Lee K, et al. SH003 represses tumor angiogenesis by blocking VEGF binding to VEGFR2. *Oncotarget* 2016;7(22):32969-79.

12. Choi YJ, Choi YK, Lee KM, et al. SH003 induces apoptosis of DU145 prostate cancer cells by inhibiting ERK-involved pathway. *BMC Complement Altern Med* 2016;16(1):507.
13. Woo SM, Kim AJ, Choi YK, et al. Synergistic Effect of SH003 and Doxorubicin in Triple-negative Breast Cancer. *Phytother Res* 2016;30(11):1817-23.
14. Storer BE. An evaluation of phase I clinical trial designs in the continuous dose-response setting. *Stat Med* 2001;20(16):2399-408.
15. U.S. Dept. of Health and Human Services, Food and Drug Administration, Center for Drug Evaluation and Research. Guidance for industry estimating the maximum safe starting dose in initial clinical trials for therapeutics in adult healthy volunteers. Rockville, MD. USA: Food and Drug Administration, 2005.
16. U.S. Department of Health and Human Services. Common Terminology Criteria for Adverse Events (CTCAE) v4.03: National Institutes of Health National Cancer Institute, 2010.
17. International Agency for Research on Cancer. GLOBOCAN 2012: Estimated Cancer Incidence, Mortality and Prevalence Worldwide in 2012. World Health Organization, 2012. [http://globocan.iarc.fr/Pages/fact\\_sheets\\_cancer.aspx](http://globocan.iarc.fr/Pages/fact_sheets_cancer.aspx)
18. National Cancer Center. Cancer Facts & Figures 2014. Ministry of Health & Welfare, 2014.
19. Ministry of Food and Drug Safety. MFDS, Results of the Investigational New Drug approval status 2016. Ministry of Food and Drug Safety, 2017.
20. Choi HS, Cho SG, Kim MK, et al. SH003 enhances paclitaxel chemosensitivity in MCF-7/PAX breast cancer cells through inhibition of MDR1 activity. *Mol Cell Biochem* 2017;426(1-2):1-8.
21. Kim HY, Kim J, Ha Thi HT, et al. Evaluation of anti-tumorigenic activity of BP3B against colon cancer with patient-derived tumor xenograft model. *BMC Complement Altern Med* 2016;16(1):473.
22. Choi BY, Joo JC, Lee YK, et al. Anti-cancer effect of *Scutellaria baicalensis* in combination with cisplatin in human ovarian cancer cell. *BMC Complement Altern Med* 2017;17(1):277.
23. Lee SI, Bae JA, Ko YS, et al. Geijigajakyak decoction inhibits the motility and tumorigenesis of colorectal cancer cells. *BMC Complement Altern Med* 2016;16(1):288.
24. Jeong JS, Ryu BH, Kim JS, et al. Bojungikki-tang for cancer-related fatigue: a pilot randomized clinical trial. *Integr Cancer Ther* 2010;9(4):331-8.
25. Liu WJH. Traditional Herbal Medicine Research Methods: Identification, Analysis, Bioassay, and Pharmaceutical and Clinical Studies: Wiley 2011.

## List of Figure

Figure 1. Study flow chart



Study flow chart. SH003



1  
2  
3  
4  
5  
6  
7  
8  
9  
10  
11  
12  
13  
14  
15  
16  
17  
18  
19  
20  
21  
22  
23  
24  
25  
26  
27  
28  
29  
30  
31  
32  
33  
34  
35  
36  
37  
38  
39  
40  
41  
42  
43  
44  
45  
46  
47

SPIRIT 2013 Checklist: Recommended items to address in a clinical trial protocol and related documents\*

| Section/item                      | Item No | Description                                                                                                                                                                                                                                                                              | Addressed on page number |
|-----------------------------------|---------|------------------------------------------------------------------------------------------------------------------------------------------------------------------------------------------------------------------------------------------------------------------------------------------|--------------------------|
| <b>Administrative information</b> |         |                                                                                                                                                                                                                                                                                          |                          |
| Title                             | 1       | Descriptive title identifying the study design, population, interventions, and, if applicable, trial acronym                                                                                                                                                                             | _____1_____              |
| Trial registration                | 2a      | Trial identifier and registry name. If not yet registered, name of intended registry                                                                                                                                                                                                     | _____2_____              |
|                                   | 2b      | All items from the World Health Organization Trial Registration Data Set                                                                                                                                                                                                                 | ___Appendix___           |
| Protocol version                  | 3       | Date and version identifier                                                                                                                                                                                                                                                              | _____11_____             |
| Funding                           | 4       | Sources and types of financial, material, and other support                                                                                                                                                                                                                              | _____13_____             |
| Roles and responsibilities        | 5a      | Names, affiliations, and roles of protocol contributors                                                                                                                                                                                                                                  | _____13_____             |
|                                   | 5b      | Name and contact information for the trial sponsor                                                                                                                                                                                                                                       | _____13_____             |
|                                   | 5c      | Role of study sponsor and funders, if any, in study design; collection, management, analysis, and interpretation of data; writing of the report; and the decision to submit the report for publication, including whether they will have ultimate authority over any of these activities | _____13_____             |
|                                   | 5d      | Composition, roles, and responsibilities of the coordinating centre, steering committee, endpoint adjudication committee, data management team, and other individuals or groups overseeing the trial, if applicable (see Item 21a for data monitoring committee)                         | _____NA_____             |

## Introduction

|                          |    |                                                                                                                                                                                                           |     |
|--------------------------|----|-----------------------------------------------------------------------------------------------------------------------------------------------------------------------------------------------------------|-----|
| Background and rationale | 6a | Description of research question and justification for undertaking the trial, including summary of relevant studies (published and unpublished) examining benefits and harms for each intervention        | 3-4 |
|                          | 6b | Explanation for choice of comparators                                                                                                                                                                     | NA  |
| Objectives               | 7  | Specific objectives or hypotheses                                                                                                                                                                         | 4   |
| Trial design             | 8  | Description of trial design including type of trial (eg, parallel group, crossover, factorial, single group), allocation ratio, and framework (eg, superiority, equivalence, noninferiority, exploratory) | 4   |

## Methods: Participants, interventions, and outcomes

|                      |     |                                                                                                                                                                                                                                                                                                                                                                                |     |
|----------------------|-----|--------------------------------------------------------------------------------------------------------------------------------------------------------------------------------------------------------------------------------------------------------------------------------------------------------------------------------------------------------------------------------|-----|
| Study setting        | 9   | Description of study settings (eg, community clinic, academic hospital) and list of countries where data will be collected. Reference to where list of study sites can be obtained                                                                                                                                                                                             | 4   |
| Eligibility criteria | 10  | Inclusion and exclusion criteria for participants. If applicable, eligibility criteria for study centres and individuals who will perform the interventions (eg, surgeons, psychotherapists)                                                                                                                                                                                   | 5-6 |
| Interventions        | 11a | Interventions for each group with sufficient detail to allow replication, including how and when they will be administered                                                                                                                                                                                                                                                     | 7   |
|                      | 11b | Criteria for discontinuing or modifying allocated interventions for a given trial participant (eg, drug dose change in response to harms, participant request, or improving/worsening disease)                                                                                                                                                                                 | 6   |
|                      | 11c | Strategies to improve adherence to intervention protocols, and any procedures for monitoring adherence (eg, drug tablet return, laboratory tests)                                                                                                                                                                                                                              | 7   |
|                      | 11d | Relevant concomitant care and interventions that are permitted or prohibited during the trial                                                                                                                                                                                                                                                                                  | 7   |
| Outcomes             | 12  | Primary, secondary, and other outcomes, including the specific measurement variable (eg, systolic blood pressure), analysis metric (eg, change from baseline, final value, time to event), method of aggregation (eg, median, proportion), and time point for each outcome. Explanation of the clinical relevance of chosen efficacy and harm outcomes is strongly recommended | 8   |
| Participant timeline | 13  | Time schedule of enrolment, interventions (including any run-ins and washouts), assessments, and visits for participants. A schematic diagram is highly recommended (see Figure)                                                                                                                                                                                               | 9   |

1  
2  
3 Sample size 14 Estimated number of participants needed to achieve study objectives and how it was determined, including \_\_\_\_\_6\_\_\_\_\_  
4 clinical and statistical assumptions supporting any sample size calculations

5  
6 Recruitment 15 Strategies for achieving adequate participant enrolment to reach target sample size \_\_\_\_\_5\_\_\_\_\_  
7

8 **Methods: Assignment of interventions (for controlled trials)**  
9

10 Allocation:

11 Sequence generation 16a Method of generating the allocation sequence (eg, computer-generated random numbers), and list of any \_\_\_\_\_NA\_\_\_\_\_  
12 factors for stratification. To reduce predictability of a random sequence, details of any planned restriction  
13 (eg, blocking) should be provided in a separate document that is unavailable to those who enrol participants  
14 or assign interventions  
15

16  
17 Allocation concealment mechanism 16b Mechanism of implementing the allocation sequence (eg, central telephone; sequentially numbered, \_\_\_\_\_NA\_\_\_\_\_  
18 opaque, sealed envelopes), describing any steps to conceal the sequence until interventions are assigned  
19

20  
21 Implementation 16c Who will generate the allocation sequence, who will enrol participants, and who will assign participants to \_\_\_\_\_NA\_\_\_\_\_  
22 interventions  
23

24 Blinding (masking) 17a Who will be blinded after assignment to interventions (eg, trial participants, care providers, outcome \_\_\_\_\_NA\_\_\_\_\_  
25 assessors, data analysts), and how  
26

27 17b If blinded, circumstances under which unblinding is permissible, and procedure for revealing a participant's \_\_\_\_\_NA\_\_\_\_\_  
28 allocated intervention during the trial  
29

30  
31 **Methods: Data collection, management, and analysis**  
32

33 Data collection methods 18a Plans for assessment and collection of outcome, baseline, and other trial data, including any related \_\_\_\_\_8\_\_\_\_\_  
34 processes to promote data quality (eg, duplicate measurements, training of assessors) and a description of  
35 study instruments (eg, questionnaires, laboratory tests) along with their reliability and validity, if known.  
36 Reference to where data collection forms can be found, if not in the protocol  
37

38 18b Plans to promote participant retention and complete follow-up, including list of any outcome data to be \_\_\_\_\_6\_\_\_\_\_  
39 collected for participants who discontinue or deviate from intervention protocols  
40  
41  
42  
43  
44

|    |                                 |     |                                                                                                                                                                                                                                                                                                                                       |              |
|----|---------------------------------|-----|---------------------------------------------------------------------------------------------------------------------------------------------------------------------------------------------------------------------------------------------------------------------------------------------------------------------------------------|--------------|
| 1  |                                 |     |                                                                                                                                                                                                                                                                                                                                       |              |
| 2  |                                 |     |                                                                                                                                                                                                                                                                                                                                       |              |
| 3  | Data management                 | 19  | Plans for data entry, coding, security, and storage, including any related processes to promote data quality (eg, double data entry; range checks for data values). Reference to where details of data management procedures can be found, if not in the protocol                                                                     | _____10_____ |
| 4  |                                 |     |                                                                                                                                                                                                                                                                                                                                       |              |
| 5  |                                 |     |                                                                                                                                                                                                                                                                                                                                       |              |
| 6  |                                 |     |                                                                                                                                                                                                                                                                                                                                       |              |
| 7  | Statistical methods             | 20a | Statistical methods for analysing primary and secondary outcomes. Reference to where other details of the statistical analysis plan can be found, if not in the protocol                                                                                                                                                              | _____10_____ |
| 8  |                                 |     |                                                                                                                                                                                                                                                                                                                                       |              |
| 9  |                                 |     |                                                                                                                                                                                                                                                                                                                                       |              |
| 10 |                                 | 20b | Methods for any additional analyses (eg, subgroup and adjusted analyses)                                                                                                                                                                                                                                                              | _____10_____ |
| 11 |                                 |     |                                                                                                                                                                                                                                                                                                                                       |              |
| 12 |                                 | 20c | Definition of analysis population relating to protocol non-adherence (eg, as randomised analysis), and any statistical methods to handle missing data (eg, multiple imputation)                                                                                                                                                       | _____6_____  |
| 13 |                                 |     |                                                                                                                                                                                                                                                                                                                                       |              |
| 14 |                                 |     |                                                                                                                                                                                                                                                                                                                                       |              |
| 15 | <b>Methods: Monitoring</b>      |     |                                                                                                                                                                                                                                                                                                                                       |              |
| 16 |                                 |     |                                                                                                                                                                                                                                                                                                                                       |              |
| 17 | Data monitoring                 | 21a | Composition of data monitoring committee (DMC); summary of its role and reporting structure; statement of whether it is independent from the sponsor and competing interests; and reference to where further details about its charter can be found, if not in the protocol. Alternatively, an explanation of why a DMC is not needed | _____10_____ |
| 18 |                                 |     |                                                                                                                                                                                                                                                                                                                                       |              |
| 19 |                                 |     |                                                                                                                                                                                                                                                                                                                                       |              |
| 20 |                                 |     |                                                                                                                                                                                                                                                                                                                                       |              |
| 21 |                                 |     |                                                                                                                                                                                                                                                                                                                                       |              |
| 22 |                                 | 21b | Description of any interim analyses and stopping guidelines, including who will have access to these interim results and make the final decision to terminate the trial                                                                                                                                                               | _____10_____ |
| 23 |                                 |     |                                                                                                                                                                                                                                                                                                                                       |              |
| 24 |                                 |     |                                                                                                                                                                                                                                                                                                                                       |              |
| 25 | Harms                           | 22  | Plans for collecting, assessing, reporting, and managing solicited and spontaneously reported adverse events and other unintended effects of trial interventions or trial conduct                                                                                                                                                     | _____10_____ |
| 26 |                                 |     |                                                                                                                                                                                                                                                                                                                                       |              |
| 27 |                                 |     |                                                                                                                                                                                                                                                                                                                                       |              |
| 28 | Auditing                        | 23  | Frequency and procedures for auditing trial conduct, if any, and whether the process will be independent from investigators and the sponsor                                                                                                                                                                                           | _____NA_____ |
| 29 |                                 |     |                                                                                                                                                                                                                                                                                                                                       |              |
| 30 |                                 |     |                                                                                                                                                                                                                                                                                                                                       |              |
| 31 |                                 |     |                                                                                                                                                                                                                                                                                                                                       |              |
| 32 | <b>Ethics and dissemination</b> |     |                                                                                                                                                                                                                                                                                                                                       |              |
| 33 |                                 |     |                                                                                                                                                                                                                                                                                                                                       |              |
| 34 | Research ethics approval        | 24  | Plans for seeking research ethics committee/institutional review board (REC/IRB) approval                                                                                                                                                                                                                                             | _____11_____ |
| 35 |                                 |     |                                                                                                                                                                                                                                                                                                                                       |              |
| 36 |                                 |     |                                                                                                                                                                                                                                                                                                                                       |              |
| 37 | Protocol amendments             | 25  | Plans for communicating important protocol modifications (eg, changes to eligibility criteria, outcomes, analyses) to relevant parties (eg, investigators, REC/IRBs, trial participants, trial registries, journals, regulators)                                                                                                      | _____4_____  |
| 38 |                                 |     |                                                                                                                                                                                                                                                                                                                                       |              |
| 39 |                                 |     |                                                                                                                                                                                                                                                                                                                                       |              |
| 40 |                                 |     |                                                                                                                                                                                                                                                                                                                                       |              |
| 41 |                                 |     |                                                                                                                                                                                                                                                                                                                                       |              |
| 42 |                                 |     |                                                                                                                                                                                                                                                                                                                                       |              |
| 43 |                                 |     |                                                                                                                                                                                                                                                                                                                                       |              |
| 44 |                                 |     |                                                                                                                                                                                                                                                                                                                                       |              |
| 45 |                                 |     |                                                                                                                                                                                                                                                                                                                                       |              |
| 46 |                                 |     |                                                                                                                                                                                                                                                                                                                                       |              |
| 47 |                                 |     |                                                                                                                                                                                                                                                                                                                                       |              |

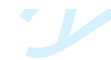

|    |                               |     |                                                                                                                                                                                                                                                                                     |                |
|----|-------------------------------|-----|-------------------------------------------------------------------------------------------------------------------------------------------------------------------------------------------------------------------------------------------------------------------------------------|----------------|
| 1  |                               |     |                                                                                                                                                                                                                                                                                     |                |
| 2  |                               |     |                                                                                                                                                                                                                                                                                     |                |
| 3  | Consent or assent             | 26a | Who will obtain informed consent or assent from potential trial participants or authorised surrogates, and how (see Item 32)                                                                                                                                                        | _____11_____   |
| 4  |                               |     |                                                                                                                                                                                                                                                                                     |                |
| 5  |                               |     |                                                                                                                                                                                                                                                                                     |                |
| 6  |                               | 26b | Additional consent provisions for collection and use of participant data and biological specimens in ancillary studies, if applicable                                                                                                                                               | _____11_____   |
| 7  |                               |     |                                                                                                                                                                                                                                                                                     |                |
| 8  | Confidentiality               | 27  | How personal information about potential and enrolled participants will be collected, shared, and maintained in order to protect confidentiality before, during, and after the trial                                                                                                | _____11_____   |
| 9  |                               |     |                                                                                                                                                                                                                                                                                     |                |
| 10 |                               |     |                                                                                                                                                                                                                                                                                     |                |
| 11 | Declaration of interests      | 28  | Financial and other competing interests for principal investigators for the overall trial and each study site                                                                                                                                                                       | _____14_____   |
| 12 |                               |     |                                                                                                                                                                                                                                                                                     |                |
| 13 |                               |     |                                                                                                                                                                                                                                                                                     |                |
| 14 | Access to data                | 29  | Statement of who will have access to the final trial dataset, and disclosure of contractual agreements that limit such access for investigators                                                                                                                                     | _____11_____   |
| 15 |                               |     |                                                                                                                                                                                                                                                                                     |                |
| 16 |                               |     |                                                                                                                                                                                                                                                                                     |                |
| 17 | Ancillary and post-trial care | 30  | Provisions, if any, for ancillary and post-trial care, and for compensation to those who suffer harm from trial participation                                                                                                                                                       | _____10_____   |
| 18 |                               |     |                                                                                                                                                                                                                                                                                     |                |
| 19 |                               |     |                                                                                                                                                                                                                                                                                     |                |
| 20 | Dissemination policy          | 31a | Plans for investigators and sponsor to communicate trial results to participants, healthcare professionals, the public, and other relevant groups (eg, via publication, reporting in results databases, or other data sharing arrangements), including any publication restrictions | _____11_____   |
| 21 |                               |     |                                                                                                                                                                                                                                                                                     |                |
| 22 |                               |     |                                                                                                                                                                                                                                                                                     |                |
| 23 |                               |     |                                                                                                                                                                                                                                                                                     |                |
| 24 |                               |     |                                                                                                                                                                                                                                                                                     |                |
| 25 |                               | 31b | Authorship eligibility guidelines and any intended use of professional writers                                                                                                                                                                                                      | _____13_____   |
| 26 |                               |     |                                                                                                                                                                                                                                                                                     |                |
| 27 |                               | 31c | Plans, if any, for granting public access to the full protocol, participant-level dataset, and statistical code                                                                                                                                                                     | _____NA_____   |
| 28 |                               |     |                                                                                                                                                                                                                                                                                     |                |
| 29 | <b>Appendices</b>             |     |                                                                                                                                                                                                                                                                                     |                |
| 30 |                               |     |                                                                                                                                                                                                                                                                                     |                |
| 31 | Informed consent materials    | 32  | Model consent form and other related documentation given to participants and authorised surrogates                                                                                                                                                                                  | ___Appendix___ |
| 32 |                               |     |                                                                                                                                                                                                                                                                                     |                |
| 33 |                               |     |                                                                                                                                                                                                                                                                                     |                |
| 34 | Biological specimens          | 33  | Plans for collection, laboratory evaluation, and storage of biological specimens for genetic or molecular analysis in the current trial and for future use in ancillary studies, if applicable                                                                                      | _____NA_____   |
| 35 |                               |     |                                                                                                                                                                                                                                                                                     |                |
| 36 |                               |     |                                                                                                                                                                                                                                                                                     |                |

37 \*It is strongly recommended that this checklist be read in conjunction with the SPIRIT 2013 Explanation & Elaboration for important clarification on the items.  
 38 Amendments to the protocol should be tracked and dated. The SPIRIT checklist is copyrighted by the SPIRIT Group under the Creative Commons  
 39 "[Attribution-NonCommercial-NoDerivs 3.0 Unported](https://creativecommons.org/licenses/by-nc-nd/3.0/)" license.  
 40



# BMJ Open

## A single-arm, open-label, dose-escalation Phase I study to evaluate the safety of an herbal medicine SH003 in patients with solid cancer: a study protocol

|                                 |                                                                                                                                                                                                                                                                                                                                                                                                                                                                                                                                                                                                             |
|---------------------------------|-------------------------------------------------------------------------------------------------------------------------------------------------------------------------------------------------------------------------------------------------------------------------------------------------------------------------------------------------------------------------------------------------------------------------------------------------------------------------------------------------------------------------------------------------------------------------------------------------------------|
| Journal:                        | <i>BMJ Open</i>                                                                                                                                                                                                                                                                                                                                                                                                                                                                                                                                                                                             |
| Manuscript ID                   | bmjopen-2017-019502.R3                                                                                                                                                                                                                                                                                                                                                                                                                                                                                                                                                                                      |
| Article Type:                   | Protocol                                                                                                                                                                                                                                                                                                                                                                                                                                                                                                                                                                                                    |
| Date Submitted by the Author:   | 24-May-2018                                                                                                                                                                                                                                                                                                                                                                                                                                                                                                                                                                                                 |
| Complete List of Authors:       | Cheon, Chunhoo; Kyung Hee University, Department of Korean Preventive Medicine<br>Kang, Sohyeon; Kyung Hee University, Department of Korean Preventive Medicine<br>Ko, Youme; Kyung Hee University, Department of Korean Preventive Medicine<br>Kim, Mia; Kyung Hee University, Department of Cardiovascular and Neurologic disease (Stroke center)<br>Jang, Bo-Hyoung; Kyung Hee University, Department of Korean Preventive Medicine<br>Shin, Yong-Cheol; Kyung Hee University, Department of Korean Preventive Medicine<br>Ko, Seong-Gyu; Kyung Hee University, Department of Korean Preventive Medicine |
| <b>Primary Subject Heading</b>: | Complementary medicine                                                                                                                                                                                                                                                                                                                                                                                                                                                                                                                                                                                      |
| Secondary Subject Heading:      | Oncology                                                                                                                                                                                                                                                                                                                                                                                                                                                                                                                                                                                                    |
| Keywords:                       | Herbal medicine < THERAPEUTICS, ONCOLOGY, COMPLEMENTARY MEDICINE, Clinical trials < THERAPEUTICS                                                                                                                                                                                                                                                                                                                                                                                                                                                                                                            |
|                                 |                                                                                                                                                                                                                                                                                                                                                                                                                                                                                                                                                                                                             |

SCHOLARONE™  
Manuscripts

# A single-arm, open-label, dose-escalation Phase I study to evaluate the safety of an herbal medicine SH003 in patients with solid cancer: a study protocol

Chunhoo Cheon<sup>1</sup>, Sohyeon Kang<sup>1</sup>, Youme Ko<sup>1</sup>, Mia Kim<sup>2</sup>, Bo-Hyoung Jang<sup>1</sup>, Yong-Cheol Shin<sup>1</sup> and Seong-Gyu Ko<sup>1§</sup>

<sup>1</sup> Department of Korean Preventive Medicine, College of Korean Medicine, Kyung Hee University, Seoul, Republic of Korea

<sup>2</sup> Department of Cardiovascular and Neurologic disease (Stroke center), College of Korean Medicine, Kyung Hee University, Seoul, Republic of Korea

§Corresponding author

Email addresses:

CC: hreedom35@gmail.com

SK: kangsohyeon@gmail.com

YMK: ymymko84@gmail.com

BHJ: bhjang@khu.ac.kr

YCS: syc99@khu.ac.kr

SGK: epiko@khu.ac.kr

Correspondence to

Professor Seong-Gyu Ko; epiko@khu.ac.kr, 26, Kyungheedaero, Dongdaemun-gu, Seoul, 02447, Korea Tel. +82-2-961-9278

Word count: 3,064

1  
2  
3  
4 Abstract

5  
6 **Introduction**

7 Cancer is a major health problem worldwide and the leading cause of death in many countries.

8  
9 The number of patients with cancer and socioeconomic costs of cancer continues to increase.

10  
11 SH003 is a novel herbal medicine consisting of *Astragalus membranaceus*, *Angelica gigas*,  
12  
13 and *Trichosanthes Kirilowii Maximowicz*. Preclinical studies have shown that SH003 has  
14  
15 therapeutic anticancer effects. The aim of this study is to determine the maximum tolerated  
16  
17 dose of SH003 in patients with solid cancers.  
18  
19

20  
21 **Methods and analysis**

22 This study is an open-label, dose-escalation trial evaluating the safety and tolerability of  
23  
24 SH003. The traditional 3+3 dose-escalation design will be implemented. Patients with solid  
25  
26 cancers will be recruited. According to dose level, the patients will receive 1 to 4 tablets of  
27  
28 SH003, 3 times-a-day for 3 weeks. Toxicity will be evaluated using common terminology  
29  
30 criteria for adverse events (CTCAE). Dose-limiting toxicities are defined as Grade 3 or  
31  
32 higher adverse events based on CTCAE. The maximum tolerated dose will be determined by  
33  
34 the highest dose at which no more than 1 of 6 patients experiences dose-limiting toxicity.  
35  
36  
37

38  
39 **Ethics and dissemination**

40 This study has been approved by the institutional review board of the Ajou University  
41  
42 Hospital (reference AJIRB-MED-CT1-16-311). The results of this study will be disseminated  
43  
44 through a scientific journal and a conference.  
45  
46

47 **Trial registrations**

48 ClinicalTrials.gov NCT03081819  
49  
50  
51  
52  
53  
54  
55  
56

## Strengths and limitations of this study

- This is the first human study to examine the safety and feasibility of administering SH003 to treat patients with solid cancers.
- The present study is the first Phase I study to determine the maximum tolerated dose of an herbal medicine in Korea.
- Limitations of this study are that pharmacokinetic and pharmacodynamic studies could not be conducted due to the nature of the drug.

## INTRODUCTION

Cancer, which is caused by an uncontrolled division of abnormal cells in a part of the body, is a leading cause of death globally, accounting for 8.8 million deaths in 2015.<sup>1</sup> Moreover, the economic cost of cancer is increasing. In 2010, the total economic cost of cancer was calculated at approximately 1.16 trillion US dollars.<sup>2</sup> In Korea, there were 1.46 million patients with cancer, and 9.57% of people aged 65 and older were patients with cancer.<sup>3</sup> The Korea National Health Insurance Service reported that the socioeconomic cost of cancer was more than 12.1 billion US dollars in 2012, which accounted for 43.2% of the socioeconomic costs of the five major causes of death.<sup>4</sup>

Although many investigations and development of several anticancer drugs have been conducted, the global market for cancer treatment is continuing to grow due to unmet needs. Therefore, many herbal medicines have received attention as potential new anticancer drugs. SH003 is a mixed herbal extract containing Huang-Qi (*Astragalus membranaceus*), Dang-Gui (*Angelica gigas*), and Gua-Lou-Gen (*Trichosanthes Kirilowii Maximowicz*), which are traditionally used in Korean medicine. Huang-Qi has been reported to be effective in cancer treatment in many previous studies.<sup>5</sup> Dang-Gui enhances chemosensitivity in ovarian cancer cells by inhibition of P-glycoprotein expression.<sup>6</sup> Gua-Lou-Gen has shown anti-tumour activity in cancer cells.<sup>7</sup> According to the theoretical framework of Korean medicine, Huang-

1  
2  
3  
4 Qi has the effect of tonifying qi, Dang-Gui has the function of tonifying blood, and Gua-Lou-  
5  
6 Gen has the effects of disperse swelling and expel pus.<sup>8</sup> Therefore, the combination of those  
7  
8 herbs is expected to be effective in the treatment of cancer patients.

9  
10 It has been reported that SH003 suppresses breast cancer growth and metastasis by inducing  
11  
12 autophagy<sup>9</sup> and inhibiting STAT3-IL-6 signaling.<sup>10</sup> SH003 inhibits cell proliferation and  
13  
14 induces apoptosis without an effect on normal cell viability.<sup>10</sup> Moreover, it represses tumour  
15  
16 angiogenesis by inhibiting VEGF-induced VEGFR2 activation.<sup>11</sup> VEGF-induced  
17  
18 phosphorylation of VEGFR2 is blocked by SH003 interrupting VEGF binding to VEGFR2.  
19  
20 SH003 induces apoptosis of prostate cancer cells in a dose-dependent manner.<sup>12</sup> This is due  
21  
22 to the intracellular mechanisms that SH003 inhibits ERK2-mediated signalling. *In vivo*  
23  
24 xenograft studies have reported that SH003 inhibits tumour growth and metastasis,<sup>10</sup> as well as  
25  
26 VEGF-induced tumour angiogenesis<sup>11</sup> without detectable toxicity, and SH003 in combination with  
27  
28 doxorubicin has shown a synergistic effect in treating triple-negative breast cancer (TNBC).<sup>13</sup> The  
29  
30 combinational treatment induces apoptotic cell death and suppresses tumour growth. Moreover, no  
31  
32 toxicity was detected in the efficacy studies. In one toxicity test, hypertrophy of the liver was  
33  
34 observed; however, it was deemed to be a reversible change with no toxicological  
35  
36 significance.<sup>9</sup> However, an herbology textbook has mentioned that components of SH003  
37  
38 should be used with caution in patients with diarrhoea.<sup>8</sup>  
39  
40  
41  
42 SH003 has never been tested in humans before; therefore, we have designed a Phase I dose-  
43  
44 escalation study to evaluate the maximum tolerated dose (MTD) of SH003 in patients with  
45  
46 solid cancers.  
47  
48  
49  
50

## 51 **METHODS**

### 52 **Study design**

1  
2  
3  
4 A Phase I dose-escalation study will be conducted at the Ajou University Hospital in Suwon,  
5  
6 Republic of Korea. Any participants fulfilling the eligibility criteria will be enrolled. The  
7  
8 enrolled participants will be assigned to one of three groups receiving 1200 mg, 2400 mg,  
9  
10 and 4800 mg doses of SH003 per day. These doses represent the measurement of active  
11  
12 ingredients found in a half of one tablet. The dose escalation will follow the modified  
13  
14 Fibonacci sequence. The dose will be increased twice by 100% of the preceding dose. Each  
15  
16 participant will be examined for signs and symptoms of any adverse events (AEs) during the  
17  
18 study period. Figure 1 shows the schematic flow of the present study. Protocol amendments  
19  
20 are not expected; however if they are essential, any changes in the study protocol will be  
21  
22 provided to the all investigators via a conference. All modifications will be included in the  
23  
24 final manuscript. The present study was begun in March 2017 and is currently in progress.  
25  
26  
27  
28  
29

### 30 **Recruitment**

31  
32 Subjects will be recruited as follows. Patients who visit the trial site and meet the inclusion  
33  
34 criteria will be recommended to participate in the trial by the physician in charge of the study.  
35  
36 Detailed information on the trial, including the study period, purpose of the study, inclusion  
37  
38 and exclusion criteria, and interventions, will be provided by the investigators.  
39  
40  
41  
42

### 43 **Participants**

#### 44 *Inclusion criteria*

45  
46  
47 Participants meeting the following criteria will be included: those 19 years-of-age and older;  
48  
49 patients with histologically or cytologically confirmed solid cancers; metastatic or  
50  
51 unresectable cancers for which standard curative measures do not exist or are no longer  
52  
53 effective; those with ECOG Performance Status  $\leq 2$ ; life expectancy estimated to be at least  
54  
55 12 weeks; those who have not received chemotherapy or surgery within the last 4 weeks;

1  
2  
3  
4 those with recovery to haemoglobin  $\geq 8$  g/dL, platelets  $\geq 75,000/\mu\text{L}$ , and absolute neutrophil  
5  
6  
7 count  $\geq 1,500/\mu\text{L}$ ; those patients with the ability to swallow tablets, as well as those with the  
8  
9  
10 ability to understand the study and who are willing to sign a written informed consent  
11  
12 document.  
13  
14  
15

### 16 **Exclusion criteria**

17  
18 Patients with the following will be excluded: those with known hypersensitivity to any study  
19  
20 drug component, including *Astragalus membranaceus*, *Angelica gigas*, and *Trichosanthes*  
21  
22 *Kirilowii Maximowicz*; patients with acute or chronic infections requiring treatment (active  
23  
24 hepatitis A, B, and C viruses, human immunodeficiency virus, tuberculosis); estimated  
25  
26 glomerular filtration rate (eGFR)  $< 60\text{ml/min}$ , aspartate aminotransferase (AST), alanine  
27  
28 aminotransferase (ALT), or total bilirubin  $\geq 2.5$  times the institutional upper limit of normal  
29  
30 (ULN); patients with uncontrolled cardiovascular diseases (unstable angina, heart failure,  
31  
32 myocardial infarction, hypertension that remains uncontrolled: 140/90 mm Hg or higher);  
33  
34 patients with active cytomegalovirus infection within the past 4 weeks; patients who have  
35  
36 experienced major surgery on cerebrovascular disease such as acute coronary syndrome,  
37  
38 stroke, etc., within the past year; pregnant or lactating females and women with childbearing  
39  
40 potential; patients who do not agree to either use effective means of contraception or not to  
41  
42 donate sperm during the trial and up to 1 month after final administration; patients who are  
43  
44 taking anticoagulants or anticonvulsants; those with any psychological, sociological, or  
45  
46 geographical conditions that could potentially interfere with their compliance to the study  
47  
48 protocol, and, finally, patients who have participated in other clinical trials of medicine or  
49  
50 medical devices within the past month.  
51  
52  
53  
54  
55  
56

### **Subject withdrawal criteria**

The participants who meet the following criteria will be discontinued from the study: those who receive other treatments for anti-cancer purposes; participants who withdraw their consent; those who experience serious AEs related to the investigational drug; those with significant protocol violations during the trial, including detection of eligibility violations; those patients who the investigator decides to terminate for their health. The participant who has been withdrawn regardless of the investigational product will be replaced by a new participant.

### **Sample size**

The present study is a dose-escalation study that examines the MTD of SH003 for patients with solid cancers. The, dose-escalation rules for the traditional 3 + 3 design will be adopted.<sup>14</sup> Three patients will be initially enrolled into a starting dose cohort. If there is no dose-limiting toxicity (DLT) observed in any of these participants, the study will proceed to enrol additional participants into the next higher dose cohort. If one participant develops a DLT at a specific dose, an additional three participants will be enrolled into the same dose cohort. Development of DLTs in more than 1 of 6 participants at a specific dose will suggest that the MTD has been exceeded, and further dose escalation will be stopped. The present study plans to escalate the dose of SH003 up to three times. Thus, at least 3, and up to 18 participants, will be recruited for the study. Three to six participants will be allocated to each dose of SH003.

### **Allocation**

The study participants who satisfy the eligibility criteria will be assigned to each cohort in the order they are recruited. After one cohort has been recruited, the participant enrolment will be



1  
2  
3  
4 suspended until the end of the study for that cohort to determine whether DLT has occurred.

5  
6 The recruitment and dose of the following cohort will depend on the outcome of the previous  
7  
8 one.  
9

### 10 11 12 13 14 **Treatment protocol**

15  
16 The participants will receive SH003 for three weeks. They will orally take 1 to 4 tablets with  
17  
18 water three times a day after meals for 3 weeks according to their dose level. It should be  
19  
20 noted that no abnormal findings related to the investigational product were observed in either  
21  
22 the single-dose toxicity study or the repeated-dose toxicity study. Therefore, the no observed  
23  
24 adverse effect level (NOAEL) of the investigational product was determined to be 2500  
25  
26 mg/kg for rats. According to the FDA guideline, the maximum recommended starting dose  
27  
28 for adults is 2400 mg per day based on a safety factor of 10.<sup>15</sup> Based on the toxicity and  
29  
30 efficacy study results, the starting dose was determined to be 1200 mg per day for this  
31  
32 study.<sup>10</sup> The participants will be required to return unused investigational products for  
33  
34 calculating their compliance. During the study, the participants will be prohibited from  
35  
36 receiving other treatments for cancer, including chemotherapy and radiotherapy.  
37  
38  
39  
40  
41  
42

### 43 **Interventions**

44  
45 The pharmaceutical company Hanpoong Pharm and Foods Co. Ltd. (Jeonju, Republic of  
46  
47 Korea), produces the SH003 in accordance with Korea Good Manufacturing Practice (KGMP)  
48  
49 standards. The SH003 used in the present study is a pale yellow-to-brown rectangular tablet.  
50  
51 One tablet (total of 800 mg) includes 400mg of solid extracts from *Astragalus membranaceus*  
52  
53 · *Angelica gigas* · *Trichosanthes Kirilowii Maximowicz* (1:1:1) 30% ethanol extract.  
54  
55  
56  
57  
58  
59  
60

**Primary outcome measurement**

The primary outcome in the present study will be determined by the number of 3 or 4 AEs throughout the study period as measured by the National Cancer Institute (NCI; Bethesda, MD USA) common terminology criteria for adverse events (CTCAE) v4.03.<sup>16</sup> CTCAE is a collection of AEs that commonly occur in oncology. Each AE listed has a grading scale indicating its severity. The AEs for this study will be measured by a trained investigator at every patient visit, in accordance with standard operating procedures (SOPs). The expected dose-limiting toxicities include diarrhoea, increases in ALT, and/or AST, febrile neutropenia, and a decreased platelet count.

**Secondary outcome measurement**

Secondary outcome measurements include the AEs, regardless of grade, throughout the study period as measured by the NCI CTCAE v4.03 as well as changes in tumour size as assessed by computed tomography (CT) imaging. The study schedule is detailed in Table 1.

**Table 1 - Study schedule of SH003 Phase I study (4 weeks)**

| TIMEPOINT                    | STUDY PERIOD |                                                                                    |       |        |           |
|------------------------------|--------------|------------------------------------------------------------------------------------|-------|--------|-----------|
|                              | Enrolment    | Treatment Period                                                                   |       |        | Close-out |
|                              | Day -7       | Day 0                                                                              | Day 8 | Day 22 | Day 29    |
| Eligibility screen           | X            |                                                                                    |       |        |           |
| Informed consent             | X            |                                                                                    |       |        |           |
| Allocation                   |              | X                                                                                  |       |        |           |
| SH003                        |              |  |       |        |           |
| Demographic characteristic   | X            |                                                                                    |       |        |           |
| Physical examination         | X            | X                                                                                  | X     | X      | X         |
| Vital signs                  | X            | X                                                                                  | X     | X      | X         |
| Laboratory test              | X            |                                                                                    | X     | X      | X         |
| Electrocardiography          | X            |                                                                                    |       | X      |           |
| Pregnancy test               | X            |                                                                                    |       |        |           |
| Medical/drug use history     | X            |                                                                                    |       |        |           |
| Smoking and drinking history | X            |                                                                                    |       |        |           |
| Computed tomography          | X            |                                                                                    |       |        | X         |
| Compliance calculation       |              |                                                                                    | X     | X      |           |
| Concomitant medication       | X            | X                                                                                  | X     | X      | X         |
| Adverse event                |              |                                                                                    | X     | X      | X         |

### **Safety outcomes**

All variables related to the safety of participants, including vital signs, physical examination, hematologic, biochemical, and urine tests, and AEs will be documented on the case report form (CRF) at every visit. If an AE is severe and associated with the investigational product, the participant will be withdrawn from the study and appropriate therapy will be provided to them. Any loss caused by the present study will be reimbursed by insurance.

### **Outcomes analysis**

#### *Determination of maximum tolerated dose*

MTD will be defined as the dose just below the lowest dose level at which more than 1 out of 6 patients exhibit DLT during the 4 weeks of the trial period. In the present study, the highest dose among the three dose groups (1200 mg, 2400 mg or 4800 mg per day) with one patient or less experiencing DLT will be determined as the MTD of SH003.

All analyses of data from the present study will be descriptive, as the study includes no inferential analysis and general hypothesis testing. The continuous variables will be displayed as the median and range, and the categorical variables will be displayed as the absolute and relative frequencies. After completion of each cohort's study period, an analysis will be conducted to determine the subsequent dose level.

### **Data and safety monitoring**

To maintain the quality of the present study, monitoring will be conducted by the Contract Research Organization (CRO). The institution participating in the present study will be monitored while this trial is in progress through use of SOPs. For data quality improvement, double data entry and range checks for data values will be performed. Suspected and

1  
2  
3  
4 unexpected serious adverse reactions will be reported to the institutional review board (IRB)  
5  
6 and regulatory authorities in the Republic of Korea within 24 hours.  
7  
8  
9

### 10 **Ethics and dissemination**

11  
12 The present study has been approved by the IRB of the Ajou University Hospital (reference  
13  
14 AJIRB-MED-CT1-16-311). The current protocol version is 1.1. Written informed consent  
15  
16 will be obtained from each participant prior to commencement of the trial procedure by the  
17  
18 investigator. Informed consent for the research use of human biological material will also be  
19  
20 obtained for collection, storage, and use of blood samples from participants. The trial will be  
21  
22 performed in compliance with the Helsinki Declaration and according to Good Clinical  
23  
24 Practice as described by the Korean Ministry of Food and Drug Safety (MFDS).  
25  
26

27 Confidentiality of patients' personal information will be protected. Each participant will be  
28  
29 given a study identification number upon enrolment. During the trial period, data will be dealt  
30  
31 with by using study identification numbers. During and after the study, all records will be  
32  
33 kept in secure locked cabinets or in password-protected computer files. Only participating  
34  
35 investigators will have the authority to access the data. The results of this study will be  
36  
37 disseminated through an academic journal publication or a scientific conference.  
38  
39  
40  
41  
42

### 43 **Patient and public involvement**

44  
45 Patients or public were not involved to design the present study, and will not involve in the  
46  
47 recruitment to and conduct of the study. So far, there is no established plan for announcement  
48  
49 the results of the study to study participants.  
50  
51  
52  
53  
54  
55  
56

## DISCUSSION

The present study will investigate the tolerability and safety of administering SH003 to treat patients with solid cancers. Globally, there were 8.2 million reported deaths from cancer in 2012, and cancer is also the leading cause of mortality in Korea.<sup>17 18</sup> Thus, development of anti-cancer drugs is active in Korea. Among a total of 628 cases of investigational new drug (IND) approvals in 2016, the number of anti-cancer drugs was the highest, at 202 cases.<sup>19</sup> Nevertheless, there have been few IND approvals for new herbal medicines as anti-cancer drugs. In this situation, SH003 received IND approval from the Korean MFDS to begin a Phase I trial testing it as anti-cancer drug.

In addition to the effect of tumour size-reduction, SH003 has shown much potential as an anti-cancer agent in preclinical studies. The combination of SH003 and paclitaxel has been shown to enhance apoptotic cell death in paclitaxel-resistant breast cancer cells by inhibition of multidrug resistance protein 1 (MDR1) expression.<sup>20</sup> Decursin in Dang-Gui, one of the constituent herbs of SH003, has been shown to inhibit doxorubicin-resistant ovarian cancer cell proliferation and induce apoptosis.<sup>6</sup> The combination of SH003 and doxorubicin has shown synergistic effects in TNBC treatment.<sup>13</sup> Those studies suggest that SH003 could be used as an anti-MDR tumour agent and in combination with conventional chemotherapy drugs. SH003 has shown efficacy in treating various cancers, including breast, ovarian, and prostate cancers. Thus, further clinical studies are necessary to evaluate its effectiveness in treating various cancers. The pharmacological action of SH003 has not yet been fully elucidated. Thus, preclinical studies for SH003 will also continue to be conducted and the results will be published.

The present study is particularly significant. First, it is the only Phase I dose-escalation study conducted to date to determine the MTD for a new herbal medicine in Korea. While there have been several studies that investigated the anti-cancer effect of herbal medicine, most of

1  
2  
3  
4 these were preclinical studies or clinical trials to evaluate the effectiveness of established  
5  
6 herbal medicine in treating cancer patients.<sup>21-24</sup> Second, the present study will investigate the  
7  
8 effect of SH003 on changes in tumour size for planning further studies to evaluate its efficacy.  
9  
10 Changes in tumour size, that is objective response, are not a common outcome measurement  
11  
12 for phase I study, but have been included in the present study, expecting that the results  
13  
14 would provide helpful information to plan further studies.  
15

16  
17 Limitations of the present study are that the number of dose levels is relatively small and the  
18  
19 study does not include pharmacokinetics (PK) and pharmacodynamics (PD) research. Due to  
20  
21 the nature of the formulation, a dose exceeding 4 tablets would be inconvenient and may  
22  
23 reduce patient compliance, thus the upper limit of dose level was determined as 4800 mg per  
24  
25 day, the third dose level in this study. The effective dose estimated from preclinical studies  
26  
27 was also considered.<sup>10</sup> Most herbal medicines, including SH003, are composed of complex  
28  
29 compounds, and thus, PK and PD studies are not easy.<sup>25</sup> Therefore, it is difficult to collect PK  
30  
31 evidence on dose and frequency of administration of herbal medicines. Based on *in vivo* PK  
32  
33 studies on SH003 currently being performed, further human studies will need to be conducted.  
34  
35 One of the constituents of SH003, *Angelica gigas*, contains decursin and decursinol angelate,  
36  
37 which are characterising compounds of *Angelica gigas* according to the Korean  
38  
39 Pharmacopoeia.<sup>26</sup> Decursin and decursinol angelate have been reported to have anti-tumor  
40  
41 activities.<sup>27</sup> *Astragalus membranaceus*, another constituent herb of SH003, contains calycosin  
42  
43 and formononetin.<sup>28,29</sup> Anti-tumor effect of calycosin and formononetin has also been  
44  
45 reported.<sup>30,31</sup> Therefore, it is reasonable to conduct a pharmacokinetic studies on SH003 using  
46  
47 decursin, calycosin, and formononetin as marker compounds. Although it has not yet  
48  
49 published, plasma concentrations monitoring of decursin, decursinol angelate, decursinol,  
50  
51 calycosin, and formononetin after the administration of SH003 in rat have conducted. In the  
52  
53 study, decursin and decursinol angelate showed very low bioavailability, presumably because  
54  
55  
56  
57  
58  
59  
60

1  
2  
3  
4 of the rapid conversion of decursin and decursinol angelate to decursinol in body,<sup>32 33</sup> and  
5  
6 decursinol showed a higher plasma concentration than the other components. Therefore, it  
7  
8 suggest that decursinol could be used as a major marker compound in pharmacokinetic study  
9  
10 of SH003. Based on these results, a clinical pharmacokinetic study of SH003 is being planned.  
11  
12 Although the present study has a few limitations, it serves as the first in-human trial to  
13  
14 explore the use of SH003 to treat patients with cancer. Moreover, to the best of our  
15  
16 knowledge, this is the first phase I study of an herbal medicine in Korea. We, therefore,  
17  
18 expect that the present study could promote the overall development of new herbal medicines  
19  
20 to treat cancer and other devastating diseases.  
21  
22  
23  
24  
25  
26  
27  
28

### 29 **Authors' affiliations**

30 <sup>1</sup> Department of Korean Preventive Medicine, College of Korean Medicine, Kyung Hee  
31  
32 University, 26, Kyungheedaero-ro, Dongdaemun-gu, Seoul, Republic of Korea  
33

34 <sup>2</sup> Department of Cardiovascular and Neurologic disease (Stroke center), College of Korean  
35  
36 Medicine, Kyung Hee University, Seoul, Republic of Korea  
37  
38  
39  
40  
41

### 42 **Acknowledgements**

43 We wish to acknowledge Hanpoong Phar. & Foods Co. Ltd. for providing investigational  
44  
45 product support.  
46  
47  
48  
49  
50  
51  
52  
53  
54  
55  
56



## Contributors

CC, SK and YK have written the first manuscript for this trial and they will contribute to monitoring this trial. MK, BHJ and YCS have edited the first manuscript. SGK has conducted all the procedures for this protocol. All authors have read and approved the final manuscript.

## Funding

This research was supported by a grant of the Korea Health Technology R&D Project through the Korea Health Industry Development Institute (KHIDI), funded by the Ministry of Health & Welfare, Republic of Korea (grant number : HI11C2110). The management, analysis and reporting of study will be conducted independently by the study investigators.

## Competing interests

None declared.

## Patients consent

Obtained

## Ethics approval

The Institutional Review Board of the Ajou University Hospital approved the study (reference AJIRB-MED-CT1-16-311).

## Provenance and peer review

Not commissioned; externally peer reviewed.

## References

1. World Health Organization. Cancer, fact sheet. Updated February 2017. World Health Organization, 2017.
2. World Health Organization. World cancer report 2014. Lyon: International Agency for Research on Cancer, 2014.
3. National Cancer Center. National Cancer Information Center 2017. <http://www.cancer.go.kr> (accessed July 2017)
4. Hyun KR, Lee SM. Analysis of Socioeconomic Costs of Five Major Diseases. *Health insurance & policy* 2014;13(2):91-107.
5. Auyeung KK, Han QB, Ko JK. Astragalus membranaceus: A Review of its Protection Against Inflammation and Gastrointestinal Cancers. *Am J Chin Med* 2016;44(1):1-22.
6. Choi HS, Cho SG, Kim MK, et al. Decursin in Angelica gigas Nakai (AGN) Enhances Doxorubicin Chemosensitivity in NCI/ADR-RES Ovarian Cancer Cells via Inhibition of P-glycoprotein Expression. *Phytother Res* 2016;30(12):2020-26.
7. Li J, Li H, Zhang Z, et al. The anti-cancerous activity of recombinant trichosanthin on prostate cancer cell PC3. *Biol Res* 2016;49:21.
8. National College of Korean Medicine Publication Committee on Joint Textbook. Herbology. Seoul, Korea: Younglimsa 2016.
9. Choi YK, Cho SG, Choi YJ, et al. SH003 suppresses breast cancer growth by accumulating p62 in autolysosomes. *Oncotarget* 2016;8(51):88386-88400.
10. Choi YK, Cho SG, Woo SM, et al. Herbal extract SH003 suppresses tumor growth and metastasis of MDA-MB-231 breast cancer cells by inhibiting STAT3-IL-6 signaling. *Mediators Inflamm* 2014;2014:492173.
11. Choi HS, Kim MK, Lee K, et al. SH003 represses tumor angiogenesis by blocking VEGF binding to VEGFR2. *Oncotarget* 2016;7(22):32969-79.
12. Choi YJ, Choi YK, Lee KM, et al. SH003 induces apoptosis of DU145 prostate cancer cells by inhibiting ERK-involved pathway. *BMC Complement Altern Med* 2016;16(1):507.
13. Woo SM, Kim AJ, Choi YK, et al. Synergistic Effect of SH003 and Doxorubicin in Triple-negative Breast Cancer. *Phytother Res* 2016;30(11):1817-23.
14. Storer BE. An evaluation of phase I clinical trial designs in the continuous dose-response setting. *Stat Med* 2001;20(16):2399-408.
15. U.S. Dept. of Health and Human Services, Food and Drug Administration, Center for Drug Evaluation and Research. Guidance for industry estimating the maximum safe starting dose in initial clinical trials for therapeutics in adult healthy volunteers. Rockville, MD. USA: Food and Drug Administration, 2005.
16. U.S. Department of Health and Human Services. Common Terminology Criteria for Adverse Events (CTCAE) v4.03: National Institutes of Health National Cancer Institute, 2010.
17. International Agency for Research on Cancer. GLOBOCAN 2012: Estimated Cancer Incidence, Mortality and Prevalence Worldwide in 2012. World Health Organization, 2012. [http://globocan.iarc.fr/Pages/fact\\_sheets\\_cancer.aspx](http://globocan.iarc.fr/Pages/fact_sheets_cancer.aspx)
18. National Cancer Center. Cancer Facts & Figures 2014. Ministry of Health & Welfare, 2014.
19. Ministry of Food and Drug Safety. MFDS, Results of the Investigational New Drug approval status 2016. Ministry of Food and Drug Safety, 2017.

20. Choi HS, Cho SG, Kim MK, et al. SH003 enhances paclitaxel chemosensitivity in MCF-7/PAX breast cancer cells through inhibition of MDR1 activity. *Mol Cell Biochem* 2017;426(1-2):1-8.
21. Kim HY, Kim J, Ha Thi HT, et al. Evaluation of anti-tumorigenic activity of BP3B against colon cancer with patient-derived tumor xenograft model. *BMC Complement Altern Med* 2016;16(1):473.
22. Choi BY, Joo JC, Lee YK, et al. Anti-cancer effect of *Scutellaria baicalensis* in combination with cisplatin in human ovarian cancer cell. *BMC Complement Altern Med* 2017;17(1):277.
23. Lee SI, Bae JA, Ko YS, et al. Gejijagajakyak decoction inhibits the motility and tumorigenesis of colorectal cancer cells. *BMC Complement Altern Med* 2016;16(1):288.
24. Jeong JS, Ryu BH, Kim JS, et al. Bojungikki-tang for cancer-related fatigue: a pilot randomized clinical trial. *Integr Cancer Ther* 2010;9(4):331-8.
25. Liu WJH. Traditional Herbal Medicine Research Methods: Identification, Analysis, Bioassay, and Pharmaceutical and Clinical Studies: Wiley 2011.
26. Ministry of Food and Drug Safety, The Korean Pharmacopoeia Eleventh Edition, Ministry of Food and Drug Safety, Seoul, Korea, 2017.
27. Lee S, Lee YS, Jung SH, et al. Anti-tumor activities of decursinol angelate and decursin from *Angelica gigas*. *Arch Pharm Res.* 2003;26(9):727-30.
28. Ma X, Tu P, Chen Y, et al. Preparative isolation and purification of two isoflavones from *Astragalus membranaceus* Bge. var. *mongholicus* (Bge.) Hsiao by high-speed counter-current chromatography. *J Chromatogr A.* 2003;992(1-2):193-7.
29. Wu J, Ke X, Ma N, et al. Formononetin, an active compound of *Astragalus membranaceus* (Fisch) Bunge, inhibits hypoxia-induced retinal neovascularization via the HIF-1 $\alpha$ /VEGF signaling pathway. *Drug Des Devel Ther.* 2016;10:3071-3081.
30. Chen J, Hou R, Zhang X, et al. Calycosin suppresses breast cancer cell growth via ER $\beta$ -dependent regulation of IGF-1R, p38 MAPK and PI3K/Akt pathways. *PLoS One.* 2014;9(3):e91245.
31. Wu XY, Xu H, Wu ZF, et al. Formononetin, a novel FGFR2 inhibitor, potently inhibits angiogenesis and tumor growth in preclinical models. *Oncotarget.* 2015;6(42):44563-78.
32. Kim KM, Kim MJ, Kang JS. Absorption, distribution, metabolism, and excretion of decursin and decursinol angelate from *Angelica gigas* Nakai. *J Microbiol Biotechnol.* 2009;19(12):1569-72.
33. Zhang J, Li L, Hale TW, et al. Single oral dose pharmacokinetics of decursin and decursinol angelate in healthy adult men and women. *PLoS One.* 2015;10(2):e0114992.

## List of Figure

Figure 1. Study flow chart

1  
2  
3  
4  
5  
6  
7  
8  
9  
10  
11  
12  
13  
14  
15  
16  
17  
18  
19  
20  
21  
22  
23  
24  
25  
26  
27  
28  
29  
30  
31  
32  
33  
34  
35  
36  
37  
38  
39  
40  
41  
42  
43  
44  
45  
46  
47  
48  
49  
50  
51  
52  
53  
54  
55  
56  
57  
58  
59  
60



Study flow chart. SH003



SPIRIT 2013 Checklist: Recommended items to address in a clinical trial protocol and related documents\*

| Section/item                      | Item No | Description                                                                                                                                                                                                                                                                              | Addressed on page number |
|-----------------------------------|---------|------------------------------------------------------------------------------------------------------------------------------------------------------------------------------------------------------------------------------------------------------------------------------------------|--------------------------|
| <b>Administrative information</b> |         |                                                                                                                                                                                                                                                                                          |                          |
| Title                             | 1       | Descriptive title identifying the study design, population, interventions, and, if applicable, trial acronym                                                                                                                                                                             | _____1_____              |
| Trial registration                | 2a      | Trial identifier and registry name. If not yet registered, name of intended registry                                                                                                                                                                                                     | _____2_____              |
|                                   | 2b      | All items from the World Health Organization Trial Registration Data Set                                                                                                                                                                                                                 | ___Appendix___           |
| Protocol version                  | 3       | Date and version identifier                                                                                                                                                                                                                                                              | _____11_____             |
| Funding                           | 4       | Sources and types of financial, material, and other support                                                                                                                                                                                                                              | _____13_____             |
| Roles and responsibilities        | 5a      | Names, affiliations, and roles of protocol contributors                                                                                                                                                                                                                                  | _____13_____             |
|                                   | 5b      | Name and contact information for the trial sponsor                                                                                                                                                                                                                                       | _____13_____             |
|                                   | 5c      | Role of study sponsor and funders, if any, in study design; collection, management, analysis, and interpretation of data; writing of the report; and the decision to submit the report for publication, including whether they will have ultimate authority over any of these activities | _____13_____             |
|                                   | 5d      | Composition, roles, and responsibilities of the coordinating centre, steering committee, endpoint adjudication committee, data management team, and other individuals or groups overseeing the trial, if applicable (see Item 21a for data monitoring committee)                         | _____NA_____             |

1  
2  
3  
4  
5  
6  
7  
8  
9  
10  
11  
12  
13  
14  
15  
16  
17  
18  
19  
20  
21  
22  
23  
24  
25  
26  
27  
28  
29  
30  
31  
32  
33  
34  
35  
36  
37  
38  
39  
40  
41  
42  
43  
44  
45  
46  
47

**Introduction**

|                          |    |                                                                                                                                                                                                           |     |
|--------------------------|----|-----------------------------------------------------------------------------------------------------------------------------------------------------------------------------------------------------------|-----|
| Background and rationale | 6a | Description of research question and justification for undertaking the trial, including summary of relevant studies (published and unpublished) examining benefits and harms for each intervention        | 3-4 |
|                          | 6b | Explanation for choice of comparators                                                                                                                                                                     | NA  |
| Objectives               | 7  | Specific objectives or hypotheses                                                                                                                                                                         | 4   |
| Trial design             | 8  | Description of trial design including type of trial (eg, parallel group, crossover, factorial, single group), allocation ratio, and framework (eg, superiority, equivalence, noninferiority, exploratory) | 4   |

**Methods: Participants, interventions, and outcomes**

|                      |     |                                                                                                                                                                                                                                                                                                                                                                                |     |
|----------------------|-----|--------------------------------------------------------------------------------------------------------------------------------------------------------------------------------------------------------------------------------------------------------------------------------------------------------------------------------------------------------------------------------|-----|
| Study setting        | 9   | Description of study settings (eg, community clinic, academic hospital) and list of countries where data will be collected. Reference to where list of study sites can be obtained                                                                                                                                                                                             | 4   |
| Eligibility criteria | 10  | Inclusion and exclusion criteria for participants. If applicable, eligibility criteria for study centres and individuals who will perform the interventions (eg, surgeons, psychotherapists)                                                                                                                                                                                   | 5-6 |
| Interventions        | 11a | Interventions for each group with sufficient detail to allow replication, including how and when they will be administered                                                                                                                                                                                                                                                     | 7   |
|                      | 11b | Criteria for discontinuing or modifying allocated interventions for a given trial participant (eg, drug dose change in response to harms, participant request, or improving/worsening disease)                                                                                                                                                                                 | 6   |
|                      | 11c | Strategies to improve adherence to intervention protocols, and any procedures for monitoring adherence (eg, drug tablet return, laboratory tests)                                                                                                                                                                                                                              | 7   |
|                      | 11d | Relevant concomitant care and interventions that are permitted or prohibited during the trial                                                                                                                                                                                                                                                                                  | 7   |
| Outcomes             | 12  | Primary, secondary, and other outcomes, including the specific measurement variable (eg, systolic blood pressure), analysis metric (eg, change from baseline, final value, time to event), method of aggregation (eg, median, proportion), and time point for each outcome. Explanation of the clinical relevance of chosen efficacy and harm outcomes is strongly recommended | 8   |
| Participant timeline | 13  | Time schedule of enrolment, interventions (including any run-ins and washouts), assessments, and visits for participants. A schematic diagram is highly recommended (see Figure)                                                                                                                                                                                               | 9   |

|   |             |    |                                                                                                                                                                                       |             |
|---|-------------|----|---------------------------------------------------------------------------------------------------------------------------------------------------------------------------------------|-------------|
| 1 |             |    |                                                                                                                                                                                       |             |
| 2 |             |    |                                                                                                                                                                                       |             |
| 3 | Sample size | 14 | Estimated number of participants needed to achieve study objectives and how it was determined, including clinical and statistical assumptions supporting any sample size calculations | _____6_____ |
| 4 |             |    |                                                                                                                                                                                       |             |
| 5 | Recruitment | 15 | Strategies for achieving adequate participant enrolment to reach target sample size                                                                                                   | _____5_____ |
| 6 |             |    |                                                                                                                                                                                       |             |
| 7 |             |    |                                                                                                                                                                                       |             |

### 8 **Methods: Assignment of interventions (for controlled trials)**

#### 9 Allocation:

|    |                                  |     |                                                                                                                                                                                                                                                                                                                                                          |              |
|----|----------------------------------|-----|----------------------------------------------------------------------------------------------------------------------------------------------------------------------------------------------------------------------------------------------------------------------------------------------------------------------------------------------------------|--------------|
| 10 |                                  |     |                                                                                                                                                                                                                                                                                                                                                          |              |
| 11 |                                  |     |                                                                                                                                                                                                                                                                                                                                                          |              |
| 12 | Sequence generation              | 16a | Method of generating the allocation sequence (eg, computer-generated random numbers), and list of any factors for stratification. To reduce predictability of a random sequence, details of any planned restriction (eg, blocking) should be provided in a separate document that is unavailable to those who enrol participants or assign interventions | _____NA_____ |
| 13 |                                  |     |                                                                                                                                                                                                                                                                                                                                                          |              |
| 14 |                                  |     |                                                                                                                                                                                                                                                                                                                                                          |              |
| 15 |                                  |     |                                                                                                                                                                                                                                                                                                                                                          |              |
| 16 |                                  |     |                                                                                                                                                                                                                                                                                                                                                          |              |
| 17 | Allocation concealment mechanism | 16b | Mechanism of implementing the allocation sequence (eg, central telephone; sequentially numbered, opaque, sealed envelopes), describing any steps to conceal the sequence until interventions are assigned                                                                                                                                                | _____NA_____ |
| 18 |                                  |     |                                                                                                                                                                                                                                                                                                                                                          |              |
| 19 |                                  |     |                                                                                                                                                                                                                                                                                                                                                          |              |
| 20 |                                  |     |                                                                                                                                                                                                                                                                                                                                                          |              |
| 21 | Implementation                   | 16c | Who will generate the allocation sequence, who will enrol participants, and who will assign participants to interventions                                                                                                                                                                                                                                | _____NA_____ |
| 22 |                                  |     |                                                                                                                                                                                                                                                                                                                                                          |              |
| 23 |                                  |     |                                                                                                                                                                                                                                                                                                                                                          |              |
| 24 | Blinding (masking)               | 17a | Who will be blinded after assignment to interventions (eg, trial participants, care providers, outcome assessors, data analysts), and how                                                                                                                                                                                                                | _____NA_____ |
| 25 |                                  |     |                                                                                                                                                                                                                                                                                                                                                          |              |
| 26 |                                  |     |                                                                                                                                                                                                                                                                                                                                                          |              |
| 27 |                                  | 17b | If blinded, circumstances under which unblinding is permissible, and procedure for revealing a participant's allocated intervention during the trial                                                                                                                                                                                                     | _____NA_____ |
| 28 |                                  |     |                                                                                                                                                                                                                                                                                                                                                          |              |
| 29 |                                  |     |                                                                                                                                                                                                                                                                                                                                                          |              |
| 30 |                                  |     |                                                                                                                                                                                                                                                                                                                                                          |              |

### 31 **Methods: Data collection, management, and analysis**

|    |                         |     |                                                                                                                                                                                                                                                                                                                                                                                                              |             |
|----|-------------------------|-----|--------------------------------------------------------------------------------------------------------------------------------------------------------------------------------------------------------------------------------------------------------------------------------------------------------------------------------------------------------------------------------------------------------------|-------------|
| 32 |                         |     |                                                                                                                                                                                                                                                                                                                                                                                                              |             |
| 33 | Data collection methods | 18a | Plans for assessment and collection of outcome, baseline, and other trial data, including any related processes to promote data quality (eg, duplicate measurements, training of assessors) and a description of study instruments (eg, questionnaires, laboratory tests) along with their reliability and validity, if known. Reference to where data collection forms can be found, if not in the protocol | _____8_____ |
| 34 |                         |     |                                                                                                                                                                                                                                                                                                                                                                                                              |             |
| 35 |                         |     |                                                                                                                                                                                                                                                                                                                                                                                                              |             |
| 36 |                         |     |                                                                                                                                                                                                                                                                                                                                                                                                              |             |
| 37 |                         |     |                                                                                                                                                                                                                                                                                                                                                                                                              |             |
| 38 |                         | 18b | Plans to promote participant retention and complete follow-up, including list of any outcome data to be collected for participants who discontinue or deviate from intervention protocols                                                                                                                                                                                                                    | _____6_____ |
| 39 |                         |     |                                                                                                                                                                                                                                                                                                                                                                                                              |             |
| 40 |                         |     |                                                                                                                                                                                                                                                                                                                                                                                                              |             |
| 41 |                         |     |                                                                                                                                                                                                                                                                                                                                                                                                              |             |
| 42 |                         |     |                                                                                                                                                                                                                                                                                                                                                                                                              |             |
| 43 |                         |     |                                                                                                                                                                                                                                                                                                                                                                                                              |             |
| 44 |                         |     |                                                                                                                                                                                                                                                                                                                                                                                                              |             |
| 45 |                         |     |                                                                                                                                                                                                                                                                                                                                                                                                              |             |
| 46 |                         |     |                                                                                                                                                                                                                                                                                                                                                                                                              |             |
| 47 |                         |     |                                                                                                                                                                                                                                                                                                                                                                                                              |             |

1  
2  
3  
4  
5  
6  
7  
8  
9  
10  
11  
12  
13  
14  
15  
16  
17  
18  
19  
20  
21  
22  
23  
24  
25  
26  
27  
28  
29  
30  
31  
32  
33  
34  
35  
36  
37  
38  
39  
40  
41  
42  
43  
44  
45  
46  
47

|                 |    |                                                                                                                                                                                                                                                                   |              |
|-----------------|----|-------------------------------------------------------------------------------------------------------------------------------------------------------------------------------------------------------------------------------------------------------------------|--------------|
| Data management | 19 | Plans for data entry, coding, security, and storage, including any related processes to promote data quality (eg, double data entry; range checks for data values). Reference to where details of data management procedures can be found, if not in the protocol | _____10_____ |
|-----------------|----|-------------------------------------------------------------------------------------------------------------------------------------------------------------------------------------------------------------------------------------------------------------------|--------------|

|                     |     |                                                                                                                                                                          |              |
|---------------------|-----|--------------------------------------------------------------------------------------------------------------------------------------------------------------------------|--------------|
| Statistical methods | 20a | Statistical methods for analysing primary and secondary outcomes. Reference to where other details of the statistical analysis plan can be found, if not in the protocol | _____10_____ |
|---------------------|-----|--------------------------------------------------------------------------------------------------------------------------------------------------------------------------|--------------|

|  |     |                                                                          |              |
|--|-----|--------------------------------------------------------------------------|--------------|
|  | 20b | Methods for any additional analyses (eg, subgroup and adjusted analyses) | _____10_____ |
|--|-----|--------------------------------------------------------------------------|--------------|

|  |     |                                                                                                                                                                                 |             |
|--|-----|---------------------------------------------------------------------------------------------------------------------------------------------------------------------------------|-------------|
|  | 20c | Definition of analysis population relating to protocol non-adherence (eg, as randomised analysis), and any statistical methods to handle missing data (eg, multiple imputation) | _____6_____ |
|--|-----|---------------------------------------------------------------------------------------------------------------------------------------------------------------------------------|-------------|

**Methods: Monitoring**

|                 |     |                                                                                                                                                                                                                                                                                                                                       |              |
|-----------------|-----|---------------------------------------------------------------------------------------------------------------------------------------------------------------------------------------------------------------------------------------------------------------------------------------------------------------------------------------|--------------|
| Data monitoring | 21a | Composition of data monitoring committee (DMC); summary of its role and reporting structure; statement of whether it is independent from the sponsor and competing interests; and reference to where further details about its charter can be found, if not in the protocol. Alternatively, an explanation of why a DMC is not needed | _____10_____ |
|-----------------|-----|---------------------------------------------------------------------------------------------------------------------------------------------------------------------------------------------------------------------------------------------------------------------------------------------------------------------------------------|--------------|

|  |     |                                                                                                                                                                         |              |
|--|-----|-------------------------------------------------------------------------------------------------------------------------------------------------------------------------|--------------|
|  | 21b | Description of any interim analyses and stopping guidelines, including who will have access to these interim results and make the final decision to terminate the trial | _____10_____ |
|--|-----|-------------------------------------------------------------------------------------------------------------------------------------------------------------------------|--------------|

|       |    |                                                                                                                                                                                   |              |
|-------|----|-----------------------------------------------------------------------------------------------------------------------------------------------------------------------------------|--------------|
| Harms | 22 | Plans for collecting, assessing, reporting, and managing solicited and spontaneously reported adverse events and other unintended effects of trial interventions or trial conduct | _____10_____ |
|-------|----|-----------------------------------------------------------------------------------------------------------------------------------------------------------------------------------|--------------|

|          |    |                                                                                                                                             |              |
|----------|----|---------------------------------------------------------------------------------------------------------------------------------------------|--------------|
| Auditing | 23 | Frequency and procedures for auditing trial conduct, if any, and whether the process will be independent from investigators and the sponsor | _____NA_____ |
|----------|----|---------------------------------------------------------------------------------------------------------------------------------------------|--------------|

**Ethics and dissemination**

|                          |    |                                                                                           |              |
|--------------------------|----|-------------------------------------------------------------------------------------------|--------------|
| Research ethics approval | 24 | Plans for seeking research ethics committee/institutional review board (REC/IRB) approval | _____11_____ |
|--------------------------|----|-------------------------------------------------------------------------------------------|--------------|

|                     |    |                                                                                                                                                                                                                                  |             |
|---------------------|----|----------------------------------------------------------------------------------------------------------------------------------------------------------------------------------------------------------------------------------|-------------|
| Protocol amendments | 25 | Plans for communicating important protocol modifications (eg, changes to eligibility criteria, outcomes, analyses) to relevant parties (eg, investigators, REC/IRBs, trial participants, trial registries, journals, regulators) | _____4_____ |
|---------------------|----|----------------------------------------------------------------------------------------------------------------------------------------------------------------------------------------------------------------------------------|-------------|

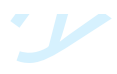



|    |                               |     |                                                                                                                                                                                                                                                                                     |                |
|----|-------------------------------|-----|-------------------------------------------------------------------------------------------------------------------------------------------------------------------------------------------------------------------------------------------------------------------------------------|----------------|
| 1  |                               |     |                                                                                                                                                                                                                                                                                     |                |
| 2  |                               |     |                                                                                                                                                                                                                                                                                     |                |
| 3  | Consent or assent             | 26a | Who will obtain informed consent or assent from potential trial participants or authorised surrogates, and how (see Item 32)                                                                                                                                                        | _____11_____   |
| 4  |                               |     |                                                                                                                                                                                                                                                                                     |                |
| 5  |                               |     |                                                                                                                                                                                                                                                                                     |                |
| 6  |                               | 26b | Additional consent provisions for collection and use of participant data and biological specimens in ancillary studies, if applicable                                                                                                                                               | _____11_____   |
| 7  |                               |     |                                                                                                                                                                                                                                                                                     |                |
| 8  | Confidentiality               | 27  | How personal information about potential and enrolled participants will be collected, shared, and maintained in order to protect confidentiality before, during, and after the trial                                                                                                | _____11_____   |
| 9  |                               |     |                                                                                                                                                                                                                                                                                     |                |
| 10 |                               |     |                                                                                                                                                                                                                                                                                     |                |
| 11 | Declaration of interests      | 28  | Financial and other competing interests for principal investigators for the overall trial and each study site                                                                                                                                                                       | _____14_____   |
| 12 |                               |     |                                                                                                                                                                                                                                                                                     |                |
| 13 |                               |     |                                                                                                                                                                                                                                                                                     |                |
| 14 | Access to data                | 29  | Statement of who will have access to the final trial dataset, and disclosure of contractual agreements that limit such access for investigators                                                                                                                                     | _____11_____   |
| 15 |                               |     |                                                                                                                                                                                                                                                                                     |                |
| 16 |                               |     |                                                                                                                                                                                                                                                                                     |                |
| 17 | Ancillary and post-trial care | 30  | Provisions, if any, for ancillary and post-trial care, and for compensation to those who suffer harm from trial participation                                                                                                                                                       | _____10_____   |
| 18 |                               |     |                                                                                                                                                                                                                                                                                     |                |
| 19 |                               |     |                                                                                                                                                                                                                                                                                     |                |
| 20 | Dissemination policy          | 31a | Plans for investigators and sponsor to communicate trial results to participants, healthcare professionals, the public, and other relevant groups (eg, via publication, reporting in results databases, or other data sharing arrangements), including any publication restrictions | _____11_____   |
| 21 |                               |     |                                                                                                                                                                                                                                                                                     |                |
| 22 |                               |     |                                                                                                                                                                                                                                                                                     |                |
| 23 |                               |     |                                                                                                                                                                                                                                                                                     |                |
| 24 |                               |     |                                                                                                                                                                                                                                                                                     |                |
| 25 |                               | 31b | Authorship eligibility guidelines and any intended use of professional writers                                                                                                                                                                                                      | _____13_____   |
| 26 |                               |     |                                                                                                                                                                                                                                                                                     |                |
| 27 |                               | 31c | Plans, if any, for granting public access to the full protocol, participant-level dataset, and statistical code                                                                                                                                                                     | _____NA_____   |
| 28 |                               |     |                                                                                                                                                                                                                                                                                     |                |
| 29 | <b>Appendices</b>             |     |                                                                                                                                                                                                                                                                                     |                |
| 30 |                               |     |                                                                                                                                                                                                                                                                                     |                |
| 31 | Informed consent materials    | 32  | Model consent form and other related documentation given to participants and authorised surrogates                                                                                                                                                                                  | ___Appendix___ |
| 32 |                               |     |                                                                                                                                                                                                                                                                                     |                |
| 33 |                               |     |                                                                                                                                                                                                                                                                                     |                |
| 34 | Biological specimens          | 33  | Plans for collection, laboratory evaluation, and storage of biological specimens for genetic or molecular analysis in the current trial and for future use in ancillary studies, if applicable                                                                                      | _____NA_____   |
| 35 |                               |     |                                                                                                                                                                                                                                                                                     |                |
| 36 |                               |     |                                                                                                                                                                                                                                                                                     |                |

37 \*It is strongly recommended that this checklist be read in conjunction with the SPIRIT 2013 Explanation & Elaboration for important clarification on the items.  
 38 Amendments to the protocol should be tracked and dated. The SPIRIT checklist is copyrighted by the SPIRIT Group under the Creative Commons  
 39 "[Attribution-NonCommercial-NoDerivs 3.0 Unported](https://creativecommons.org/licenses/by-nc-nd/3.0/)" license.  
 40
